# Supplementary material for: Global effects of DNA replication and DNA replication origin activity on eukaryotic gene expression
Source: PubMed Central journal article supplement — Mol Syst Biol. 2009 Oct 13;5:312. doi: 10.1038/msb.2009.70 (PMC2779084; doi:10.1038/msb.2009.70), 2009-10-13

```
(* © Orly Alter 2009 *)
```

```
(* All Rights Reserved *)
```

```
<< LinearAlgebra`MatrixManipulation`;  
<< Graphics`Graphics`;  
<< Graphics`Arrow`;  
Off[General::"spell"];  
Off[General::"spell1"];
```

```
(* Tensor HOSVD Modeling of DNA Microarray Data *)
```

```
(* Combine Data from Two Different DNA Microarray Platforms *)
```

```
(* Read Relative mRNA Expression Data from the First DNA Microarray Platform *)
```

```
stream = "Desktop/96/Data/24_SC18_R.txt";  
matrix = Import[stream, "Table"];  
{spots, arrays} = Dimensions[matrix] - {3, 1}  
Clear[stream];
```

```
{4771, 24}
```

```
genenames = TakeRows [  
  TakeColumns[matrix, {1, 1}],  
  {4, spots + 3}];  
arraynames = TakeColumns [  
  TakeRows[matrix, {1, 3}],  
  {2, arrays + 1}];  
matrix = TakeColumns [  
  TakeRows[matrix, {4, spots + 3}],  
  {2, arrays + 1}];  
matrix = ToExpression[matrix];
```

```
(* Convert Data to Log2 of Relative mRNA Expression *)
```

```
matrix = N[Log[2, matrix]];  
matrix = ReplaceAll[matrix, N[Log[Null] / Log[2]] -> "Null"];
```

```
(* Average Data from Multiple Probes of the Same Gene *)
```

```
Do[If[genenames[[a]] == genenames[[a + 1]],  
  If[genenames[[a]] == genenames[[a + 2]],  
    If[genenames[[a]] == genenames[[a + 3]],  
      Do[{count = Count[{matrix[[a, b]], matrix[[a + 1, b]], matrix[[a + 2, b]], matrix[[a + 3, b]]}, "Null"],  
        If[count == 4,  
          matrix[[a, b]] = "Null",  
          matrix[[a, b]] = ReplaceAll[ (  
            matrix[[a, b]] + matrix[[a + 1, b]] + matrix[[a + 2, b]] + matrix[[a + 3, b]]  
          ) / (4 - count), "Null" -> 0]}],  
        {b, 1, arrays}]]],  
  matrix[[a]] = matrix[[a]],  
  {a, 1, spots - 3}]
```

```

Do[If[genenames[[a]] == genenames[[a + 1]],
  If[genenames[[a]] == genenames[[a + 2]],
    If[genenames[[a]] == genenames[[a + 3]],
      {matrix = Drop[matrix, {a + 1, a + 3}],
        genenames = Drop[genenames, {a + 1, a + 3}]}],
  {a, spots - 3, 1, -1}]
{spots, arrays} = Dimensions[matrix]

{4762, 24}

```

```

Do[If[genenames[[a]] == genenames[[a + 1]],
  If[genenames[[a]] == genenames[[a + 2]],
    Do[{count = Count[{matrix[[a, b]], matrix[[a + 1, b]], matrix[[a + 2, b]]}, "Null"],
      If[count == 3,
        matrix[[a, b]] = "Null",
        matrix[[a, b]] = ReplaceAll[(
          matrix[[a, b]] + matrix[[a + 1, b]] + matrix[[a + 2, b]]
        ) / (3 - count), "Null" -> 0]],
      {b, 1, arrays}]],
  matrix[[a]] = matrix[[a]],
  {a, 1, spots - 2}]
Do[If[genenames[[a]] == genenames[[a + 1]],
  If[genenames[[a]] == genenames[[a + 2]],
    {matrix = Drop[matrix, {a + 1, a + 2}],
      genenames = Drop[genenames, {a + 1, a + 2}]}],
  {a, spots - 2, 1, -1}]
{spots, arrays} = Dimensions[matrix]

{4558, 24}

```

```

Do[If[genenames[[a]] == genenames[[a + 1]],
  Do[{count = Count[{matrix[[a, b]], matrix[[a + 1, b]]}, "Null"],
    If[count == 2,
      matrix[[a, b]] = "Null",
      matrix[[a, b]] = ReplaceAll[(
        matrix[[a, b]] + matrix[[a + 1, b]]
      ) / (2 - count), "Null" -> 0]],
    {b, 1, arrays}],
  matrix[[a]] = matrix[[a]],
  {a, 1, spots - 1}]
Do[If[genenames[[a]] == genenames[[a + 1]],
  {matrix = Drop[matrix, {a + 1}],
    genenames = Drop[genenames, {a + 1}]}],
  {a, spots - 1, 1, -1}]
sc18 = AppendColumns[arraynames, matrix];

```

(\* Read Relative mRNA Expression Data from the Second DNA Microarray Platform \*)

```

stream = "Desktop/96/Data/72_STL_R.txt";
matrix = Import[stream, "Table"];
{spots, arrays} = Dimensions[matrix] - {3, 1}
Clear[stream];

```

```
{8540, 72}
```

```

genenames = TakeRows[TakeColumns[matrix, {1, 1}],
  {4, spots + 3}];
arraynames = TakeColumns[TakeRows[matrix, {1, 3}],
  {2, arrays + 1}];
matrix = TakeColumns[TakeRows[matrix, {4, spots + 3}],
  {2, arrays + 1}];
matrix = ToExpression[matrix];

```

(\* Convert Data to Log<sub>2</sub> of Relative mRNA Expression \*)

```

matrix = N[Log[2, matrix]];
matrix = ReplaceAll[matrix, N[Log[Null] / Log[2]] -> "Null"];

```

```
(* Average Data from Multiple Probes of the Same Gene *)
```

```
Do[If[genenames[[a]] == genenames[[a + 1]],  
  Do[{count = Count[{matrix[[a, b]], matrix[[a + 1, b]]}], "Null"],  
    If[count == 2,  
      matrix[[a, b]] = "Null",  
      matrix[[a, b]] = ReplaceAll[(  
        matrix[[a, b]] + matrix[[a + 1, b]]  
      ) / (2 - count), "Null" -> 0]],  
    {b, 1, arrays}],  
  matrix[[a]] = matrix[[a]],  
  {a, 1, spots - 1}]  
Do[If[genenames[[a]] == genenames[[a + 1]],  
  {matrix = Drop[matrix, {a + 1}],  
  genenames = Drop[genenames, {a + 1}]}],  
  {a, spots - 1, 1, -1}]  
st1 = AppendColumns[arraynames, matrix];
```

```
(* Combine Data from the Two Different DNA Microarray Platforms *)
```

```
matrix = N[AppendRows[  
  AppendColumns[{"YORF"}, {"YORF"}, {"YORF"}], genenames],  
  TakeColumns[sc18, {1, 12}],  
  TakeColumns[st1, {1, 36}],  
  TakeColumns[sc18, {13, 24}],  
  TakeColumns[st1, {37, 72}]]];  
{genes, arrays} = Dimensions[matrix] - {3, 1}  
Clear[sc18, st1];  
  
{4270, 96}  
  
genenames = TakeRows[  
  TakeColumns[matrix, {1, 1}],  
  {4, genes + 3}];  
arraynames = TakeColumns[  
  TakeRows[matrix, {1, 3}],  
  {2, arrays + 1}];  
matrix = TakeColumns[  
  TakeRows[matrix, {4, genes + 3}],  
  {2, arrays + 1}];  
matrix = ToExpression[matrix];  
  
tensor = {  
  TakeColumns[matrix, {1, 6}], TakeColumns[matrix, {7, 12}],  
  TakeColumns[matrix, {13, 18}], TakeColumns[matrix, {19, 24}],  
  TakeColumns[matrix, {25, 30}], TakeColumns[matrix, {31, 36}],  
  TakeColumns[matrix, {37, 42}], TakeColumns[matrix, {43, 48}],  
  TakeColumns[matrix, {49, 54}], TakeColumns[matrix, {55, 60}],  
  TakeColumns[matrix, {61, 66}], TakeColumns[matrix, {67, 72}],  
  TakeColumns[matrix, {73, 78}], TakeColumns[matrix, {79, 84}],  
  TakeColumns[matrix, {85, 90}], TakeColumns[matrix, {91, 96}]}];  
{yarrays, zgenes, xarrays} = Dimensions[tensor]  
  
{16, 4270, 6}  
  
tensornames = {  
  TakeColumns[arraynames, {1, 6}], TakeColumns[arraynames, {7, 12}],  
  TakeColumns[arraynames, {13, 18}], TakeColumns[arraynames, {19, 24}],  
  TakeColumns[arraynames, {25, 30}], TakeColumns[arraynames, {31, 36}],  
  TakeColumns[arraynames, {37, 42}], TakeColumns[arraynames, {43, 48}],  
  TakeColumns[arraynames, {49, 54}], TakeColumns[arraynames, {55, 60}],  
  TakeColumns[arraynames, {61, 66}], TakeColumns[arraynames, {67, 72}],  
  TakeColumns[arraynames, {73, 78}], TakeColumns[arraynames, {79, 84}],  
  TakeColumns[arraynames, {85, 90}], TakeColumns[arraynames, {91, 96}]}];
```

```
(* Estimate Missing Data Using SVD *)
```

```
(* Count Missing Data *)
```

```
counter = Table[0, {yarrays}];
numbers = Table[0, {yarrays}];
gnumbers = Table[0, {yarrays}];
framex = Table[{a, a - 1}, {a, 1, 3}];
framey = {1000, 2000, 3000, 4000};

Do[{
  matrix = tensor[[t]],
  counter[[t]] = Table[Dimensions[Position[matrix[[a]], Null]][[1]], {a, 1, genes}],
  positions = Table[0, {a, 1, xarrays + 1}],
  Do[
    positions[[a]] = Flatten[Position[Flatten[counter[[t]]], a - 1]],
    {a, 1, xarrays + 1}],
  numbers[[t]] = Flatten[Table[Dimensions[positions[[a]]],
    {a, 1, 3}]],
  labelx1 = If[t > 12, "Number of x-Settings", " "],
  labelx2 = ColumnForm[{" ", tensornames[[t, 2, 1]],
    StringJoin[tensornames[[t, 3, 1]], "-", tensornames[[t, 3, 6]]}], Center],
  labely = If[Mod[t, 4] == 1, "Number of Genes", " "],
  g = BarChart[numbers[[t]],
    Frame -> True,
    Axes -> False,
    FrameLabel -> {labelx1, labely, labelx2, None},
    FrameTicks -> {framex, framey, None, None},
    GridLines -> {None, None},
    PlotRange -> {{0.5, 3 + 0.5}, {0, zgenes}},
    DisplayFunction -> Identity],
  g = FullGraphics[g],
  g[[1, 2]] = g[[1, 2]] /.
    Text[labely, {b_, c_}, {1., 0.}] ->
    Text[labely, {b - 1, c}, {0, 0}, {0, 1}],
  g[[1, 2]] = g[[1, 2]] /.
    Text[labelx1, {b_, c_}, {0., 1.}] ->
    Text[labelx1, {b, c - 600}, {0, 1}, {1, 0}],
  gnumbers[[t]] = Show[g,
    AspectRatio -> 0.9,
    PlotRange -> All,
    DisplayFunction -> Identity]],
  {t, 1, yarrays}]
```

```
(* Display Missing Data Counts *)
```

```
g = Show[GraphicsArray[Table[{GraphicsArray[Table[
  gnumbers[[a + 4 * b]], {a, 1, 4}], GraphicsSpacing -> -0.275]],
  {b, 0, 3}]], GraphicsSpacing -> -0.1575,
  PlotRange -> {{0, 1}, {0, 1}}];
Clear[gnumbers];
```

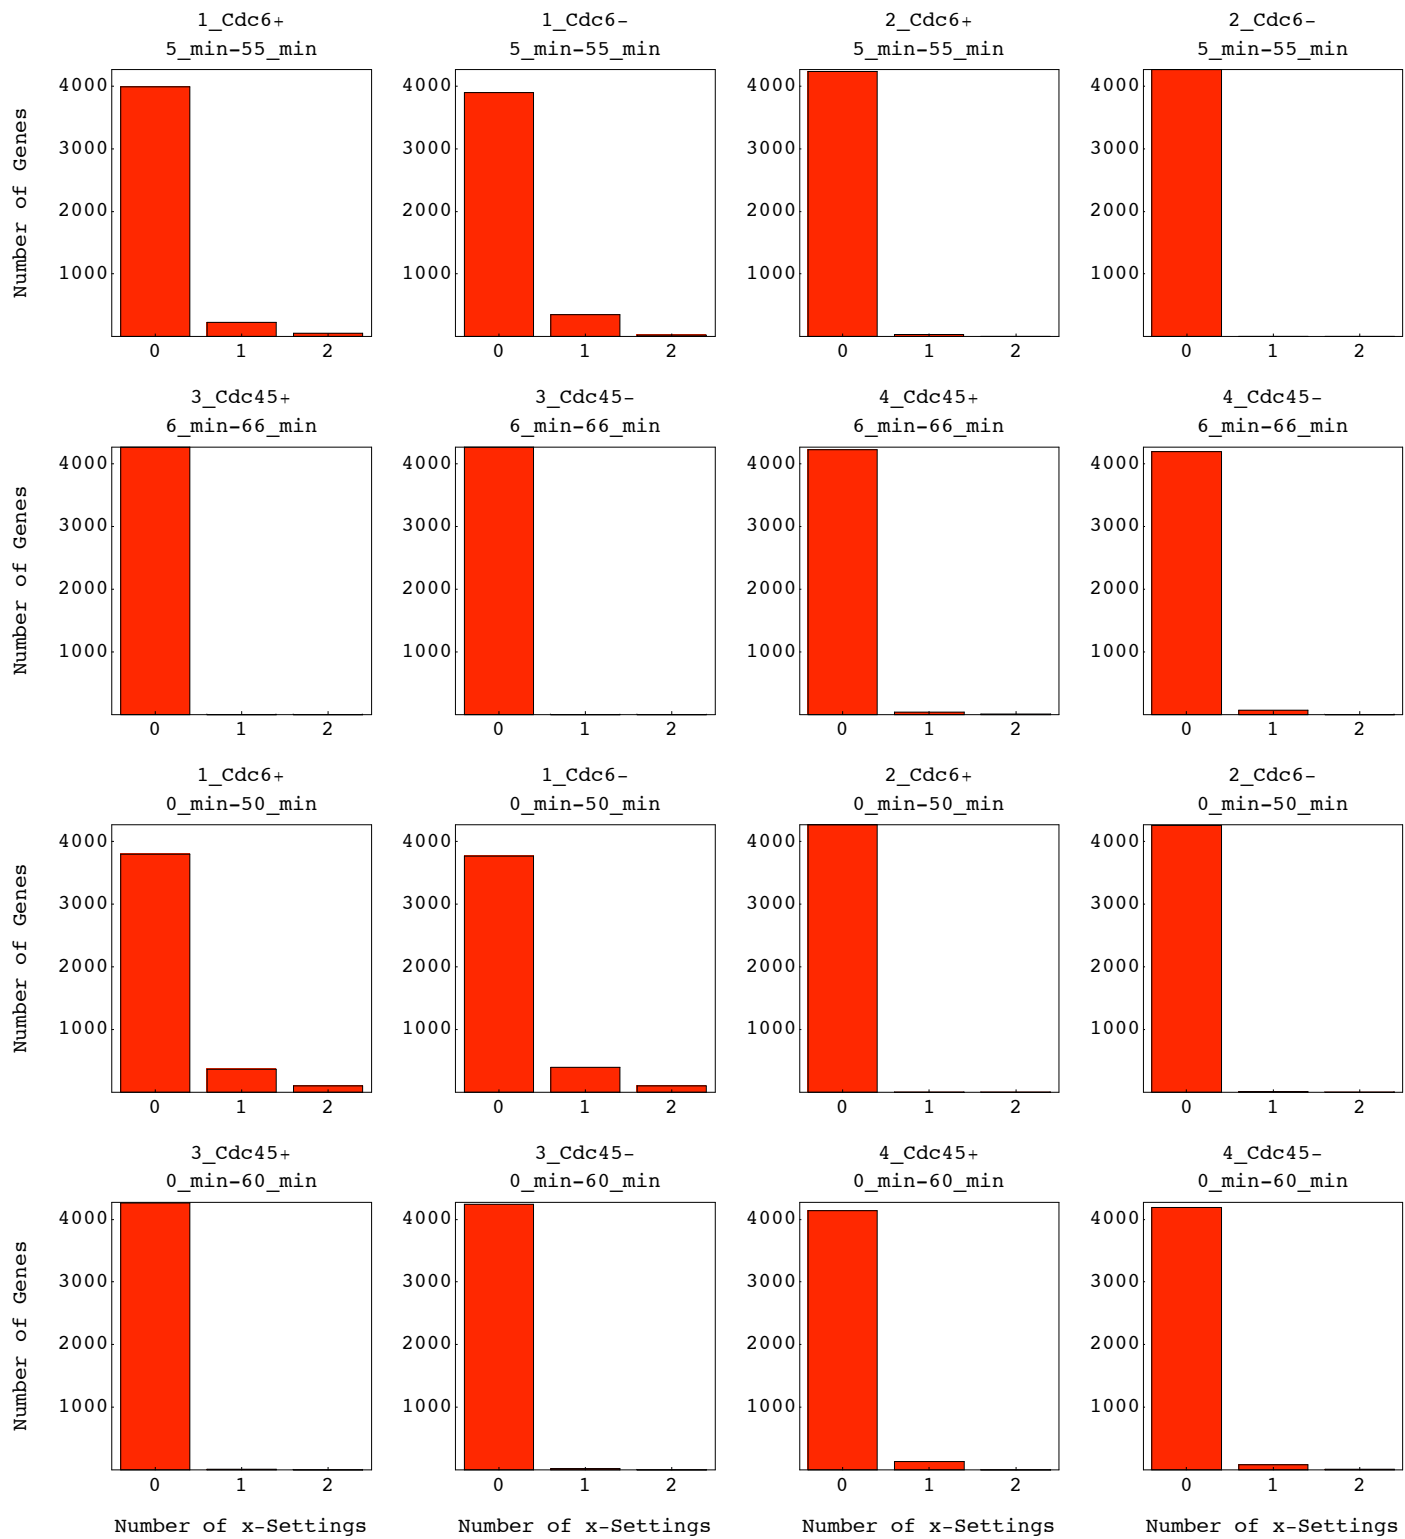

(\* Sort Genes by Number of Arrays with Missing Data \*)

```
fullgenenames = Table[0, {yarrays}];
missinggenenames1 = Table[0, {yarrays}];
missinggenenames2 = Table[0, {yarrays}];
fullmatrix = Table[0, {yarrays}];
missingmatrix1 = Table[0, {yarrays}];
missingmatrix2 = Table[0, {yarrays}];
Do[{
  matrix = AppendRows[Transpose[{counter[[t]]}], genenames, tensor[[t]]],
  matrix = Sort[matrix, OrderedQ[{#1, #2}] &],
  fullgenenames[[t]] = TakeColumns[
    TakeRows[matrix, {1, numbers[[t, 1]]}],
    {2, 2}],
  fullmatrix[[t]] = TakeColumns[
    TakeRows[matrix, {1, numbers[[t, 1]]}],
    {3, xarrays + 2}],
  missinggenenames1[[t]] = TakeColumns[
    TakeRows[matrix, {numbers[[t, 1]] + 1, numbers[[t, 1]] + numbers[[t, 2]]}],
    {2, 2}],
  missingmatrix1[[t]] = TakeColumns[
    TakeRows[matrix, {numbers[[t, 1]] + 1, numbers[[t, 1]] + numbers[[t, 2]]}],
    {3, xarrays + 2}],
  missinggenenames2[[t]] = TakeColumns[
    TakeRows[matrix,
      {numbers[[t, 1]] + numbers[[t, 2]] + 1,
      numbers[[t, 1]] + numbers[[t, 2]] + numbers[[t, 3]]}],
    {2, 2}],
  missingmatrix2[[t]] = TakeColumns[
    TakeRows[matrix,
      {numbers[[t, 1]] + numbers[[t, 2]] + 1,
      numbers[[t, 1]] + numbers[[t, 2]] + numbers[[t, 3]]}],
    {3, xarrays + 2}],
  {t, 1, yarrays}]
Clear[counter];
```

(\* Sort Genes by Position of Arrays with Missing Data \*)

```
locator1 = Table[0, {yarrays}];
locator2 = Table[0, {yarrays}];
Do[{
  locator1[[t]] = Table[0, {numbers[[t, 2]]}],
  Do[
    locator1[[t, a]] = locator1[[t, a]] + Flatten[Position[missingmatrix1[[t, a]], Null]],
    {a, 1, numbers[[t, 2]]}],
  locator2[[t]] = Table[0, {numbers[[t, 3]]}],
  Do[
    locator2[[t, a]] = locator2[[t, a]] + Flatten[Position[missingmatrix2[[t, a]], Null]],
    {a, 1, numbers[[t, 3]]}],
  missingmatrix1[[t]] = AppendRows[locator1[[t]], missinggenenames1[[t]], missingmatrix1[[t]],
  missingmatrix1[[t]] = Sort[missingmatrix1[[t]], OrderedQ[{#1, #2}] &],
  locator1[[t]] = TakeColumns[missingmatrix1[[t]], {1, 1}],
  missinggenenames1[[t]] = TakeColumns[missingmatrix1[[t]], {2, 2}],
  missingmatrix1[[t]] = TakeColumns[missingmatrix1[[t]], {3, xarrays + 2}],
  missingmatrix2[[t]] = AppendRows[locator2[[t]], missinggenenames2[[t]], missingmatrix2[[t]],
  missingmatrix2[[t]] = Sort[missingmatrix2[[t]], OrderedQ[{#1, #2}] &],
  locator2[[t]] = TakeColumns[missingmatrix2[[t]], {1, 2}],
  missinggenenames2[[t]] = TakeColumns[missingmatrix2[[t]], {3, 3}],
  missingmatrix2[[t]] = TakeColumns[missingmatrix2[[t]], {4, xarrays + 3}],
  {t, 1, yarrays}]
```

```
(* Calculate SVD Before Missing Data Estimation *)
```

```
fulleigenenes = Table[0, {yarrays}];  
fullfractions = Table[0, {yarrays}];  
fullentropy = Table[0, {yarrays}];  
Do[{{eigenarrays, eigenexpressions, fulleigenenes[[t]]} = SingularValues[fullmatrix[[t]],  
  fullfractions[[t]] = eigenexpressions^2 / Sum[eigenexpressions[[a]]^2, {a, 1, xarrays}},  
  fullentropy[[t]] =  
    -N[Round[100 * Sum[fullfractions[[t, a]] * Log[fullfractions[[t, a]]],  
      {a, 1, xarrays}] / Log[xarrays]] / 100}},  
{t, 1, yarrays}]
```

```
(* Estimate Missing Data Using the Most Significant Eigengene *)
```

```
Do[  
  Do[  
    missingmatrix1[[t, a, locator1[[t, a, 1]]]] =  
      N[Round[Flatten[Dot[Dot[  
        Transpose[Drop[  
          Transpose[{missingmatrix1[[t, a]]}],  
            {locator1[[t, a, 1]]}],  
        PseudoInverse[Transpose[Drop[  
          Transpose[{fulleigenenes[[t, 1]]}],  
            {locator1[[t, a, 1]]}],  
          {fulleigenenes[[t, 1]]}][[locator1[[t, a, 1]]] * 100] / 100],  
        {a, 1, numbers[[t, 2]]}],  
    Do[Do[  
      missingmatrix2[[t, a, locator2[[t, a, b]]]] =  
        N[Round[Flatten[Dot[Dot[  
          Transpose[Drop[Drop[  
            Transpose[{missingmatrix2[[t, a]]}],  
              {locator2[[t, a, 2]]}], {locator2[[t, a, 1]]}],  
          PseudoInverse[Transpose[Drop[Drop[  
            Transpose[{fulleigenenes[[t, 1]]}],  
              {locator2[[t, a, 2]]}], {locator2[[t, a, 1]]}],  
            {fulleigenenes[[t, 1]]}][[locator2[[t, a, b]]] * 100] / 100],  
          {b, 1, 2}],  
      {a, 1, numbers[[t, 3]]}],  
    fullmatrix[[t]] = AppendRows[fullgenenames[[t]], fullmatrix[[t]],  
    missingmatrix1[[t]] = AppendRows[missinggenenames1[[t]], missingmatrix1[[t]],  
    missingmatrix2[[t]] = AppendRows[missinggenenames2[[t]], missingmatrix2[[t]],  
    If[Dimensions[missingmatrix1[[t]]] == {2},  
      tensor[[t]] = fullmatrix[[t]],  
      tensor[[t]] = AppendColumns[fullmatrix[[t]], missingmatrix1[[t]],  
    If[Dimensions[missingmatrix2[[t]]] == {2},  
      tensor[[t]] = tensor[[t]],  
      tensor[[t]] = AppendColumns[tensor[[t]], missingmatrix2[[t]],  
    tensor[[t]] = TakeColumns[  
      Sort[tensor[[t]], OrderedQ[{{#1, #2}}] &],  
      {2, xarrays + 1}],  
    {t, 1, yarrays}]  
Clear[fullmatrix, missingmatrix1, missingmatrix2, locator1, locator2, numbers];
```

```
(* Calculate SVD After Missing Data Estimation *)
```

```
eigenenes = Table[0, {yarrays}];  
fractions = Table[0, {yarrays}];  
entropy = Table[0, {yarrays}];  
Do[{{eigenarrays, eigenexpressions, eigenenes[[t]]} = SingularValues[tensor[[t]],  
  fractions[[t]] = eigenexpressions^2 / Sum[eigenexpressions[[a]]^2, {a, 1, xarrays}], entropy[[t]] =  
    -N[Round[100 * Sum[fractions[[t, a]] * Log[fractions[[t, a]]], {a, 1, xarrays}] / Log[xarrays]] / 100}},  
{t, 1, yarrays}]
```

```
(* Display SVD Before and After Missing Data Estimation *)
```

```
(* Create Bar Chart Display of Fractions Before Missing Data Estimation *)
```

```
g2 = Table[0, {yarrays}];
gridx = Table[a, {a, 0, 1, 0.2}];
framex = Table[{gridx[[a]], gridx[[a]]}, {a, 1, 6}];
framey[[6]] = {1, "1"};
gridx = Table[{gridx[[a]], RGBColor[0, 0, 0]}, {a, 1, 6}];
framey = Table[{a + 1, xarrays - a}, {a, 0, xarrays - 1}];
Do[{
  labelx = ColumnForm[
    {"(b) Eigenexpression Fraction",
     DisplayForm[RowBox[{SubsuperscriptBox["d", t, "/"], " = ", ToString[fullentropy[[t]]}], " "],
    Center],
  g = BarChart[
    Table[fullfractions[[t, xarrays - a]], {a, 0, xarrays - 1}],
    BarOrientation -> Horizontal,
    PlotRange -> {{0, 1.0001}, {0.5, xarrays + 0.5}},
    AspectRatio -> 1,
    Axes -> False,
    Frame -> True,
    FrameTicks -> {None, framey, framex, None},
    FrameLabel -> {None, None, labelx, None},
    GridLines -> {gridx, None},
    DisplayFunction -> Identity],
  g = FullGraphics[g],
  g[[1, 2]] = g[[1, 2]] /.
    Text[labelx, {b_, c_}, {0., -1.}] ->
    Text[labelx, {b, c + 0.95}, {0, -1}, {1, 0}],
  g[[1, 2]] = g[[1, 2]] /.
    Text[a_, {b_, c_}, {0., -1.}] ->
    Text[a, {b, c}, {0, -1}, {0, 1}],
  g2[[t]] = Show[g,
    AspectRatio -> 1.35,
    PlotRange -> All,
    DisplayFunction -> Identity]],
{t, 1, yarrays}]
```



(\* Create Bar Chart Display of Fractions After Missing Data Estimation \*)

```

g5 = Table[0, {yarrays}];
gridx = Table[a, {a, 0, 1, 0.2}];
framex = Table[{gridx[[a]], gridx[[a]]}, {a, 1, 6}];
framex[[6]] = {1, "1"};
gridx = Table[{gridx[[a]], RGBColor[0, 0, 0]}, {a, 1, 6}];
framey = Table[{a + 1, xarrays - a}, {a, 0, xarrays - 1}];
Do[{
  labelx = ColumnForm[
    {"(e) Eigenexpression Fraction",
     DisplayForm[RowBox[{SubsuperscriptBox["d", t, ""], " = ", ToString[entropy[[t]]}], " "],
    Center],
  g = BarChart[
    Table[fractions[[t, xarrays - a]], {a, 0, xarrays - 1}],
    BarOrientation -> Horizontal,
    PlotRange -> {{0, 1.0001}, {0.5, xarrays + 0.5}},
    AspectRatio -> 1,
    Axes -> False,
    Frame -> True,
    FrameTicks -> {None, framey, framex, None},
    FrameLabel -> {None, None, labelx, None},
    GridLines -> {gridx, None},
    DisplayFunction -> Identity],
  g = FullGraphics[g],
  g[[1, 2]] = g[[1, 2]] /.
    Text[labelx, {b_, c_}, {0., -1.}] ->
    Text[labelx, {b, c + 0.95}, {0, -1}, {1, 0}],
  g[[1, 2]] = g[[1, 2]] /.
    Text[a_, {b_, c_}, {0., -1.}] ->
    Text[a, {b, c}, {0, -1}, {0, 1}],
  g5[[t]] = Show[g,
    AspectRatio -> 1.35,
    PlotRange -> All,
    DisplayFunction -> Identity]],
{t, 1, yarrays}]

```

(\* Create 2D Red & Green Raster Display of x-Eigenenes Before Missing Data Estimation \*)

```

g1 = Table[0, {yarrays}];
contrast = 3.5;
framey = Table[{a + 1 - 0.5, xarrays - a}, {a, 0, xarrays - 1}];
labely = "x-Eigenenes";
labelx = ColumnForm[{"(a) x-Settings", " ", " "}, Center];
Do[{
  displaying = Table[
    If[contrast * fulleigenenes[[t, i, j]] > 0,
      If[contrast * fulleigenenes[[t, i, j]] < 1, {contrast * fulleigenenes[[t, i, j]], 0}, {1, 0}],
      If[contrast * fulleigenenes[[t, i, j]] > -1, {0, -contrast * fulleigenenes[[t, i, j]]}, {0, 1}]],
    {i, 1, xarrays}, {j, 1, xarrays}],
  framex = Table[{a - 0.5, tensornames[[t, 3, a]]}, {a, 1, xarrays}],
  g = Show[
    Graphics[
      RasterArray[
        Table[
          RGBColor[displaying[[i, j, 1]], displaying[[i, j, 2]], 0],
          {i, xarrays, 1, -1}, {j, 1, xarrays}]]],
    AspectRatio -> 1,
    Frame -> True,
    FrameTicks -> {None, framey, framex, None},
    FrameLabel -> {None, labely, labelx, None},
    DisplayFunction -> Identity],
  g = FullGraphics[g],
  g[[1, 2]] = g[[1, 2]] /.
    Text[labely, {b_, c_}, {1., 0.}] ->
    Text[labely, {b - 1.2, c}, {0, 0}, {0, 1}],
  g[[1, 2]] = g[[1, 2]] /.
    Text[labelx, {b_, c_}, {0., -1.}] ->
    Text[labelx, {b, c + 1}, {0, -1}, {1, 0}],
  g[[1, 2]] = g[[1, 2]] /.
    Text[a_, {b_, c_}, {0., -1.}] ->
    Text[a, {b, c}, {0, -1}, {0, 1}],
  g1[[t]] = Show[g,
    AspectRatio -> 1.05,
    PlotRange -> All,
    DisplayFunction -> Identity]],
{t, 1, yarrays}]

```

(\* Create 2D Red & Green Raster Display of x-Eigenenes After Missing Data Estimation \*)

```

g4 = Table[0, {yarrays}];
contrast = 3.5;
framey = Table[{a + 1 - 0.5, xarrays - a}, {a, 0, xarrays - 1}];
labely = "x-Eigenenes";
labelx = ColumnForm[{"(d) x-Settings", " ", " "}, Center];
Do[{
  displaying = Table[
    If[contrast * eigengenes[[t, i, j]] > 0,
      If[contrast * eigengenes[[t, i, j]] < 1, {contrast * eigengenes[[t, i, j]], 0}, {1, 0}],
      If[contrast * eigengenes[[t, i, j]] > -1, {0, -contrast * eigengenes[[t, i, j]]}, {0, 1}]],
    {i, 1, xarrays}, {j, 1, xarrays}],
  framex = Table[{a - 0.5, tensornames[[t, 3, a]]}, {a, 1, xarrays}],
  g = Show[
    Graphics[
      RasterArray[
        Table[
          RGBColor[displaying[[i, j, 1]], displaying[[i, j, 2]], 0],
          {i, xarrays, 1, -1}, {j, 1, xarrays}]]],
    AspectRatio -> 1,
    Frame -> True,
    FrameTicks -> {None, framey, framex, None},
    FrameLabel -> {None, labely, labelx, None},
    DisplayFunction -> Identity],
  g = FullGraphics[g],
  g[[1, 2]] = g[[1, 2]] /.
    Text[labely, {b_, c_}, {1., 0.}] ->
    Text[labely, {b - 1.2, c}, {0, 0}, {0, 1}],
  g[[1, 2]] = g[[1, 2]] /.
    Text[labelx, {b_, c_}, {0., -1.}] ->
    Text[labelx, {b, c + 1}, {0, -1}, {1, 0}],
  g[[1, 2]] = g[[1, 2]] /.
    Text[a_, {b_, c_}, {0., -1.}] ->
    Text[a, {b, c}, {0, -1}, {0, 1}],
  g4[[t]] = Show[g,
    AspectRatio -> 1.05,
    PlotRange -> All,
    DisplayFunction -> Identity]],
{t, 1, yarrays}]

```

(\* Create Graph Display of Selected x-Eigenenes Before Missing Data Estimation \*)

```

g3 = Table[0, {yarrays}];
p = Table[0, {3}];
color = {RGBColor[1, 0, 0], RGBColor[0, 0, 1], RGBColor[0, 0.5, 0]};
framey = {-1, -0.5, 0, 0.5, 1};
labelx = "(c) x-Settings";
labely = ColumnForm[{" ", "Expression Level"}, Center];
Do[{
  framex = Table[{a - 1, tensornames[[t, 3, a]]}, {a, 1, xarrays}],
  Do[{
    coordinates = Table[{a - 1, fulleigenenes[[t, n, a]]}, {a, 1, xarrays}],
    points = Table[Point[coordinates[[a]]], {a, 1, xarrays}],
    line = Line[coordinates],
    g = Show[
      {Graphics[{color[[n]], PointSize[0.022], points}],
       Graphics[{color[[n]], Thickness[0.0044], line}]},
      Frame -> True,
      FrameLabel -> {None, labely, labelx, None},
      FrameTicks -> {None, framey, framex, None},
      PlotRange -> {-1.05, 1.05},
      GridLines -> {None, {{0, RGBColor[0, 0, 0]}}},
      DisplayFunction -> Identity],
    g = FullGraphics[g],
    g[[1, 2]] = g[[1, 2]] /.
      Text[labely, {b_, c_}, {1., 0.}] ->
      Text[labely, {b - 1.25, c}, {0, 0}, {0, 1}],
    g[[1, 2]] = g[[1, 2]] /.
      Text[labelx, {b_, c_}, {0., -1.}] ->
      Text[labelx, {b, c + 0.6}, {0, -1}, {1, 0}],
    g[[1, 2]] = g[[1, 2]] /.
      Text[a_, {b_, c_}, {0., -1.}] ->
      Text[a, {b, c}, {0, -1}, {0, 1}],
    p[[n]] = Show[g,
      AspectRatio -> 1.05,
      PlotRange -> All,
      DisplayFunction -> Identity]],
  {n, 1, 3}],
g3[[t]] = Show[{p[[3]], p[[2]], p[[1]]},
  AspectRatio -> 1.05,
  PlotRange -> All,
  DisplayFunction -> Identity]],
{t, 1, yarrays}
Clear[fullentropy, fullfractions, fulleigenenes];

```

(\* Create Graph Display of Selected x-Eigengenes After Missing Data Estimation \*)

```

g6 = Table[0, {yarrays}];
p = Table[0, {3}];
color = {RGBColor[1, 0, 0], RGBColor[0, 0, 1], RGBColor[0, 0.5, 0]};
framey = {-1, -0.5, 0, 0.5, 1};
labelx = "(f) x-Settings";
labely = ColumnForm[{" ", "Expression Level"}, Center];

Do[{
  framex = Table[{a - 1, tensornames[[t, 3, a]]}, {a, 1, xarrays}],
  Do[{
    coordinates = Table[{a - 1, eigengenes[[t, n, a]]}, {a, 1, xarrays}],
    points = Table[Point[coordinates[[a]]], {a, 1, xarrays}],
    line = Line[coordinates],
    g = Show[
      {Graphics[{color[[n]], PointSize[0.022], points}],
      Graphics[{color[[n]], Thickness[0.0044], line}]},
      Frame -> True,
      FrameLabel -> {None, labely, labelx, None},
      FrameTicks -> {None, framey, framex, None},
      PlotRange -> {-1.05, 1.05},
      GridLines -> {None, {{0, RGBColor[0, 0, 0]}}},
      DisplayFunction -> Identity],
    g = FullGraphics[g],
    g[[1, 2]] = g[[1, 2]] /.
      Text[labely, {b_, c_}, {1., 0.}] ->
      Text[labely, {b - 1.25, c}, {0, 0}, {0, 1}],
    g[[1, 2]] = g[[1, 2]] /.
      Text[labelx, {b_, c_}, {0., -1.}] ->
      Text[labelx, {b, c + 0.6}, {0, -1}, {1, 0}],
    g[[1, 2]] = g[[1, 2]] /.
      Text[a_, {b_, c_}, {0., -1.}] ->
      Text[a, {b, c}, {0, -1}, {0, 1}],
    p[[n]] = Show[g,
      AspectRatio -> 1.05,
      PlotRange -> All,
      DisplayFunction -> Identity]],
  {n, 1, 3}],
g6[[t]] = Show[{p[[3]], p[[2]], p[[1]]},
  AspectRatio -> 1.05,
  PlotRange -> All,
  DisplayFunction -> Identity}],
{t, 1, yarrays}]
Clear[entropy, fractions, eigengenes];

```

(\* Display x-Eigengenes, Fractions and Selected x-Eigengenes \*)

```

Do[
  Show[GraphicsArray[{
    {GraphicsArray[{g1[[t]], g2[[t]], g3[[t]]}, GraphicsSpacing -> -0.15]},
    {GraphicsArray[{g4[[t]], g5[[t]], g6[[t]]}, GraphicsSpacing -> -0.15}]},
  GraphicsSpacing -> 0,
  PlotLabel -> ColumnForm[{" ", tensornames[[t, 2, 1]],
    StringJoin[tensornames[[t, 3, 1]], "-", tensornames[[t, 3, 6]]}], Center],
  PlotRange -> {{0.032, 0.968}, {0, 0.775}},
  {t, 1, yarrays}]
Clear[g1, g2, g3, g4, g5, g6];

```

1\_Cdc6+  
5\_min-55\_min

(a) x-Settings

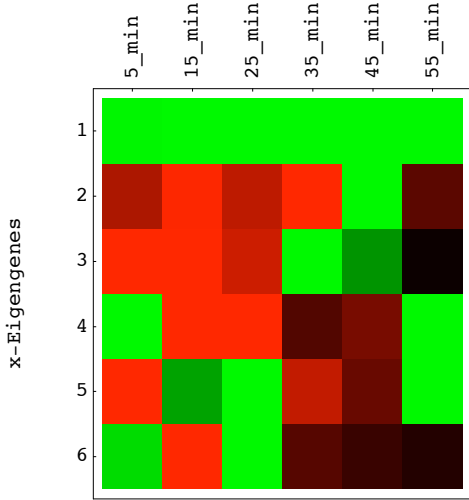

(b) Eigenexpression Fraction  
 $d_1 = 0.74$

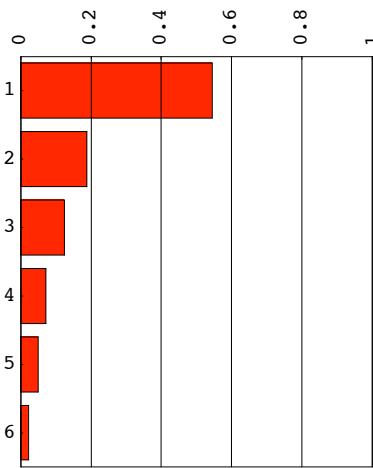

(c) x-Settings

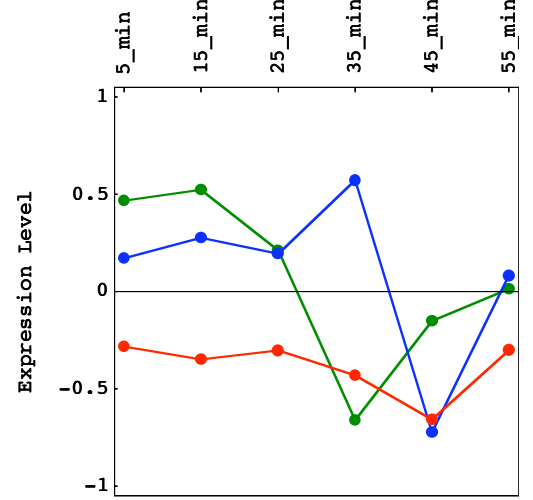

(d) x-Settings

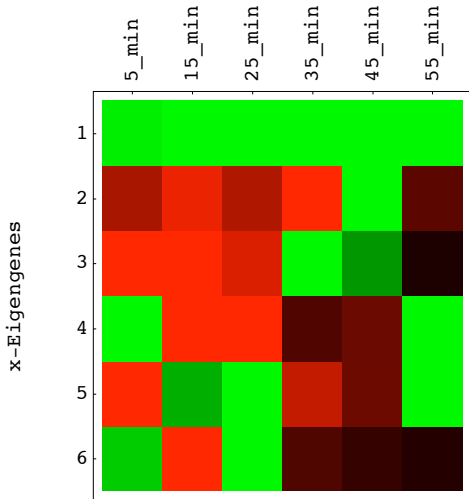

(e) Eigenexpression Fraction  
 $d_1 = 0.75$

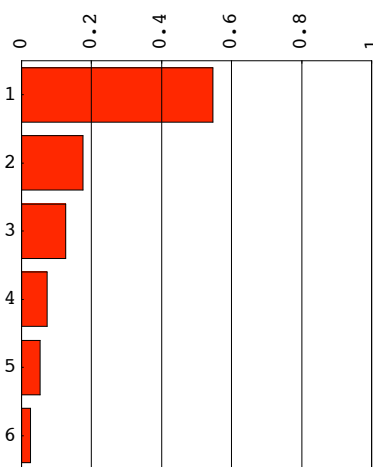

(f) x-Settings

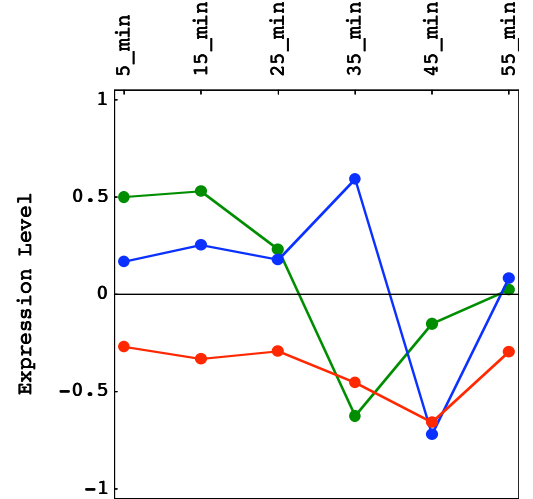

1\_Cdc6-  
5\_min-55\_min

(a) x-Settings

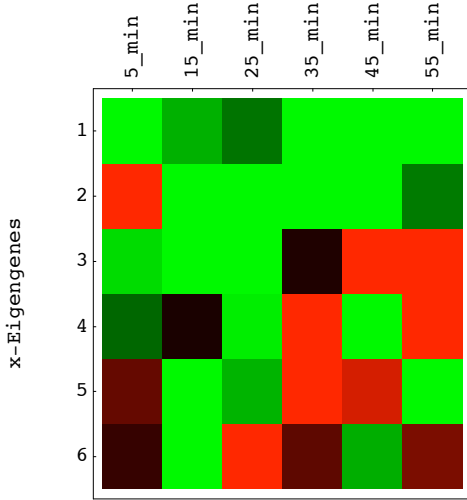

(b) Eigenexpression Fraction  
 $d_2 = 0.64$

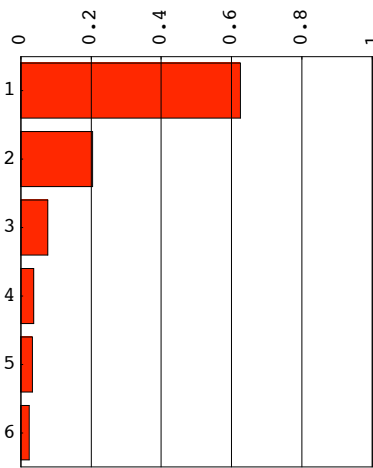

(c) x-Settings

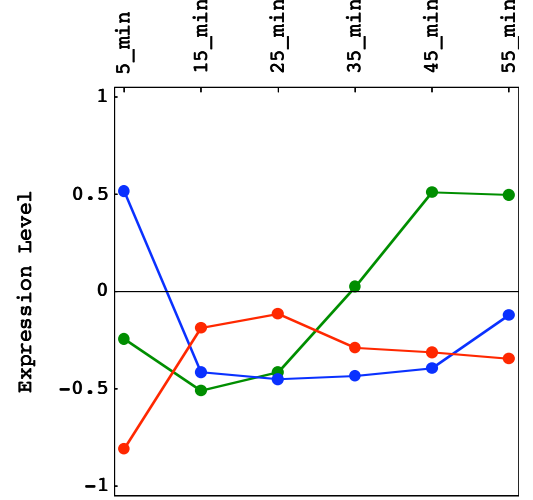

(d) x-Settings

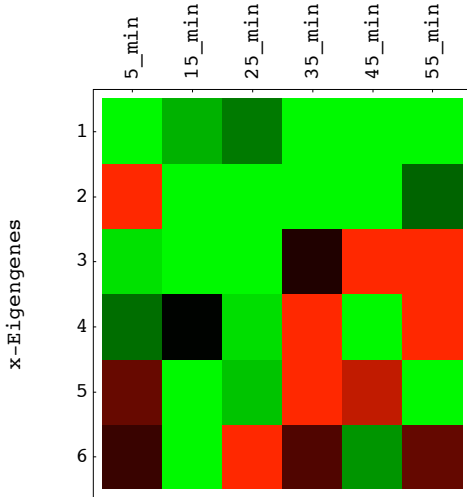

(e) Eigenexpression Fraction  
 $d_2 = 0.64$

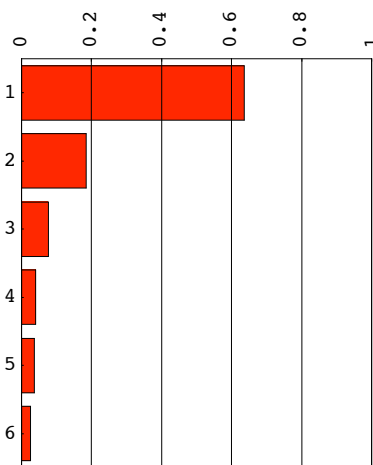

(f) x-Settings

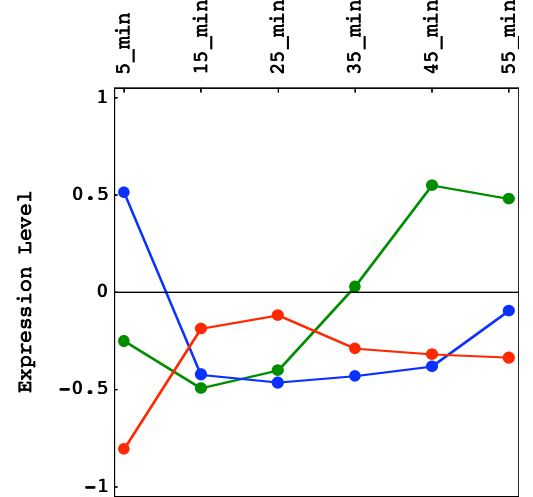

2\_Cdc6+  
5\_min-55\_min

(a) x-Settings

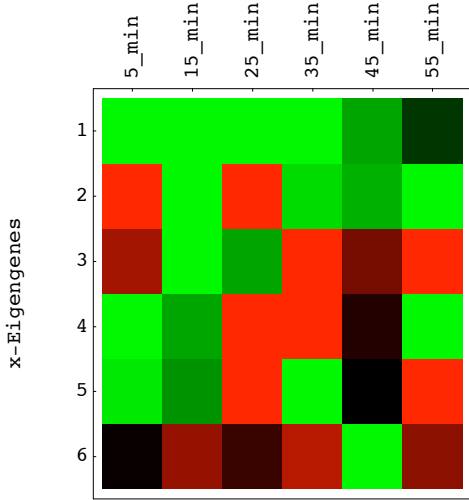

(b) Eigenexpression Fraction  
 $d_3 = 0.58$

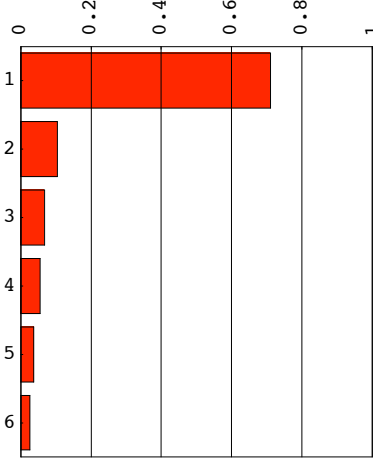

(c) x-Settings

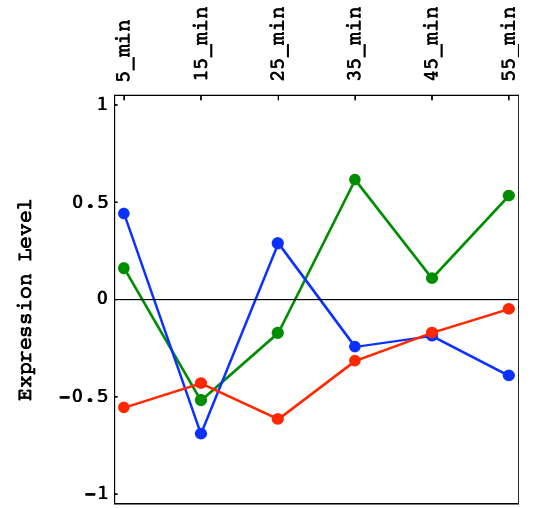

(d) x-Settings

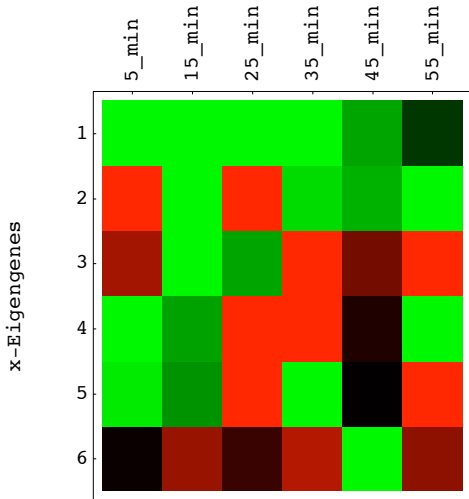

(e) Eigenexpression Fraction  
 $d_3 = 0.58$

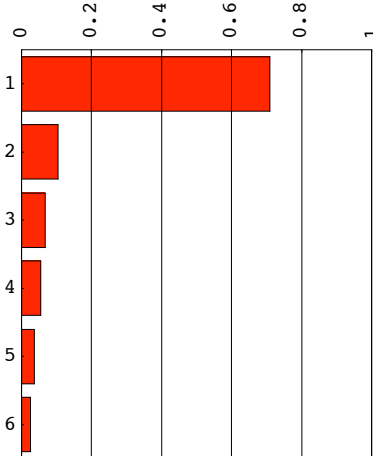

(f) x-Settings

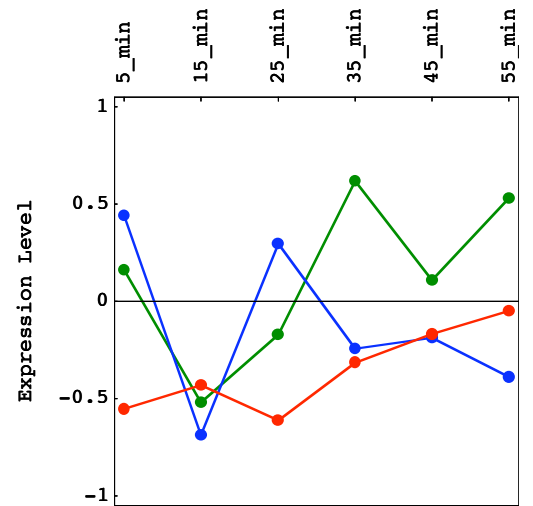



2\_Cdc6-  
5\_min-55\_min

(a) x-Settings

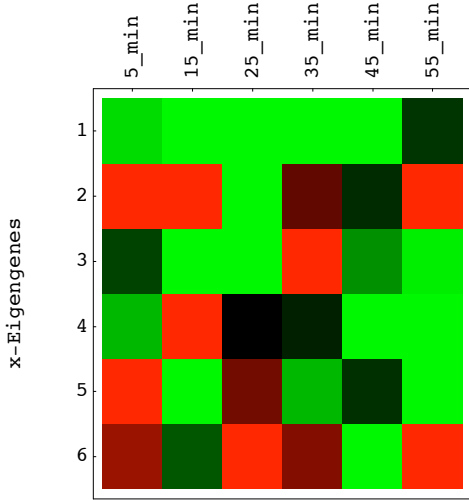

(b) Eigenexpression Fraction  
 $d_4' = 0.7$

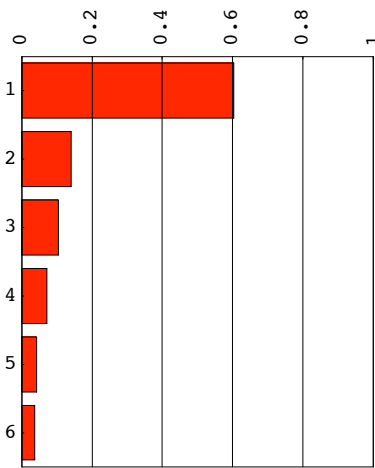

(c) x-Settings

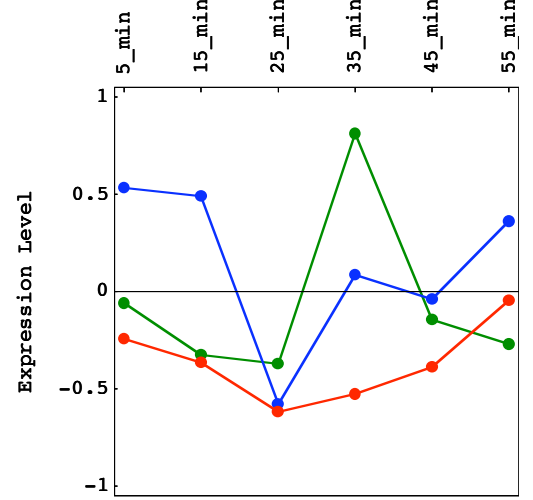

(d) x-Settings

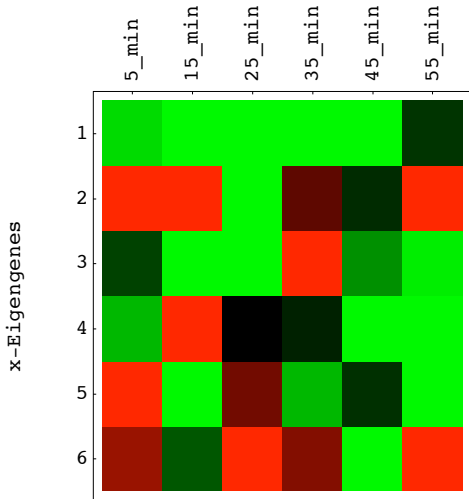

(e) Eigenexpression Fraction  
 $d_4' = 0.7$

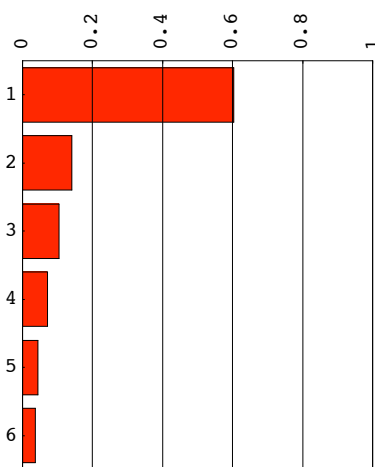

(f) x-Settings

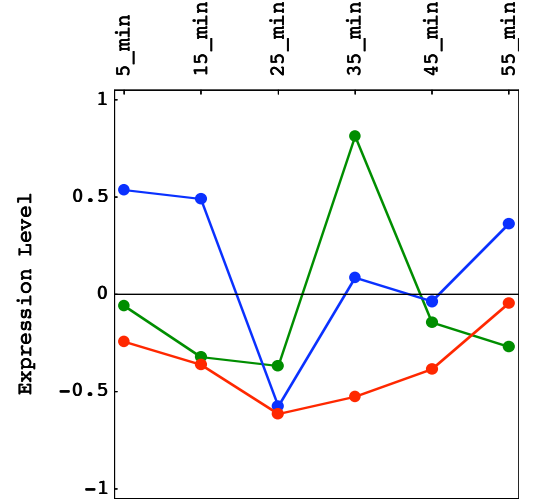

3\_Cdc45+  
6\_min-66\_min

(a) x-Settings

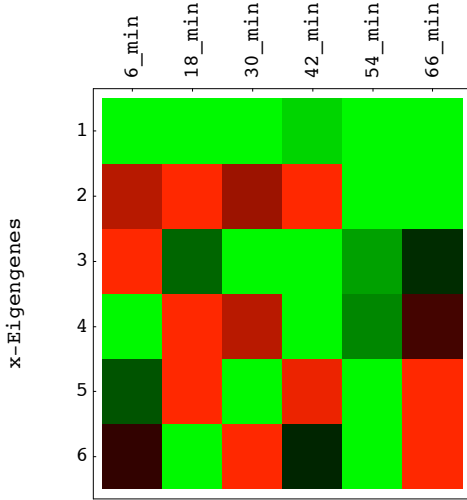

(b) Eigenexpression Fraction  
 $d_5 = 0.56$

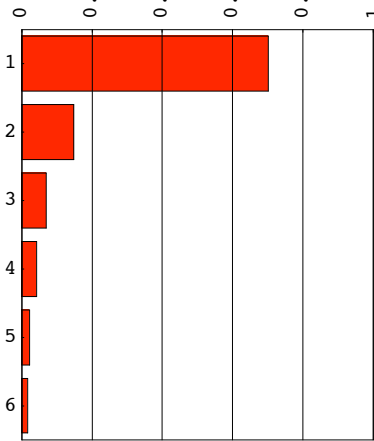

(c) x-Settings

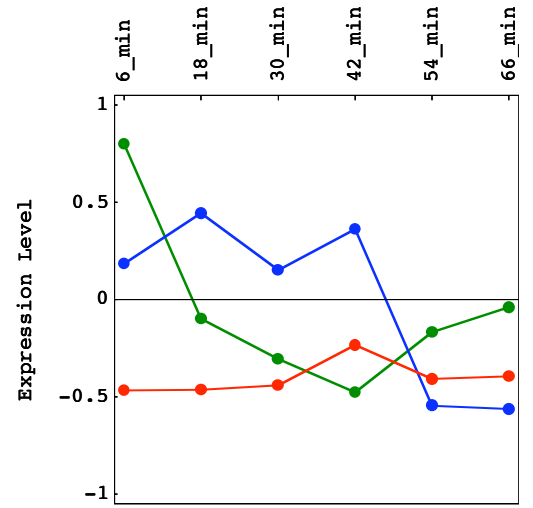

(d) x-Settings

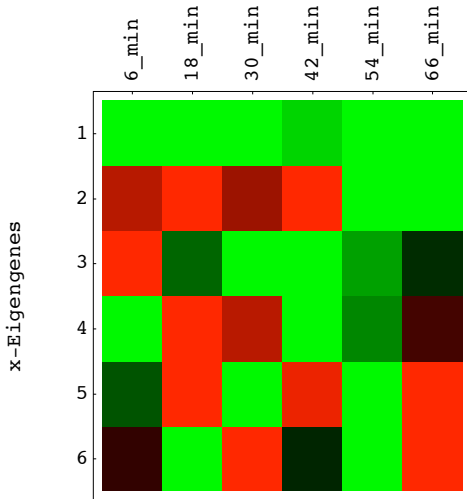

(e) Eigenexpression Fraction  
 $d_5 = 0.56$

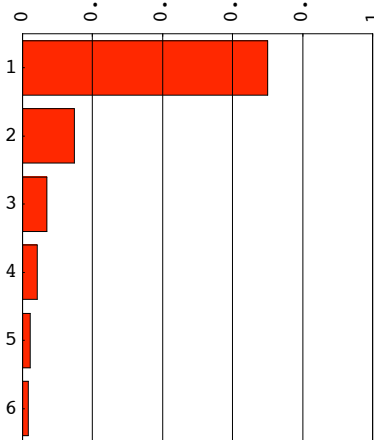

(f) x-Settings

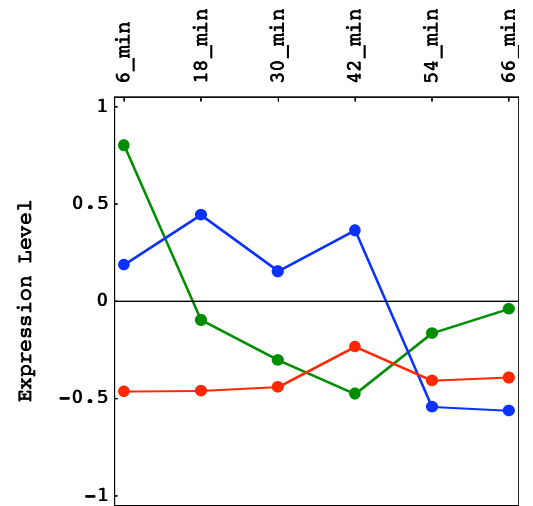

3\_Cdc45-  
6\_min-66\_min

(a) x-Settings

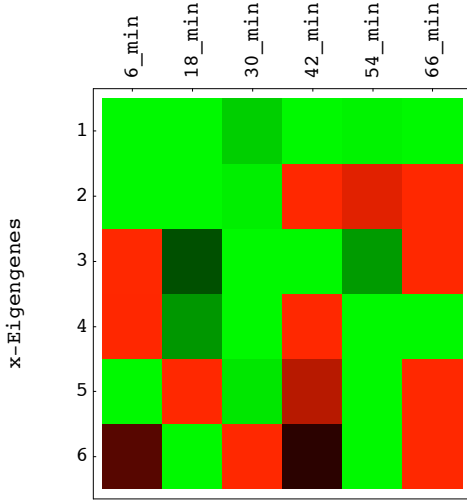

(b) Eigenexpression Fraction  
 $d_6' = 0.56$

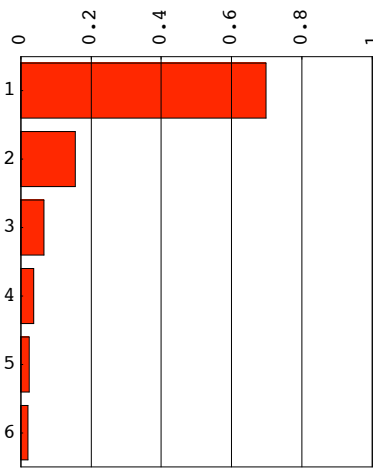

(c) x-Settings

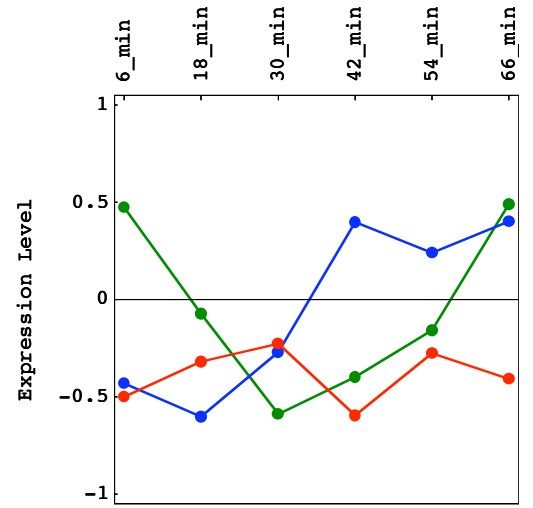

(d) x-Settings

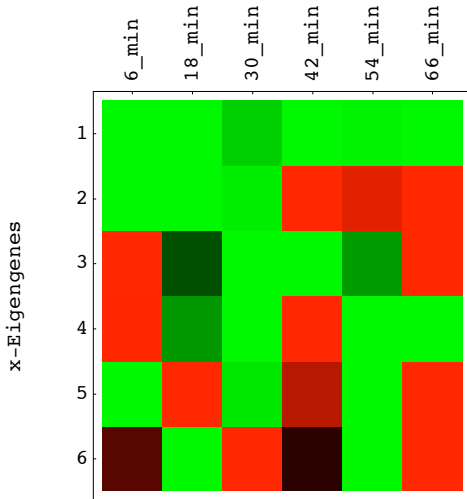

(e) Eigenexpression Fraction  
 $d_6' = 0.56$

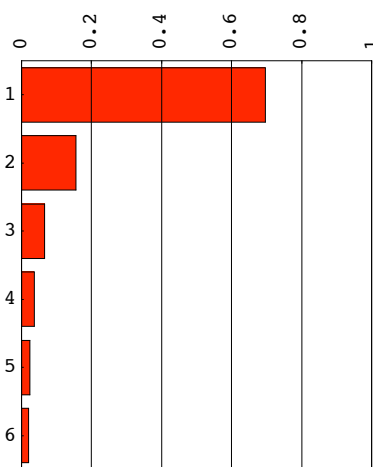

(f) x-Settings

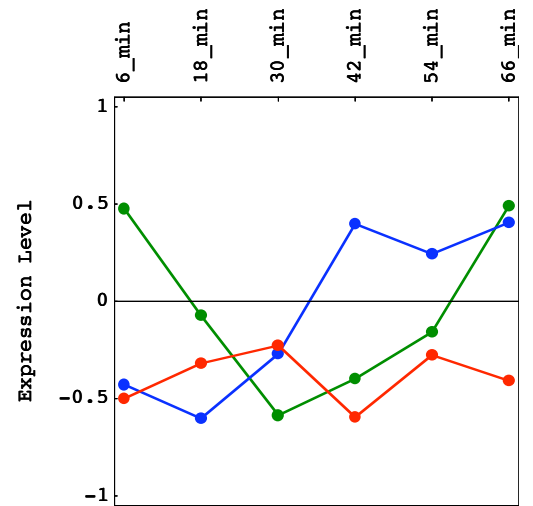

4\_Cdc45+  
6\_min-66\_min

(a) x-Settings

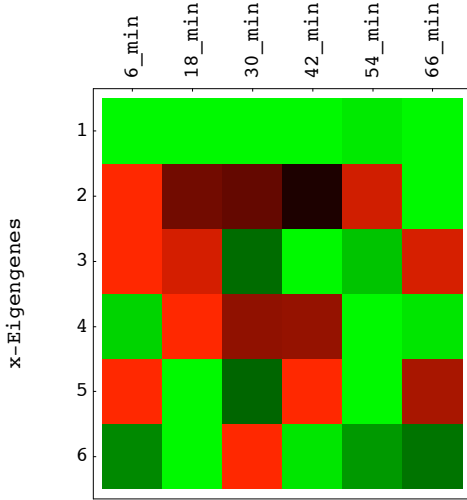

(b) Eigenexpression Fraction  
 $d_7 = 0.52$

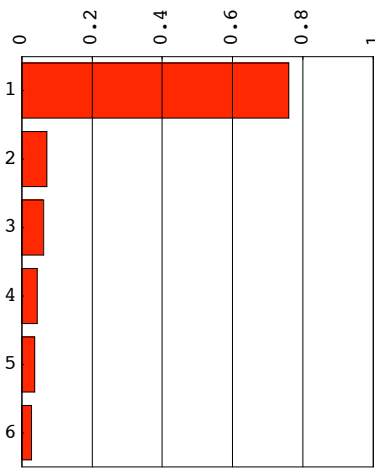

(c) x-Settings

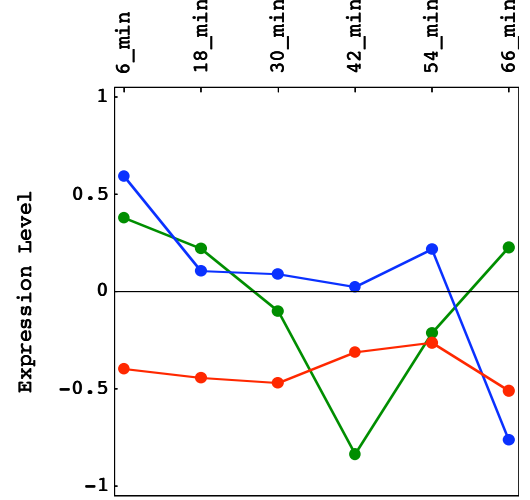

(d) x-Settings

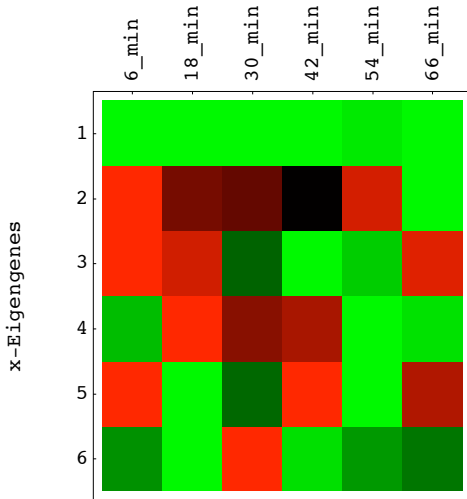

(e) Eigenexpression Fraction  
 $d_7 = 0.52$

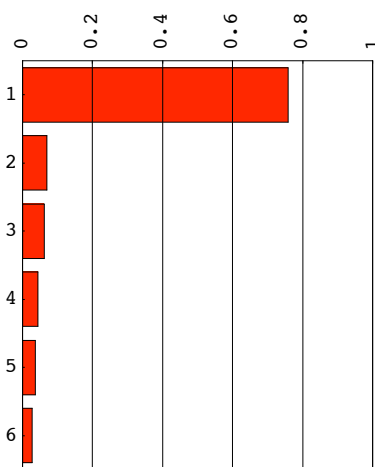

(f) x-Settings

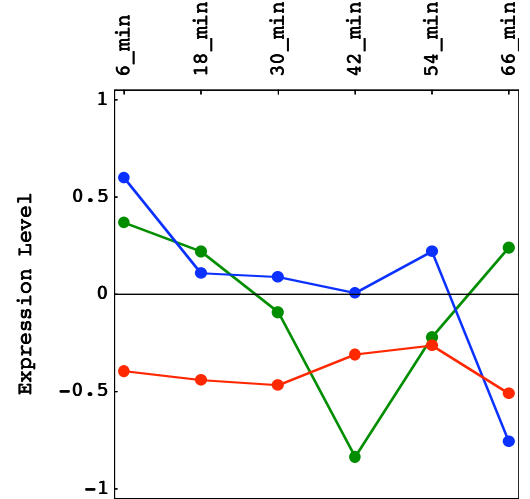

4\_Cdc45-  
6\_min-66\_min

(a) x-Settings

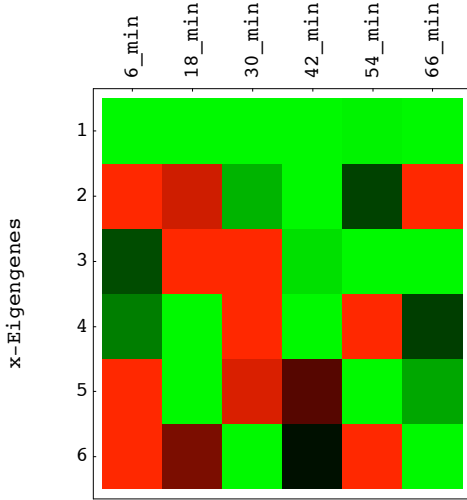

(b) Eigenexpression Fraction  
 $d_8^c = 0.47$

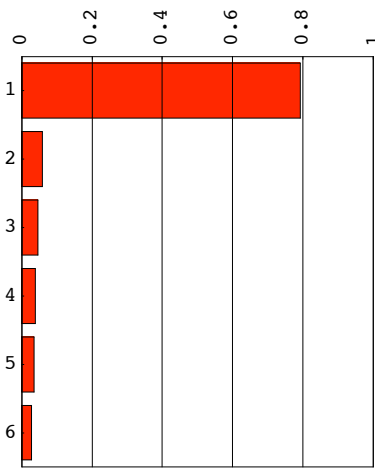

(c) x-Settings

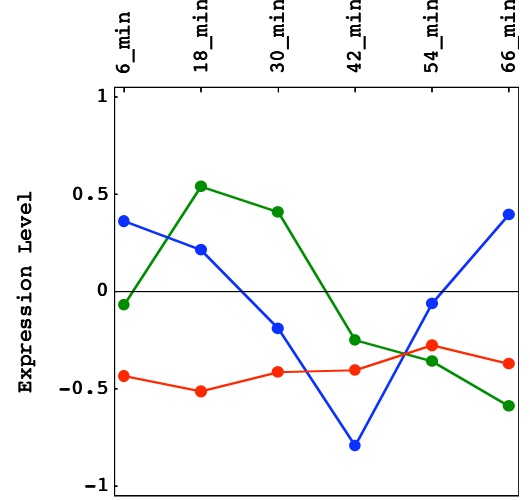

(d) x-Settings

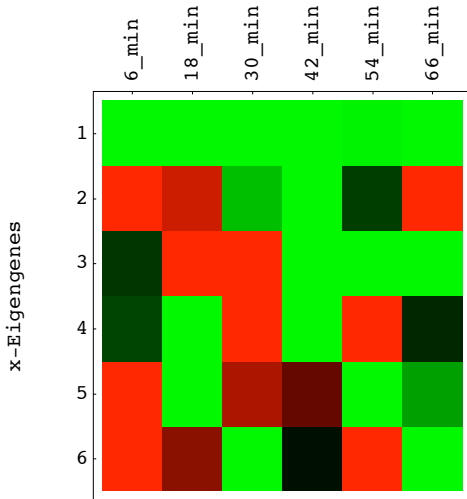

(e) Eigenexpression Fraction  
 $d_8^c = 0.47$

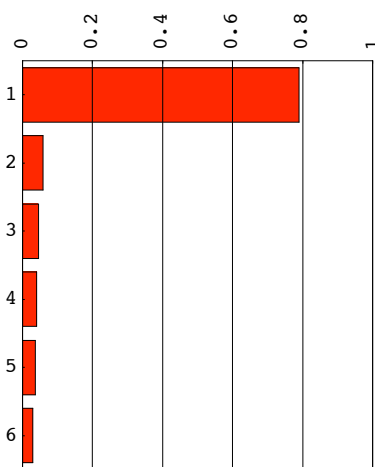

(f) x-Settings

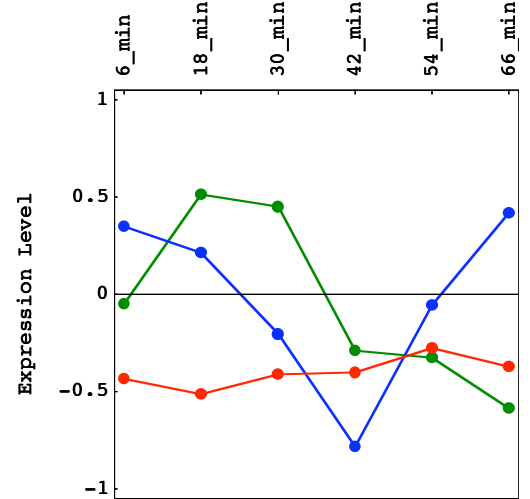

1\_Cdc6+  
0\_min-50\_min

(a) x-Settings

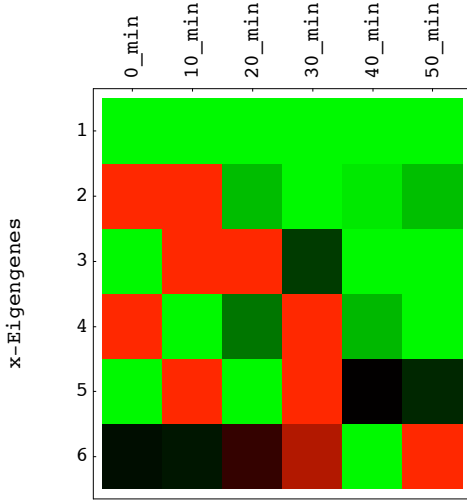

(b) Eigenexpression Fraction  
 $d_0 = 0.61$

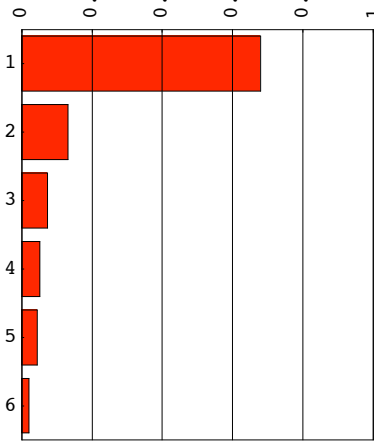

(c) x-Settings

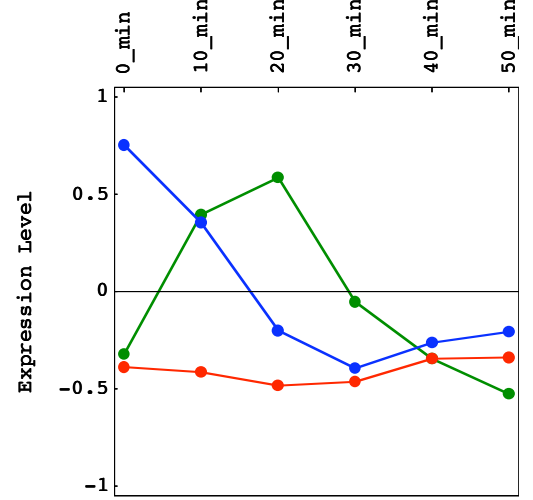

(d) x-Settings

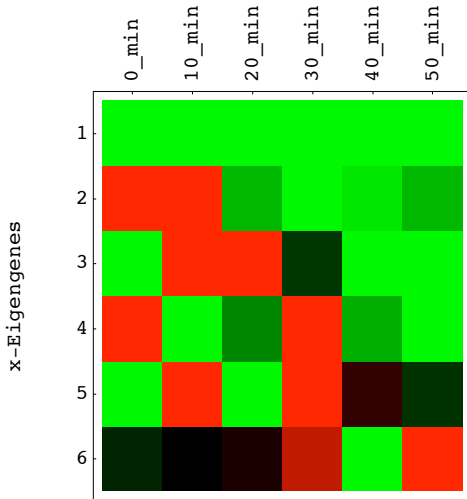

(e) Eigenexpression Fraction  
 $d_0 = 0.63$

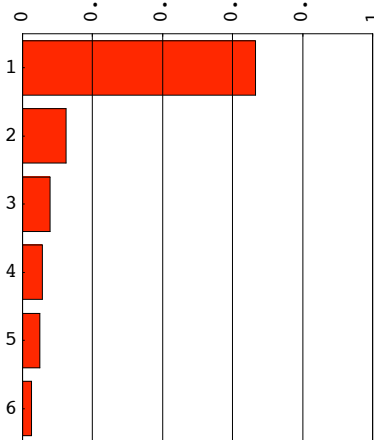

(f) x-Settings

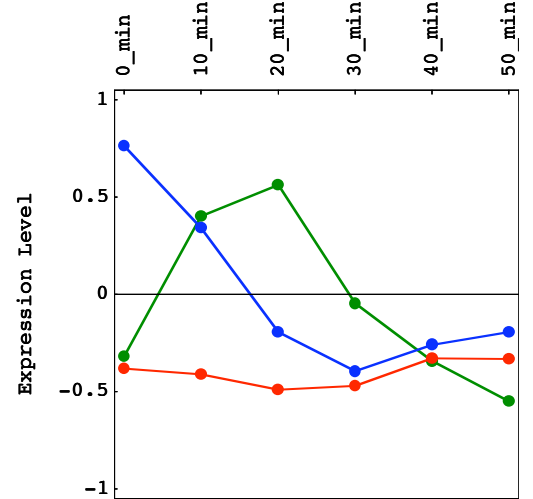

1\_Cdc6-  
0\_min-50\_min

(a) x-Settings

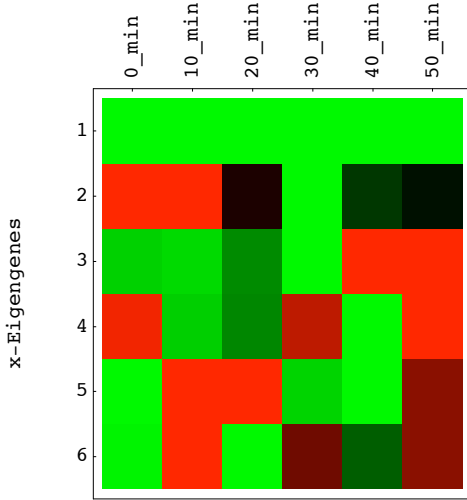

(b) Eigenexpression Fraction  
 $d'_{10} = 0.69$

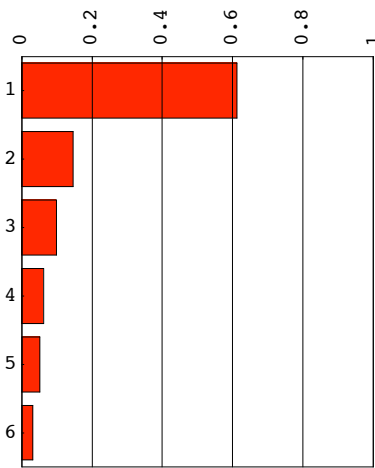

(c) x-Settings

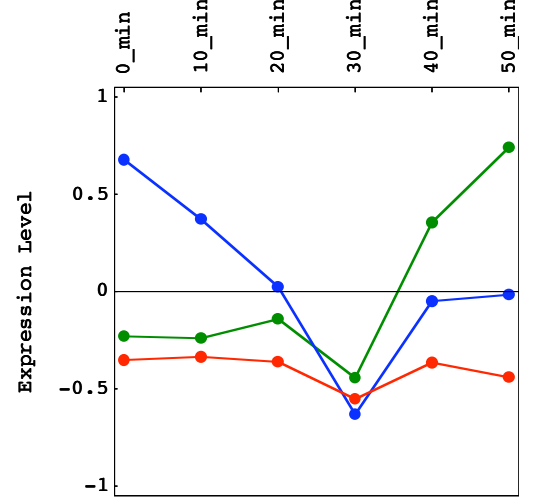

(d) x-Settings

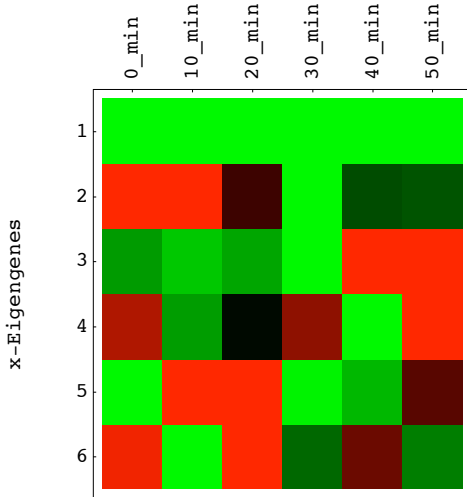

(e) Eigenexpression Fraction  
 $d'_{10} = 0.7$

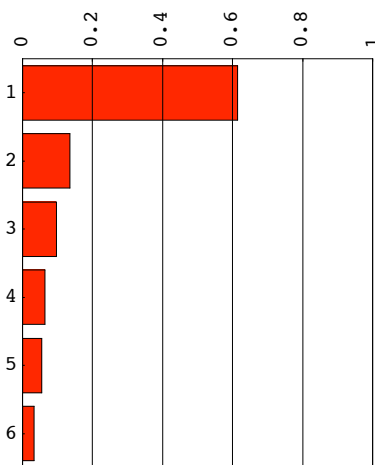

(f) x-Settings

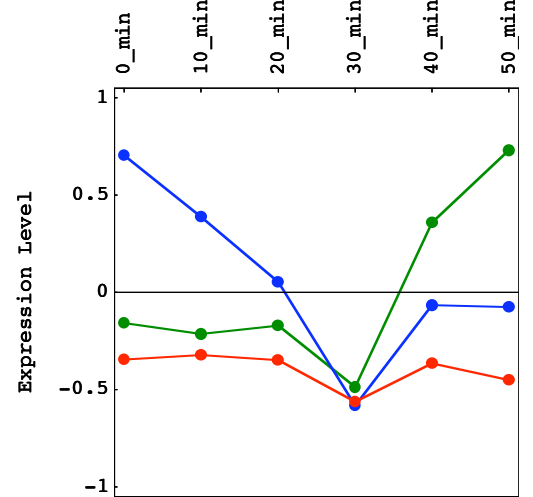

2\_Cdc6+  
0\_min-50\_min

(a) x-Settings

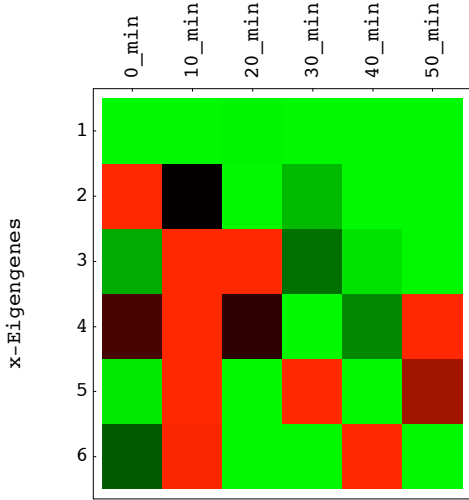

(b) Eigenexpression Fraction  
 $d'_{11} = 0.47$

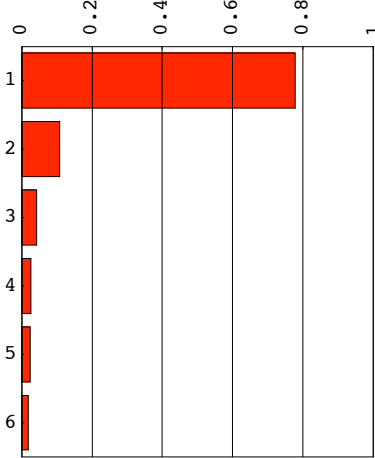

(c) x-Settings

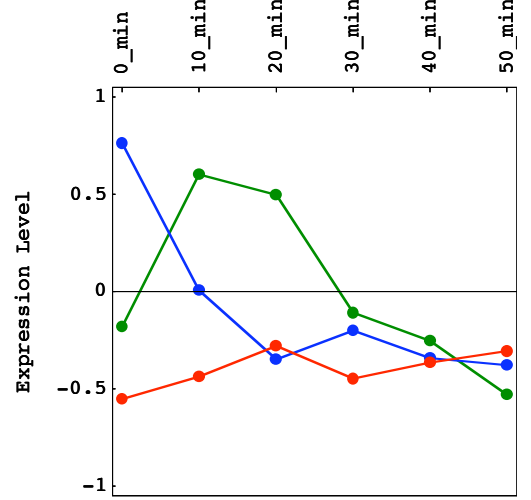

(d) x-Settings

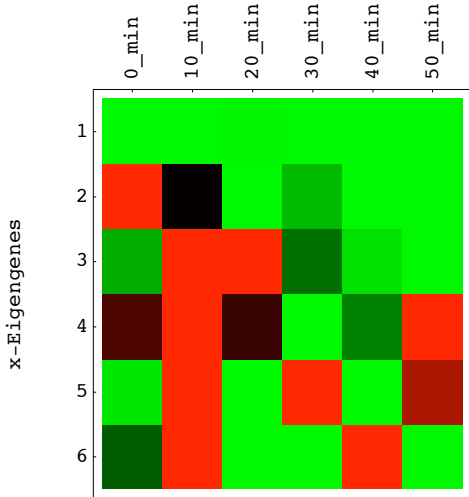

(e) Eigenexpression Fraction  
 $d_{11} = 0.47$

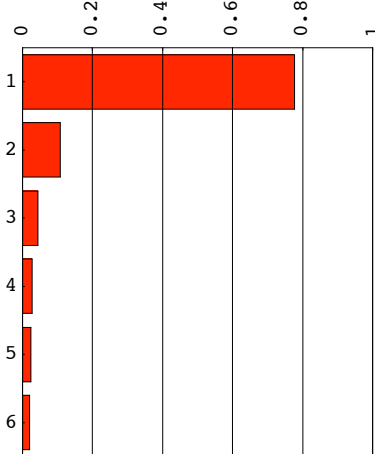

(f) x-Settings

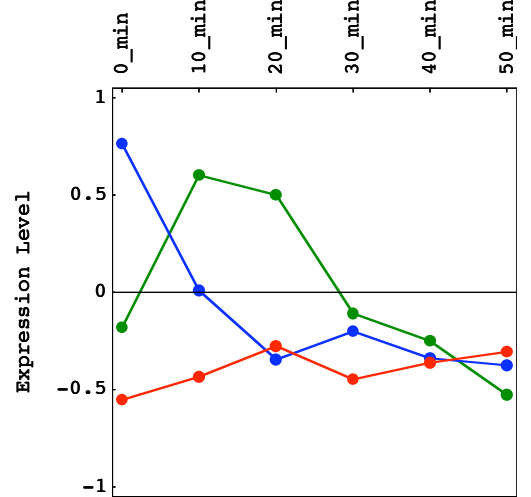



2\_Cdc6-  
0\_min-50\_min

(a) x-Settings

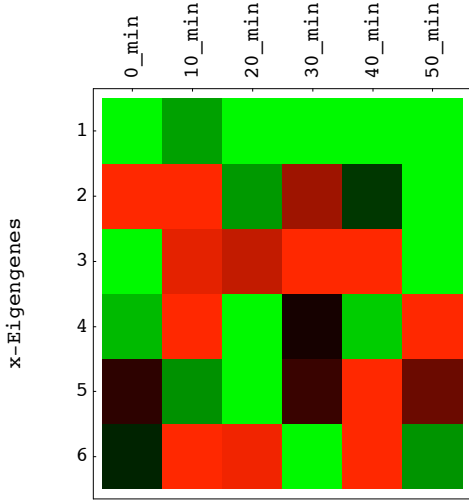

(b) Eigenexpression Fraction  
 $d'_{12} = 0.32$

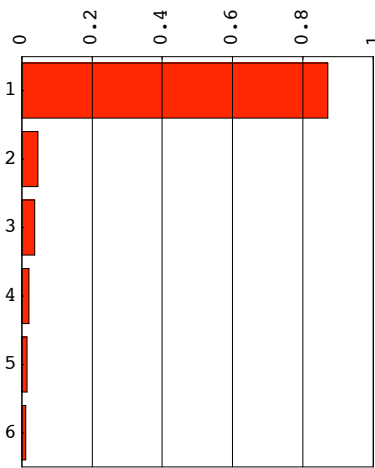

(c) x-Settings

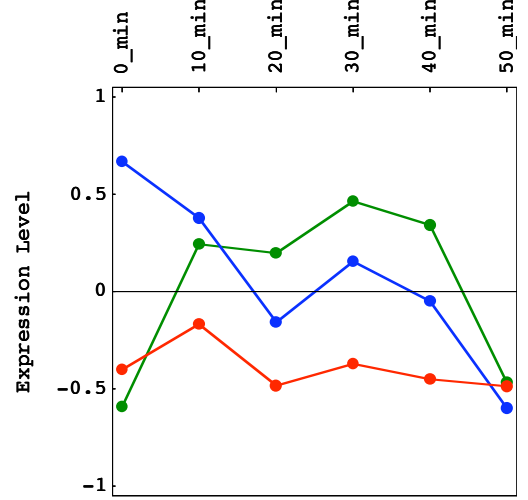

(d) x-Settings

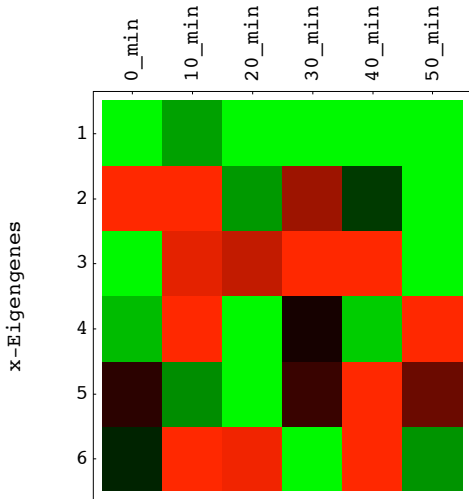

(e) Eigenexpression Fraction  
 $d_{12} = 0.32$

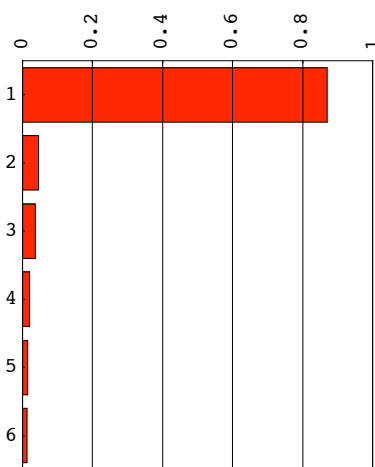

(f) x-Settings

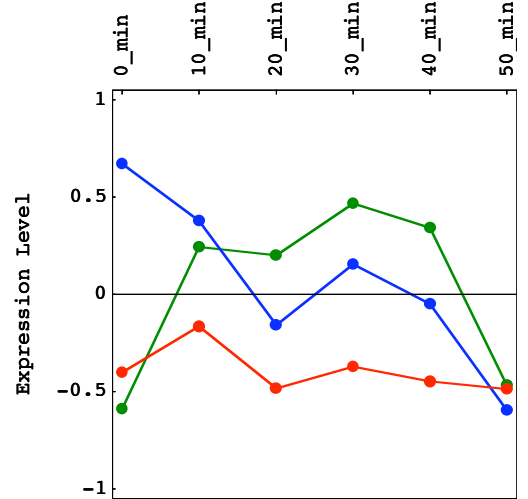

3\_Cdc45+  
0\_min-60\_min

(a) x-Settings

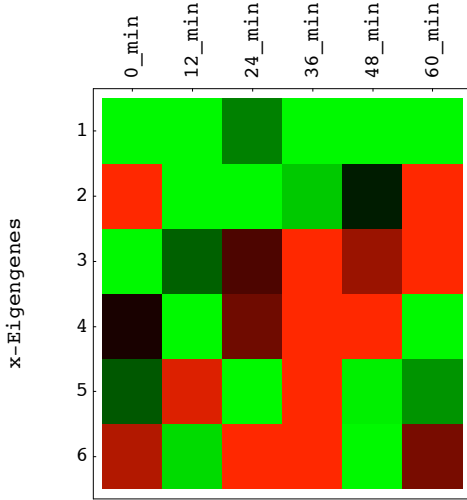

(b) Eigenexpression Fraction  
 $d_{13}' = 0.47$

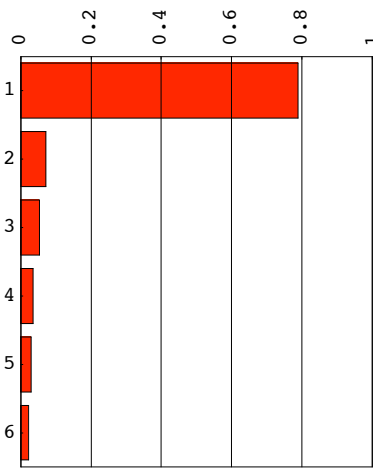

(c) x-Settings

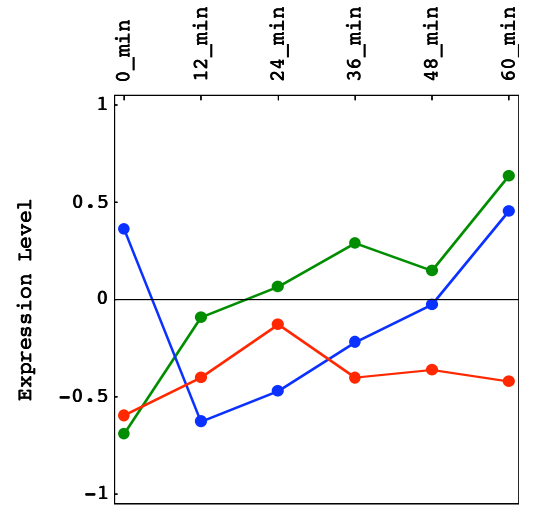

(d) x-Settings

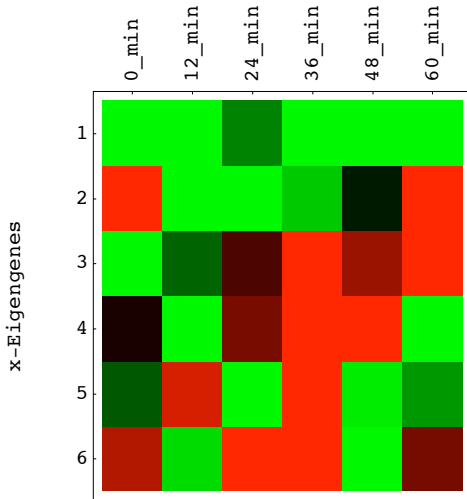

(e) Eigenexpression Fraction  
 $d_{13} = 0.47$

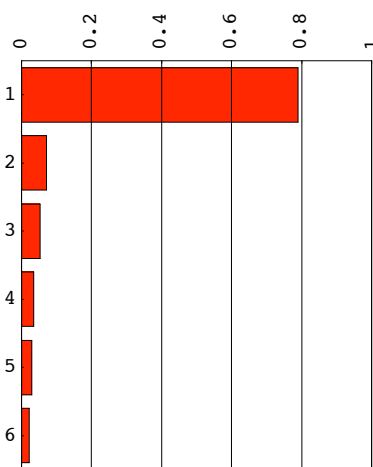

(f) x-Settings

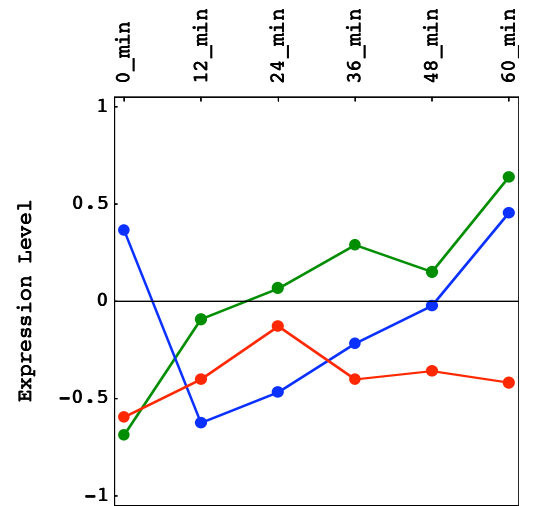

3\_Cdc45-  
0\_min-60\_min

(a) x-Settings

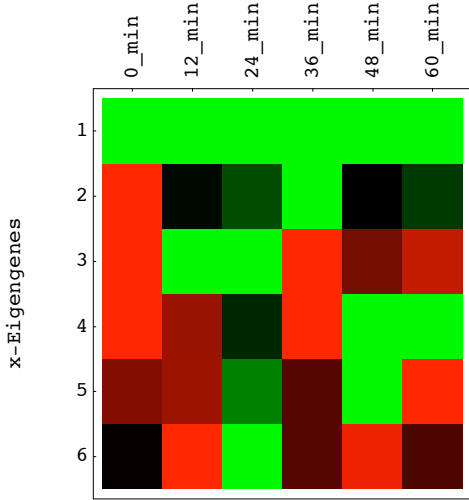

(b) Eigenexpression Fraction  
 $d'_{14} = 0.66$

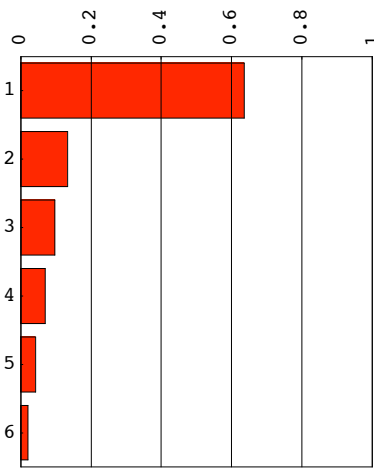

(c) x-Settings

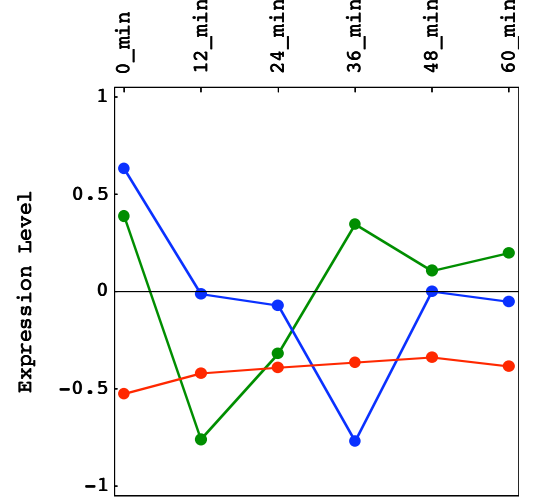

(d) x-Settings

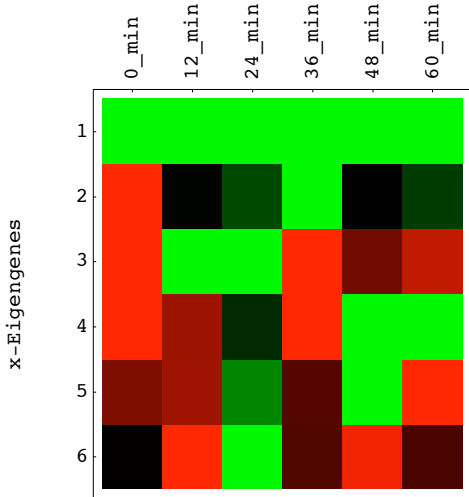

(e) Eigenexpression Fraction  
 $d'_{14} = 0.66$

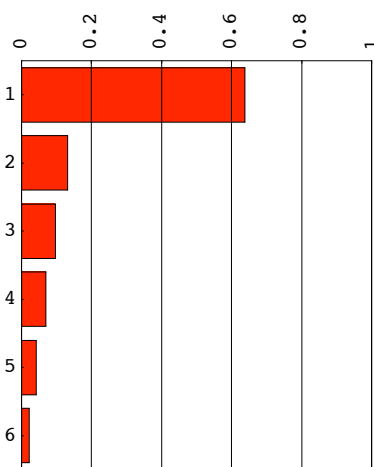

(f) x-Settings

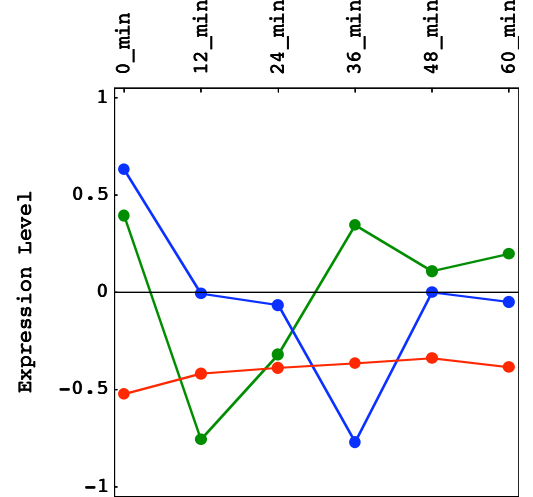

4\_Cdc45+  
0\_min-60\_min

(a) x-Settings

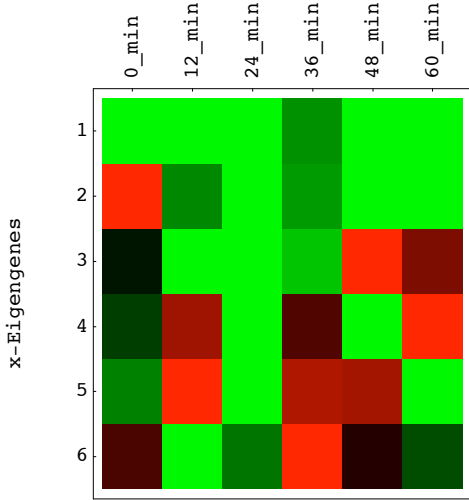

(b) Eigenexpression Fraction  
 $d_{15}' = 0.41$

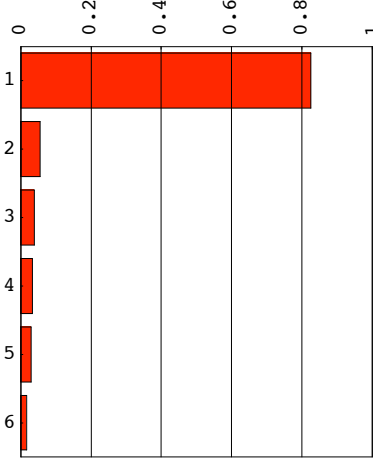

(c) x-Settings

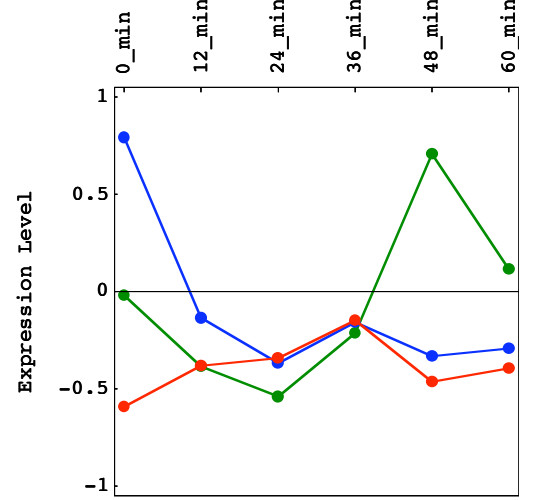

(d) x-Settings

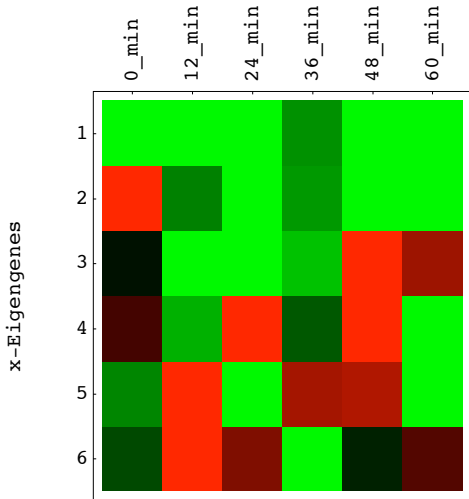

(e) Eigenexpression Fraction  
 $d_{15}' = 0.41$

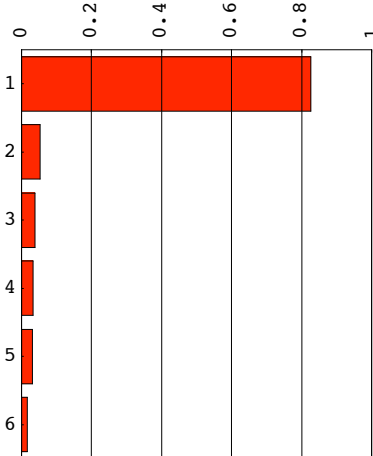

(f) x-Settings

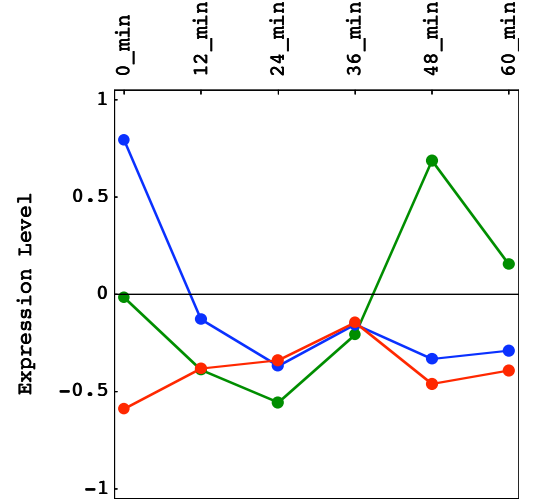

4\_Cdc45-  
0\_min-60\_min

(a) x-Settings

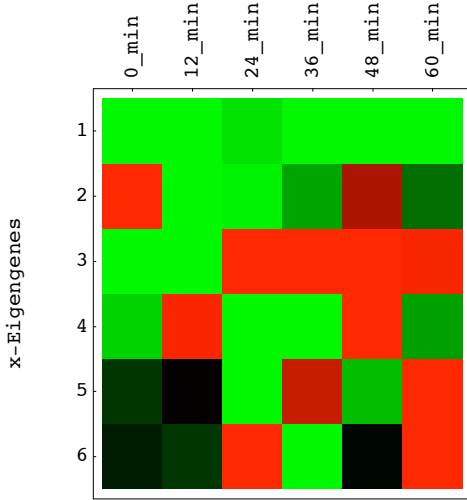

(b) Eigenexpression Fraction  
 $d'_{16} = 0.42$

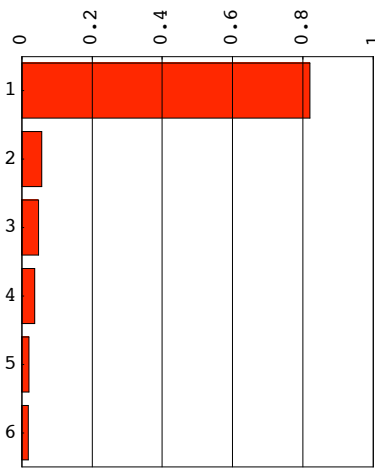

(c) x-Settings

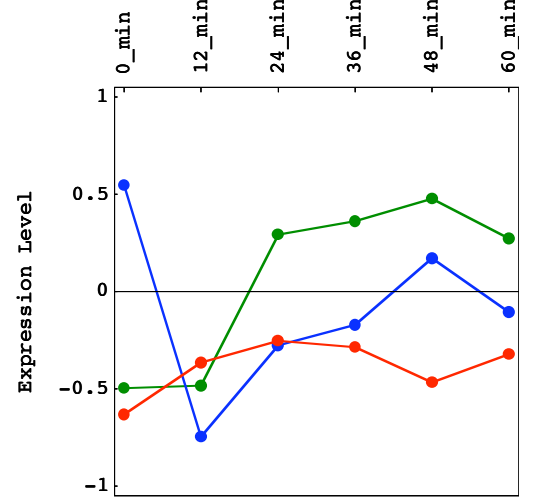

(d) x-Settings

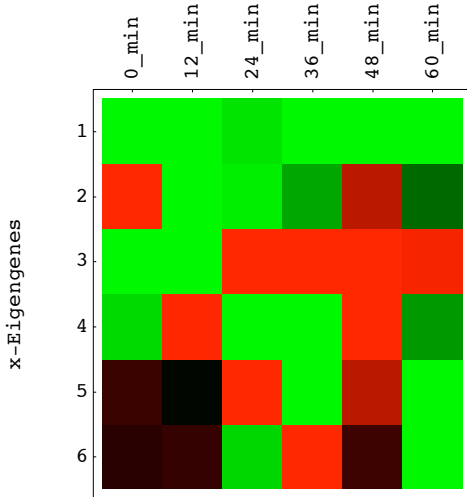

(e) Eigenexpression Fraction  
 $d'_{16} = 0.42$

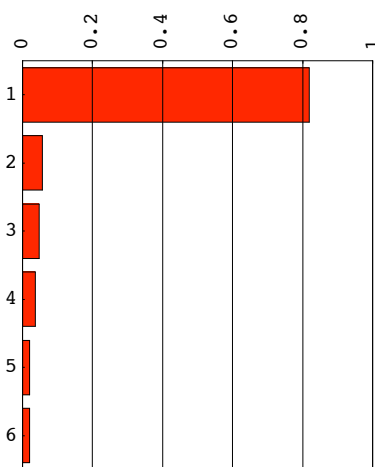

(f) x-Settings

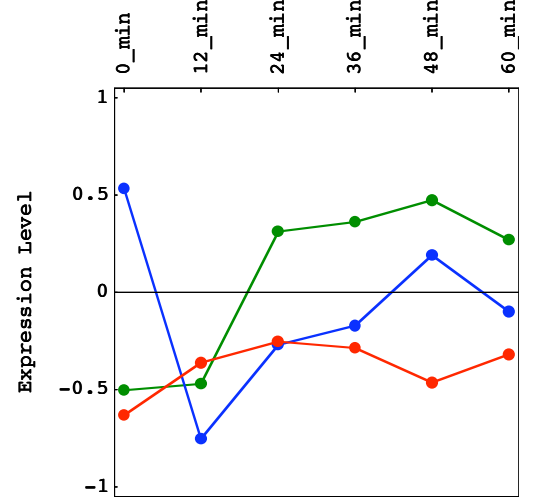

```
(* Structure the Data Tensor *)
```

```
(* Combine Data from Two Different Hybridization Batches of Each Time Course *)
```

```
tensor = {  
  AppendRows[tensor[[1]], tensor[[9]]],  
  AppendRows[tensor[[2]], tensor[[10]]],  
  AppendRows[tensor[[3]], tensor[[11]]],  
  AppendRows[tensor[[4]], tensor[[12]]],  
  AppendRows[tensor[[5]], tensor[[13]]],  
  AppendRows[tensor[[6]], tensor[[14]]],  
  AppendRows[tensor[[7]], tensor[[15]]],  
  AppendRows[tensor[[8]], tensor[[16]]]};  
{yarrays, zgenes, xarrays} = Dimensions[tensor]  
tensornames = {  
  AppendRows[tensornames[[1]], tensornames[[9]]],  
  AppendRows[tensornames[[2]], tensornames[[10]]],  
  AppendRows[tensornames[[3]], tensornames[[11]]],  
  AppendRows[tensornames[[4]], tensornames[[12]]],  
  AppendRows[tensornames[[5]], tensornames[[13]]],  
  AppendRows[tensornames[[6]], tensornames[[14]]],  
  AppendRows[tensornames[[7]], tensornames[[15]]],  
  AppendRows[tensornames[[8]], tensornames[[16]]]};  
{8, 4270, 12}
```

```
(* Convert Data from Log2[Red/Green] to Log2[Signal/Reference] *)
```

```
tensor[[3]] = -tensor[[3]];  
tensor[[4]] = -tensor[[4]];  
tensor[[7]] = -tensor[[7]];  
tensor[[8]] = -tensor[[8]];
```

```
(* Normalize Each Array to Zero Average and Unit Variance *)
```

```
product1 = 1;  
tensor = Transpose[tensor, {1, 3, 2}];  
Do[{  
  tensor[[a, b]] = tensor[[a, b]] - Sum[tensor[[a, b, c]], {c, 1, zgenes}] / zgenes,  
  product1 = product1 * Sqrt[Dot[tensor[[a, b]], tensor[[a, b]]]],  
  tensor[[a, b]] = tensor[[a, b]] / Sqrt[Dot[tensor[[a, b]], tensor[[a, b]]]]  
}, {a, 1, yarrays}, {b, 1, xarrays}]  
tensor = Transpose[tensor, {1, 3, 2}];  
product1 = product1^(1 / xarrays / yarrays)
```

```
57.3395
```

```
(* Detect Experimental Artifacts by Using HOSVD *)
```

```
(* Compute HOSVD x-Eigenvalues *)
```

```
mode2 = Flatten[tensor, 1];  
xarraynames = {2, 4, 6, 8, 10, 12, 1, 3, 5, 7, 9, 11};  
{eigenarrays, eigenexpressions, xeigenvalues} = SingularValues[mode2];  
eigenarrays = Transpose[eigenarrays];  
fractions = eigenexpressions^2 / Sum[eigenexpressions[[a]]^2, {a, 1, xarrays}];  
entropy = -N[Sum[fractions[[a]] * Log[fractions[[a]]], {a, 1, xarrays}] / Log[xarrays];  
entropy = N[Round[100 * entropy] / 100]
```

0.73

```
(* Create Fractions Bar Chart Display *)
```

```
fractions[[1]]
```

0.492475

```
gridx = Table[a, {a, 0, 0.5, 0.1}];  
framex = Table[{gridx[[a]], gridx[[a]]}, {a, 1, 6}];  
gridx = Table[{gridx[[a]], RGBColor[0, 0, 0]}, {a, 1, 6}];  
framey = Table[{a + 1, xarrays - a}, {a, 0, xarrays - 1}];  
labelx = ColumnForm[  
  {"(b) Eigenexpression Fraction", StringJoin["dx = ", ToString[entropy]], " "},  
  Center];  
g = BarChart[  
  Table[fractions[[xarrays - a]], {a, 0, xarrays - 1}],  
  BarOrientation -> Horizontal,  
  PlotRange -> {{0, 0.5 * 1.0001}, {0.5, xarrays + 0.5}},  
  AspectRatio -> 1,  
  Axes -> False,  
  Frame -> True,  
  FrameTicks -> {None, framey, framex, None},  
  FrameLabel -> {None, None, labelx, None},  
  GridLines -> {gridx, None},  
  DisplayFunction -> Identity];  
g = FullGraphics[g];  
g[[1, 2]] = g[[1, 2]] /.  
  Text[labelx, {b_, c_}, {0., -1.}] ->  
  Text[labelx, {b, c + 0.9}, {0, -1}, {1, 0}];  
g[[1, 2]] = g[[1, 2]] /.  
  Text[a_, {b_, c_}, {0., -1.}] ->  
  Text[a, {b, c}, {0, -1}, {0, 1}];  
g2 = Show[g],  
  AspectRatio -> 1.35,  
  PlotRange -> All,  
  DisplayFunction -> Identity];
```

```
(* Create x-Eigenvalues 2D Red & Green Raster Display *)
```

```
arrows[x1_, x2_, x3_, y_, h_] :=  
  Graphics[{  
    Arrow[{x1, y}, {x2, y}, HeadCenter -> 0.5, HeadLength -> length, HeadWidth -> 0.75],  
    Arrow[{x2, y}, {x1, y}, HeadCenter -> 0.5, HeadLength -> length, HeadWidth -> 0.75],  
    Arrow[{x2, y}, {x3, y}, HeadCenter -> 0.5, HeadLength -> length, HeadWidth -> 0.75],  
    Arrow[{x3, y}, {x2, y}, HeadCenter -> 0.5, HeadLength -> length, HeadWidth -> 0.75],  
    Line[{{x1, y - h}, {x1, y + h}}],  
    Line[{{x2, y - h}, {x2, y + h}}],  
    Line[{{x3, y - h}, {x3, y + h}}]};
```

```

length = 0.035;
contrast = 3.6;
displaying = Table[
  If[contrast * xeigengenes[[i, j]] > 0,
    If[contrast * xeigengenes[[i, j]] < 1, {contrast * xeigengenes[[i, j]], 0}, {1, 0}],
    If[contrast * xeigengenes[[i, j]] > -1, {0, -contrast * xeigengenes[[i, j]]}, {0, 1}]],
  {i, 1, xarrays}, {j, 1, xarrays}];
framex = Table[{a - 0.5, xarraynames[a]}], {a, 1, xarrays}];
framey = Table[{a + 1 - 0.5, xarrays - a}, {a, 0, xarrays - 1}];
labely = "x-Eigengenes";
labelx = ColumnForm[{"(a) x-Settings", " ", " "}, Center];
g = Show[
  Graphics[
    RasterArray[
      Table[
        RGBColor[displaying[[i, j, 1]], displaying[[i, j, 2]], 0],
        {i, xarrays, 1, -1}, {j, 1, xarrays}]]],
  AspectRatio -> 1,
  Frame -> True,
  FrameTicks -> {None, framey, framex, None},
  FrameLabel -> {None, labely, labelx, None},
  GridLines -> {{6, {RGBColor[1, 1, 1], Thickness[0.0066]}}}, None},
  DisplayFunction -> Identity];
g = FullGraphics[g];
g[[1, 2]] = g[[1, 2]] /.
  Text[labely, {b_, c_}, {1., 0.}] ->
  Text[labely, {b - 1.5, c}, {0, 0}, {0, 1}];
g[[1, 2]] = g[[1, 2]] /.
  Text[labelx, {b_, c_}, {0., -1.}] ->
  Text[labelx, {b, c + 0.9}, {0, -1}, {1, 0}];
g[[1, 2]] = g[[1, 2]] /.
  Text[a_, {b_, c_}, {0., -1.}] ->
  Text[a, {b, c}, {0, -1}, {0, 1}];
g1 = Show[{g, arrows[0, 6, 12, 14, 0.5]},
  AspectRatio -> 1.05,
  PlotRange -> All,
  DisplayFunction -> Identity];

```

(\* Create Selected x-Eigengenes Graph Display \*)

```

cycle[x_, y_, z_] := {
  Graphics[{RGBColor[1, 1, 0], Rectangle[{x - 0.25, y}, {x + 0.5, z}]}],
  Graphics[{RGBColor[0, 0.5, 0], Rectangle[{x + 0.5, y}, {x + 2.5, z}]}],
  Graphics[{RGBColor[0, 0, 1], Rectangle[{x + 2.5, y}, {x + 3.5, z}]}],
  Graphics[{RGBColor[1, 0, 0], Rectangle[{x + 3.5, y}, {x + 4.5, z}]}],
  Graphics[{RGBColor[1, 0.5, 0], Rectangle[{x + 4.5, y}, {x + 5.5, z}]}],
  Graphics[{RGBColor[1, 1, 0], Rectangle[{x + 5.5, y}, {x + 6.5, z}]}],
  Graphics[{RGBColor[0, 0.5, 0], Rectangle[{x + 6.5, y}, {x + 8.5, z}]}],
  Graphics[{RGBColor[0, 0, 1], Rectangle[{x + 8.5, y}, {x + 10.5, z}]}],
  Graphics[{RGBColor[1, 0, 0], Rectangle[{x + 10.5, y}, {x + 11.25, z}]}]};

p = Table[0, {n, 1, 4}];
color = {RGBColor[1, 0, 0], RGBColor[0, 0, 1], RGBColor[0, 0.5, 0], RGBColor[1, 0.5, 0]};
labelx = ColumnForm[{"(c) x-Settings"}, Center];
labely = ColumnForm[{" ", "Expression Level"}, Center];
framex = Table[{a - 1, xarraynames[a]}], {a, 1, xarrays}];
framey = {-0.5, 0, 0.5};

```



```

Do[{
  coordinates = Table[{a - 1, xeigengenes[[n, a]]}, {a, 1, xarrays}],
  points = Table[Point[coordinates[[a]]], {a, 1, xarrays}],
  line = Line[coordinates],
  g = Show[
    {Graphics[{color[[n]], PointSize[0.022], points}],
    Graphics[{color[[n]], Thickness[0.0044], line}]},
    Frame -> True,
    FrameLabel -> {None, labely, labelx, None},
    FrameTicks -> {None, framey, framex, None},
    PlotRange -> {-0.75, 0.75},
    GridLines -> {{{5.5, RGBColor[0, 0, 0]}}, {{0, RGBColor[0, 0, 0]}}},
    DisplayFunction -> Identity],
  g = FullGraphics[g],
  g[[1, 2]] = g[[1, 2]] /.
    Text[labely, {b_, c_}, {1., 0.}] ->
    Text[labely, {b - 2, c}, {0, 0}, {0, 1}],
  g[[1, 2]] = g[[1, 2]] /.
    Text[labelx, {b_, c_}, {0., -1.}] ->
    Text[labelx, {b, c + 0.28}, {0, -1}, {1, 0}],
  g[[1, 2]] = g[[1, 2]] /.
    Text[a_, {b_, c_}, {0., -1.}] ->
    Text[a, {b, c}, {0, -1}, {0, 1}],
  p[[n]] = Show[g,
    AspectRatio -> 1.05,
    PlotRange -> All,
    DisplayFunction -> Identity]],
{n, 1, 4}]
g3 = Show[{
  cycle[0, 0.64, 0.74],
  arrows[-0.25, 5.5, 11.25, 0.95, 0.05],
  p[[4]], p[[3]], p[[2]], p[[1]]},
  AspectRatio -> 1.05,
  PlotRange -> All,
  DisplayFunction -> Identity];

```

(\* Display x-Eigengenes, Fractions and Selected x-Eigengenes \*)

```

Show[GraphicsArray[{g1, g2, g3}],
  GraphicsSpacing -> -0.16];

```

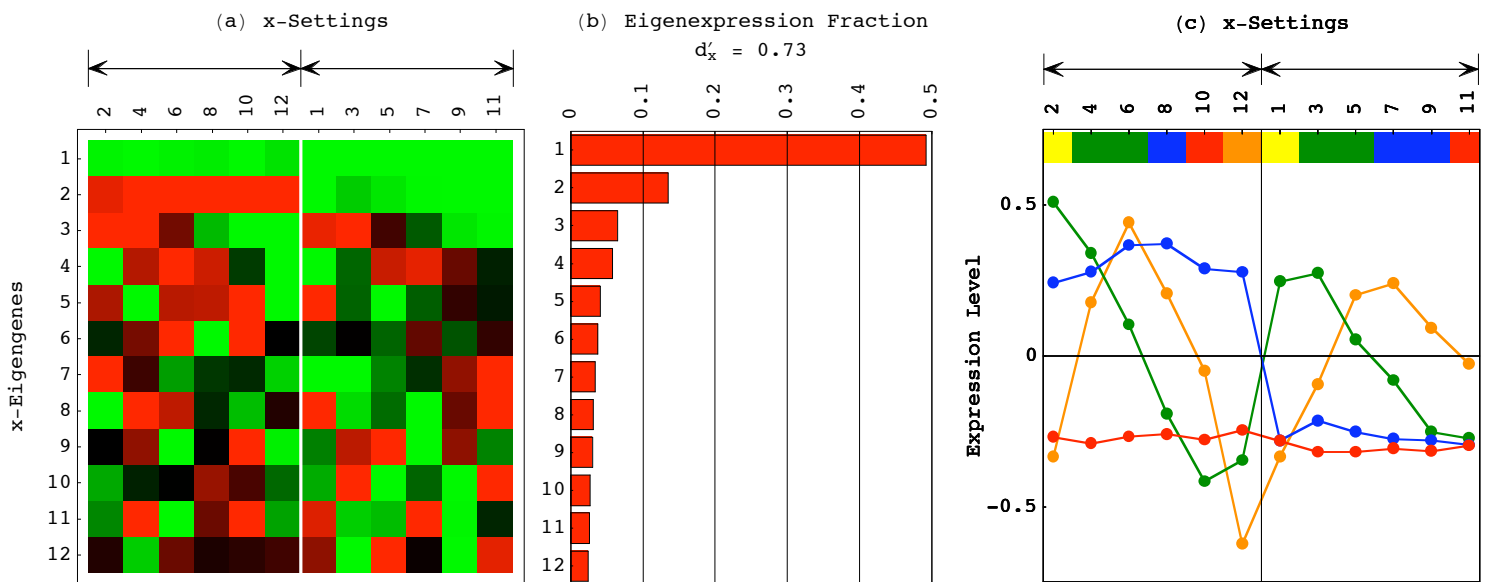

```
(* Compute HOSVD y-Eigenvalues *)
```

```
mode3 = Flatten[Transpose[tensor, {3, 1, 2}], 1];
yarraynames = Flatten[Transpose[tensornames, {3, 1, 2}], 1][[xarrays + 1]];
{eigenarrays, eigenexpressions, yeigenvalues} = SingularValues[mode3];
yeigenvalues[[1]] = -yeigenvalues[[1]];
eigenarrays[[1]] = -eigenarrays[[1]];
yeigenvalues[[2]] = -yeigenvalues[[2]];
eigenarrays[[2]] = -eigenarrays[[2]];
eigenarrays = Transpose[eigenarrays];
fractions = eigenexpressions^2 / Sum[eigenexpressions[[a]]^2, {a, 1, yarrays}];
entropy = -N[Sum[fractions[[a]] * Log[fractions[[a]]], {a, 1, yarrays}] / Log[yarrays];
entropy = N[Round[100 * entropy] / 100]
```

0.89

```
(* Create Fractions Bar Chart Display *)
```

```
fractions[[1]]
```

0.289817

```
gridx = Table[a, {a, 0, 0.3, 0.06}];
framex = Table[{gridx[[a]], gridx[[a]]}, {a, 1, 6}];
gridx = Table[{gridx[[a]], RGBColor[0, 0, 0]}, {a, 1, 6}];
framey = Table[{a + 1, yarrays - a}, {a, 0, yarrays - 1}];
labelx = ColumnForm[
  {"(b) Eigenexpression Fraction", StringJoin["d" = ", ToString[entropy], " "],
  Center];
g = BarChart[
  Table[fractions[[yarrays - a]], {a, 0, yarrays - 1}],
  BarOrientation -> Horizontal,
  PlotRange -> {{0, 0.3 * 1.0001}, {0.5, yarrays + 0.5}},
  AspectRatio -> 1,
  Axes -> False,
  Frame -> True,
  FrameTicks -> {None, framey, framex, None},
  FrameLabel -> {None, None, labelx, None},
  GridLines -> {gridx, None},
  DisplayFunction -> Identity];
g = FullGraphics[g];
g[[1, 2]] = g[[1, 2]] /.
  Text[labelx, {b_, c_}, {0., -1.}] ->
  Text[labelx, {b, c + 1.5}, {0, -1}, {1, 0}];
g[[1, 2]] = g[[1, 2]] /.
  Text[a_, {b_, c_}, {0., -1.}] ->
  Text[a, {b, c}, {0, -1}, {0, 1}];
g2 = Show[g,
  AspectRatio -> 1.35,
  PlotRange -> All,
  DisplayFunction -> Identity];
```

```
(* Create y-Eigenenes 2D Red & Green Raster Display *)
```

```
contrast = 2.4;
displaying = Table[
  If[contrast * yeigenenes[[i, j]] > 0,
    If[contrast * yeigenenes[[i, j]] < 1, {contrast * yeigenenes[[i, j]], 0}, {1, 0}],
    If[contrast * yeigenenes[[i, j]] > -1, {0, -contrast * yeigenenes[[i, j]]}, {0, 1}]],
  {i, 1, yarrays}, {j, 1, yarrays}];
framex = Table[{a - 0.5, yarraynames[[a]]}, {a, 1, yarrays}];
framey = Table[{a + 1 - 0.5, yarrays - a}, {a, 0, yarrays - 1}];
labely = "y-Eigenenes";
labelx = ColumnForm[{"(a) y-Settings", " ", " "}, Center];

g = Show[
  Graphics[
    RasterArray[
      Table[
        RGBColor[displaying[[i, j, 1]], displaying[[i, j, 2]], 0],
        {i, yarrays, 1, -1}, {j, 1, yarrays}]]],
  AspectRatio -> 1,
  Frame -> True,
  FrameTicks -> {None, framey, framex, None},
  FrameLabel -> {None, labely, labelx, None},
  DisplayFunction -> Identity];
g = FullGraphics[g];
g[[1, 2]] = g[[1, 2]] /.
  Text[labely, {b_, c_}, {1., 0.}] ->
  Text[labely, {b - 1.25, c}, {0, 0}, {0, 1}];
g[[1, 2]] = g[[1, 2]] /.
  Text[labelx, {b_, c_}, {0., -1.}] ->
  Text[labelx, {b, c + 1.6}, {0, -1}, {1, 0}];
g[[1, 2]] = g[[1, 2]] /.
  Text[a_, {b_, c_}, {0., -1.}] ->
  Text[a, {b, c}, {0, -1}, {0, 1}];
g1 = Show[g,
  AspectRatio -> 1.05,
  PlotRange -> All,
  DisplayFunction -> Identity];
```

(\* Create y-Eigengenes Graph Display \*)

```

p = Table[0, {n, 1, 4}];
color = {RGBColor[1, 0, 0], RGBColor[0, 0, 1], RGBColor[0, 0.5, 0], RGBColor[1, 0.5, 0]};
labelx = ColumnForm[{"(c) y-Settings", Center];
labely = ColumnForm[{"", "Expression Level", Center];
framex = Table[{a - 1, Yarraynames[[a]]}, {a, 1, Yarrays}];
framey = {-0.5, 0, 0.5};
Do[{
  coordinates = Table[{a - 1, yeigengenes[[n, a]]}, {a, 1, Yarrays}],
  points = Table[Point[coordinates[[a]], {a, 1, Yarrays}],
  line = Line[coordinates],
  g = Show[
    {Graphics[{color[[n]], PointSize[0.022], points}],
    Graphics[{color[[n]], Thickness[0.0044], line}]},
    Frame -> True,
    FrameLabel -> {None, labely, labelx, None},
    GridLines -> {None, {{0, RGBColor[0, 0, 0]}}},
    FrameTicks -> {None, framey, framex, None},
    PlotRange -> {-0.75, 0.75},
    DisplayFunction -> Identity],
  g = FullGraphics[g],
  g[[1, 2]] = g[[1, 2]] /.
    Text[labely, {b_, c_}, {1., 0.}] ->
    Text[labely, {b - 1.6, c}, {0, 0}, {0, 1}],
  g[[1, 2]] = g[[1, 2]] /.
    Text[labelx, {b_, c_}, {0., -1.}] ->
    Text[labelx, {b, c + 0.5}, {0, -1}, {1, 0}],
  g[[1, 2]] = g[[1, 2]] /.
    Text[a_, {b_, c_}, {0., -1.}] ->
    Text[a, {b, c}, {0, -1.0}, {0, 1}],
  p[[n]] = Show[g,
    AspectRatio -> 1.05,
    PlotRange -> All,
    DisplayFunction -> Identity]],
{n, 1, 4}
g3 = Show[{p[[4]], p[[3]], p[[2]], p[[1]]},
  DisplayFunction -> Identity];

```

(\* Display y-Eigengenes and Fractions \*)

```

Show[GraphicsArray[{g1, g2, g3}],
  GraphicsSpacing -> -0.15];

```

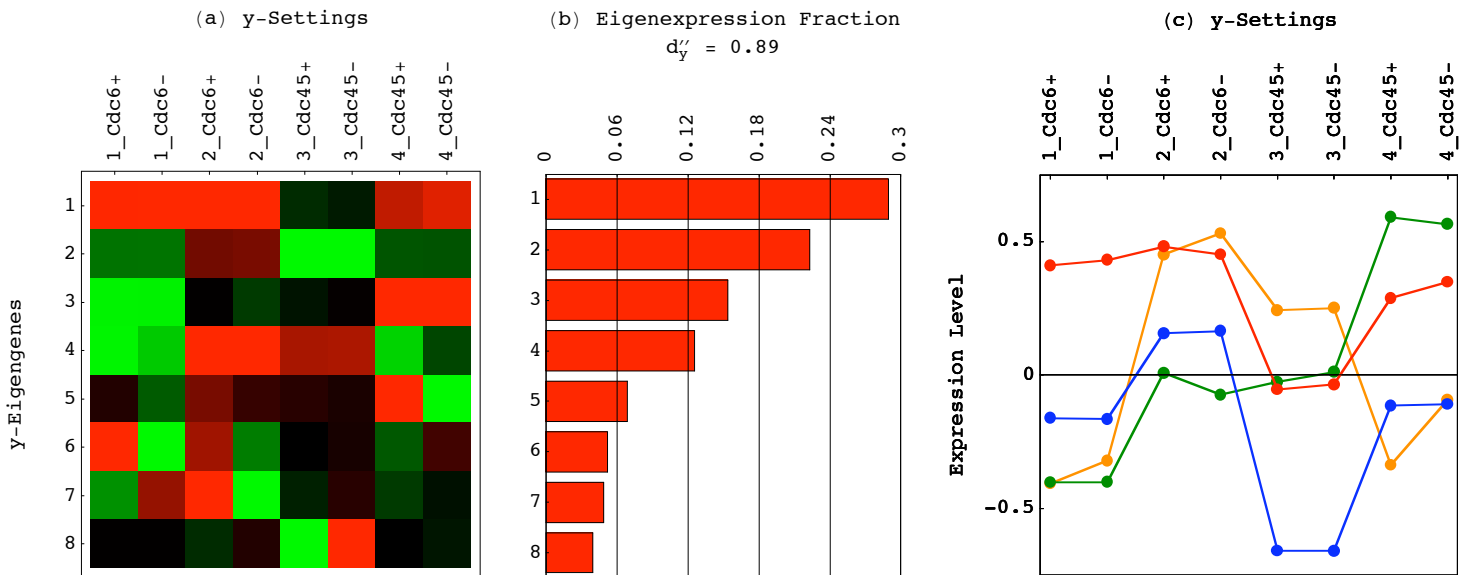

```
(* Rotate y-Eigenenes *)
```

```
pattern = {1, 1, 1, 1, 1, 1, 1, 1};  
x1 = Dot[pattern, yeigenenes[[1]]] / Dot[pattern, yeigenenes[[2]]];  
ArcTan[x1] / Pi
```

```
-0.312755
```

```
pattern = {1, -1, 1, -1, 0, 0, 0, 0};  
x2 = Dot[pattern, yeigenenes[[6]]] / Dot[pattern, yeigenenes[[7]]];  
ArcTan[x2] / Pi
```

```
0.346019
```

```
pattern = {0, 0, 0, 0, 1, -1, 1, -1};  
x3 = Dot[pattern, yeigenenes[[5]]] / Dot[pattern, yeigenenes[[8]]];  
ArcTan[x3] / Pi
```

```
-0.250671
```

```
yeigenenes = {  
  -(x1 * yeigenenes[[1]] + yeigenenes[[2]]) / Sqrt[x1^2 + 1],  
  (x1 * yeigenenes[[2]] - yeigenenes[[1]]) / Sqrt[x1^2 + 1],  
  yeigenenes[[3]],  
  yeigenenes[[4]],  
  -(x3 * yeigenenes[[5]] + yeigenenes[[8]]) / Sqrt[x3^2 + 1],  
  (x2 * yeigenenes[[6]] + yeigenenes[[7]]) / Sqrt[x2^2 + 1],  
  (x2 * yeigenenes[[7]] - yeigenenes[[6]]) / Sqrt[x2^2 + 1],  
  (x3 * yeigenenes[[8]] - yeigenenes[[5]]) / Sqrt[x3^2 + 1];
```

```
(* Approximate Fractions and Entropy *)
```

```
fractions[[1]] = (fractions[[1]] + fractions[[2]]) / 2;  
fractions[[2]] = fractions[[1]];  
fractions[[5]] = Sum[fractions[[a]], {a, 5, 8}] / 4;  
Do[fractions[[a]] = fractions[[5]], {a, 6, 8}];  
entropy = -N[Sum[fractions[[a]] * Log[fractions[[a]]], {a, 1, yarrays}] / Log[yarrays];  
entropy = N[Round[100 * entropy] / 100]
```

```
0.9
```

```
(* Create Approximate Fractions Bar Chart Display *)
```

```
gridx = Table[a, {a, 0, 0.3, 0.06}];  
framex = Table[{gridx[[a]], gridx[[a]]}, {a, 1, 6}];  
gridx = Table[{gridx[[a]], RGBColor[0, 0, 0]}, {a, 1, 6}];  
framey = Table[{a + 1, yarrays - a}, {a, 0, yarrays - 1}];  
labelx = ColumnForm[  
  {"(b) Eigenexpression Fraction", StringJoin["dy = ", ToString[entropy], " "],  
  Center];  
g = BarChart[  
  Table[fractions[[yarrays - a]], {a, 0, yarrays - 1}],  
  BarOrientation -> Horizontal,  
  PlotRange -> {{0, 0.3 * 1.0001}, {0.5, yarrays + 0.5}},  
  AspectRatio -> 1,  
  Axes -> False,  
  Frame -> True,  
  FrameTicks -> {None, framey, framex, None},  
  FrameLabel -> {None, None, labelx, None},  
  GridLines -> {gridx, None},  
  DisplayFunction -> Identity];
```

```

g = FullGraphics[g];
g[[1, 2]] = g[[1, 2]] /.
  Text[labelx, {b_, c_}, {0., -1.}] ->
  Text[labelx, {b, c + 1.5}, {0, -1}, {1, 0}];
g[[1, 2]] = g[[1, 2]] /.
  Text[a_, {b_, c_}, {0., -1.}] ->
  Text[a, {b, c}, {0, -1}, {0, 1}];
g2 = Show[g,
  AspectRatio -> 1.35,
  PlotRange -> All,
  DisplayFunction -> Identity];

(* Create Rotated y-Eigengenes 2 D Red & Green Raster Display *)

```

```

contrast = 2.4;
displaying = Table[
  If[contrast * yeigengenes[[i, j]] > 0,
    If[contrast * yeigengenes[[i, j]] < 1, {contrast * yeigengenes[[i, j]], 0}, {1, 0}],
    If[contrast * yeigengenes[[i, j]] > -1, {0, -contrast * yeigengenes[[i, j]]}, {0, 1}]],
  {i, 1, yarrays}, {j, 1, yarrays}];
framex = Table[{a - 0.5, yarraynames[[a]]}, {a, 1, yarrays}];
framey = Table[{a + 1 - 0.5, yarrays - a}, {a, 0, yarrays - 1}];
labely = "y-Eigengenes";
labelx = ColumnForm[{"(a) y-Settings", " ", " "}, Center];
g = Show[
  Graphics[
    RasterArray[
      Table[
        RGBColor[displaying[[i, j, 1]], displaying[[i, j, 2]], 0],
        {i, yarrays, 1, -1}, {j, 1, yarrays}]]],
  AspectRatio -> 1,
  Frame -> True,
  FrameTicks -> {None, framey, framex, None},
  FrameLabel -> {None, labely, labelx, None},
  DisplayFunction -> Identity];
g = FullGraphics[g];
g[[1, 2]] = g[[1, 2]] /.
  Text[labely, {b_, c_}, {1., 0.}] ->
  Text[labely, {b - 1.25, c}, {0, 0}, {0, 1}];
g[[1, 2]] = g[[1, 2]] /.
  Text[labelx, {b_, c_}, {0., -1.}] ->
  Text[labelx, {b, c + 1.6}, {0, -1}, {1, 0}];
g[[1, 2]] = g[[1, 2]] /.
  Text[a_, {b_, c_}, {0., -1.}] ->
  Text[a, {b, c}, {0, -1}, {0, 1}];
g1 = Show[g,
  AspectRatio -> 1.05,
  PlotRange -> All,
  DisplayFunction -> Identity];

```

(\* Create Rotated y-Eigengenes Graph Display \*)

```

p = Table[0, {n, 1, 6}];
color = {RGBColor[1, 0, 0], RGBColor[0, 0, 1], RGBColor[0, 0.5, 0],
  RGBColor[1, 0, 0], RGBColor[0, 0, 1], RGBColor[0, 0.5, 0]};
labelx = ColumnForm[{"(c) y-Settings"}, Center];
labely = ColumnForm[{" ", "Expression Level"}, Center];
framex = Table[{a - 1, yarraynames[[a]]}, {a, 1, yarrays}];
framey = {-0.5, 0, 0.5};

```

```

Do[{
  coordinates = Table[{a - 1, yeigengenes[[n, a]]}, {a, 1, yarrays}],
  points = Table[Point[coordinates[[a]]], {a, 1, yarrays}],
  line = Line[coordinates],
  g = Show[
    {Graphics[{color[[n]], PointSize[0.022], points}],
    Graphics[{color[[n]], Thickness[0.0044], line}]},
  Frame -> True,
  FrameLabel -> {None, labely, labelx, None},
  GridLines -> {None, {{0, RGBColor[0, 0, 0]}}},
  FrameTicks -> {None, framey, framex, None},
  PlotRange -> {-0.75, 0.75},
  DisplayFunction -> Identity],
g = FullGraphics[g],
g[[1, 2]] = g[[1, 2]] /.
  Text[labely, {b_, c_}, {1., 0.}] ->
  Text[labely, {b - 1.6, c}, {0, 0}, {0, 1}],
g[[1, 2]] = g[[1, 2]] /.
  Text[labelx, {b_, c_}, {0., -1.}] ->
  Text[labelx, {b, c + 0.5}, {0, -1}, {1, 0}],
g[[1, 2]] = g[[1, 2]] /.
  Text[a_, {b_, c_}, {0., -1.}] ->
  Text[a, {b, c}, {0, -1.0}, {0, 1}],
p[[n]] = Show[g,
  AspectRatio -> 1.05,
  PlotRange -> All,
  DisplayFunction -> Identity]],
{n, 1, 6}]
g3 = Show[{p[[6]], p[[5]], p[[1]]},
  DisplayFunction -> Identity];

```

(\* Display Rotated y-Eigengenes and Approximate Fractions \*)

```

Show[GraphicsArray[{g1, g2, g3}],
  GraphicsSpacing -> -0.15];

```

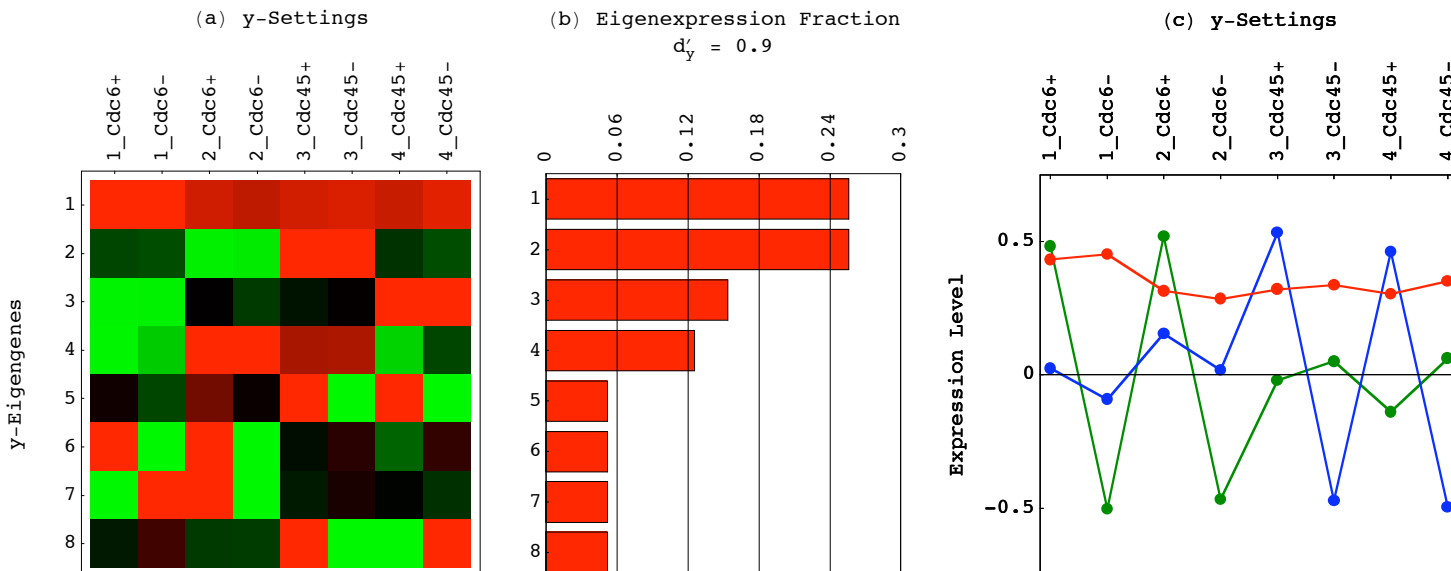

```
(* Rearrange y-Settings *)
```

```
ryeigengenes = AppendRows[  
  TakeColumns[yeigengenes, {1}], TakeColumns[yeigengenes, {3}],  
  TakeColumns[yeigengenes, {2}], TakeColumns[yeigengenes, {4}],  
  TakeColumns[yeigengenes, {5}], TakeColumns[yeigengenes, {7}],  
  TakeColumns[yeigengenes, {6}], TakeColumns[yeigengenes, {8}];  
yarraynames = {yarraynames[[1]], yarraynames[[3]], yarraynames[[2]], yarraynames[[4]],  
  yarraynames[[5]], yarraynames[[7]], yarraynames[[6]], yarraynames[[8]]};
```

```
(* Create Approximate Fractions Bar Chart Display With Rearranged y-Settings *)
```

```
gridx = Table[a, {a, 0, 0.3, 0.06}];  
framex = Table[{gridx[[a]], gridx[[a]]}, {a, 1, 6}];  
gridx = Table[{gridx[[a]], RGBColor[0, 0, 0]}, {a, 1, 6}];  
framey = Table[{a + 1, yarrays - a}, {a, 0, yarrays - 1}];  
labelx = ColumnForm[  
  {"(b) Eigenexpression Fraction", StringJoin["dy = ", ToString[entropy]], " "},  
  Center];  
g = BarChart[  
  Table[fractions[[yarrays - a]], {a, 0, yarrays - 1}],  
  BarOrientation -> Horizontal,  
  PlotRange -> {{0, 0.3 * 1.0001}, {0.5, yarrays + 0.5}},  
  AspectRatio -> 1,  
  Axes -> False,  
  Frame -> True,  
  FrameTicks -> {None, framey, framex, None},  
  FrameLabel -> {None, None, labelx, None},  
  GridLines -> {gridx, None},  
  DisplayFunction -> Identity];  
g = FullGraphics[g];  
g[[1, 2]] = g[[1, 2]] /.  
  Text[labelx, {b_, c_}, {0., -1.}] ->  
  Text[labelx, {b, c + 1.5}, {0, -1}, {1, 0}];  
g[[1, 2]] = g[[1, 2]] /.  
  Text[a_, {b_, c_}, {0., -1.}] ->  
  Text[a, {b, c}, {0, -1}, {0, 1}];  
g2 = Show[g,  
  AspectRatio -> 1.35,  
  PlotRange -> All,  
  DisplayFunction -> Identity];
```



(\* Create Rotated y-Eigengenes 2 D Red & Green Raster Display With Rearranged y-Settings \*)

```
contrast = 2.4;
displaying = Table[
  If[contrast * ryeigengenes[[i, j]] > 0,
    If[contrast * ryeigengenes[[i, j]] < 1, {contrast * ryeigengenes[[i, j]], 0}, {1, 0}],
    If[contrast * ryeigengenes[[i, j]] > -1, {0, -contrast * ryeigengenes[[i, j]]}, {0, 1}]],
  {i, 1, yarrays}, {j, 1, yarrays}];
framex = Table[{a - 0.5, ryarraynames[[a]]}, {a, 1, yarrays}];
framey = Table[{a + 1 - 0.5, yarrays - a}, {a, 0, yarrays - 1}];
labely = "y-Eigengenes";
labelx = ColumnForm[{"(a) y-Settings", " ", " "}, Center];
g = Show[
  Graphics[
    RasterArray[
      Table[
        RGBColor[displaying[[i, j, 1]], displaying[[i, j, 2]], 0],
        {i, yarrays, 1, -1}, {j, 1, yarrays}]]],
  AspectRatio -> 1,
  Frame -> True,
  FrameTicks -> {None, framey, framex, None},
  FrameLabel -> {None, labely, labelx, None},
  DisplayFunction -> Identity];
g = FullGraphics[g];
g[[1, 2]] = g[[1, 2]] /.
  Text[labely, {b_, c_}, {1., 0.}] ->
  Text[labely, {b - 1.25, c}, {0, 0}, {0, 1}];
g[[1, 2]] = g[[1, 2]] /.
  Text[labelx, {b_, c_}, {0., -1.}] ->
  Text[labelx, {b, c + 1.6}, {0, -1}, {1, 0}];
g[[1, 2]] = g[[1, 2]] /.
  Text[a_, {b_, c_}, {0., -1.}] ->
  Text[a, {b, c}, {0, -1}, {0, 1}];
g1 = Show[g,
  AspectRatio -> 1.05,
  PlotRange -> All,
  DisplayFunction -> Identity];
```

(\* Create Rotated y-Eigengenes Graph Display With Rearranged y-Settings \*)

```
p = Table[0, {n, 1, 6}];
color = {RGBColor[1, 0, 0], RGBColor[0, 0, 1], RGBColor[0, 0.5, 0],
  RGBColor[1, 0, 0], RGBColor[0, 0, 1], RGBColor[0, 0.5, 0]};
labelx = ColumnForm[{"(c) y-Settings"}, Center];
labely = ColumnForm[{" ", "Expression Level"}, Center];
framex = Table[{a - 1, ryarraynames[[a]]}, {a, 1, yarrays}];
framey = {-0.5, 0, 0.5};
```

```

Do[{
  coordinates = Table[{a - 1, ryeigengenes[[n, a]]}, {a, 1, yarrays}],
  points = Table[Point[coordinates[[a]]], {a, 1, yarrays}],
  line = Line[coordinates],
  g = Show[
    {Graphics[{color[[n]], PointSize[0.022], points}],
    Graphics[{color[[n]], Thickness[0.0044], line}]},
    Frame -> True,
    FrameLabel -> {None, labely, labelx, None},
    GridLines -> {None, {{0, RGBColor[0, 0, 0]}}},
    FrameTicks -> {None, framey, framex, None},
    PlotRange -> {-0.75, 0.75},
    DisplayFunction -> Identity],
  g = FullGraphics[g],
  g[[1, 2]] = g[[1, 2]] /.
    Text[labely, {b_, c_}, {1., 0.}] ->
    Text[labely, {b - 1.6, c}, {0, 0}, {0, 1}],
  g[[1, 2]] = g[[1, 2]] /.
    Text[labelx, {b_, c_}, {0., -1.}] ->
    Text[labelx, {b, c + 0.5}, {0, -1}, {1, 0}],
  g[[1, 2]] = g[[1, 2]] /.
    Text[a_, {b_, c_}, {0., -1.}] ->
    Text[a, {b, c}, {0, -1.0}, {0, 1}],
  p[[n]] = Show[g,
    AspectRatio -> 1.05,
    PlotRange -> All,
    DisplayFunction -> Identity]],
{n, 1, 6}]
g3 = Show[{p[[6]], p[[5]], p[[1]]},
  DisplayFunction -> Identity];

```

(\* Display Rotated y-Eigengenes and Approximate Fractions With Rearranged y-Settings \*)

```

Show[GraphicsArray[{g1, g2, g3}],
  GraphicsSpacing -> -0.15];

```

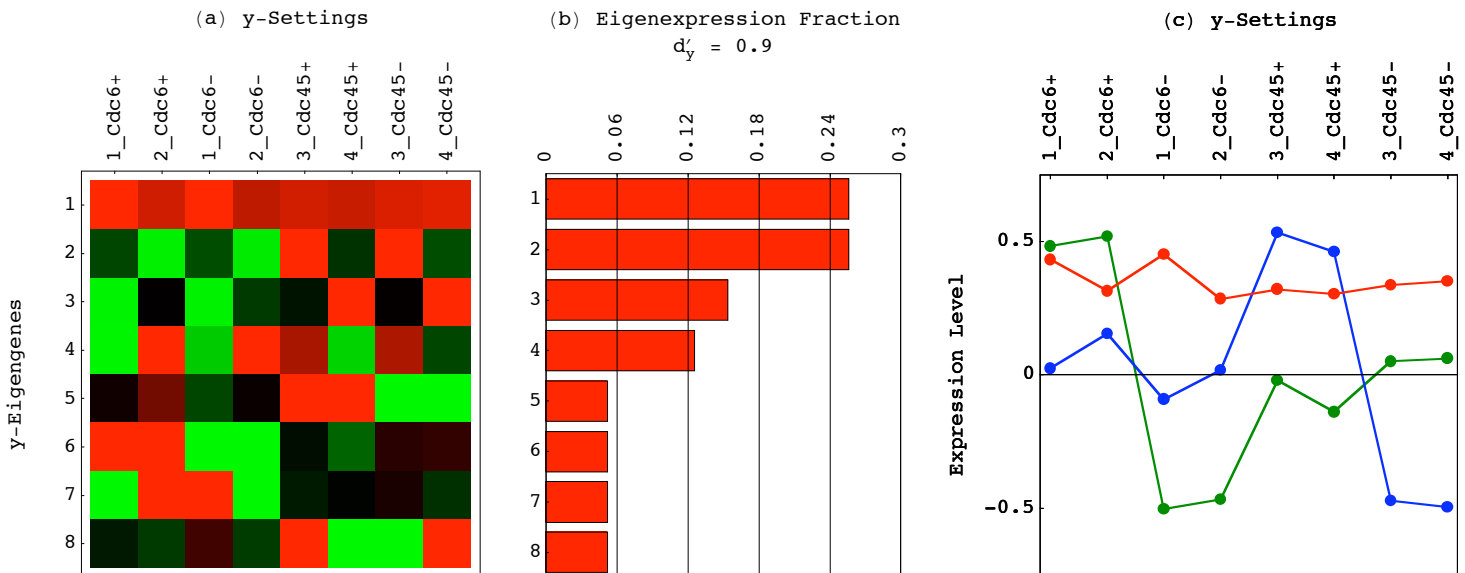

```
(* Reconstruct the Data Tensor in the Subspace of Biological Variation by Using HOSVD *)
```

```
(* Reconstruct the x-Eigengenes and the y-Eigengenes *)
```

```
xeigengenes = Drop[xeigengenes, {5, 12}];  
xeigengenes = Drop[xeigengenes, {2, 2}];
```

```
yeigengenes = Drop[yeigengenes, {7, 8}];  
yeigengenes = Drop[yeigengenes, {2, 4}];
```

```
(* Reconstruct the Core Tensor *)
```

```
core = Transpose[tensor, {3, 1, 2}];  
core = Transpose[core, {2, 3, 1}];  
core = Dot[core, Transpose[xeigengenes]];  
core = Transpose[core, {3, 1, 2}];  
core = Dot[core, Transpose[yeigengenes]];  
core = Transpose[core, {2, 3, 1}];
```

```
(* Reconstruct the Data Tensor *)
```

```
tensor = Transpose[core, {3, 1, 2}];  
tensor = Dot[tensor, yeigengenes];  
tensor = Transpose[tensor, {1, 3, 2}];  
tensor = Dot[tensor, xeigengenes];  
tensor = Transpose[tensor, {2, 1, 3}];  
Dimensions[tensor]
```

```
{8, 4270, 12}
```

```
(* Average Duplicated Time Courses *)
```

```
tensor = {  
  (tensor[[2]] + tensor[[4]]) / 2.,  
  (tensor[[6]] + tensor[[8]]) / 2.,  
  (tensor[[1]] + tensor[[3]] + tensor[[5]] + tensor[[7]]) / 4.};  
{yarrays, zgenes, xarrays} = Dimensions[tensor]  
tensornames =  
  ReplaceAll[ReplaceAll[ReplaceAll[  
    Transpose[Drop[Transpose[  
      {tensornames[[2]],  
        tensornames[[6]],  
        tensornames[[1]]},  
      {2, 1, 3}], {1}], {2, 1, 3}],  
    "1_Cdc6+" -> "Cdc6+/45+"], "3_Cdc45-" -> "Cdc45-", "1_Cdc6-" -> "Cdc6-"];  
tensornames[[3, 2]] = xarraynames;
```

```
{3, 4270, 12}
```

```
(* Normalize Each Array to Zero Average and Unit Variance *)
```

```
product2 = 1;  
tensor = Transpose[tensor, {1, 3, 2}];  
Do[{  
  tensor[[a, b]] = tensor[[a, b]] - Sum[tensor[[a, b, c]], {c, 1, zgenes}] / zgenes,  
  product2 = product2 * Sqrt[Dot[tensor[[a, b]], tensor[[a, b]]],  
  tensor[[a, b]] = tensor[[a, b]] / Sqrt[Dot[tensor[[a, b]], tensor[[a, b]]]  
}, {a, 1, yarrays}, {b, 1, xarrays}]  
tensor = Transpose[tensor, {1, 3, 2}];  
product2 = product2 ^ (1 / xarrays / yarrays)
```

```
0.479619
```

```
(* Associate Time Points with Cell Cycle Phases of Control Time Courses *)
```

```
(* Display Sorted Control Time Courses Data *)
```

```
(* Center, Normalize and Sort Control Time Courses Data *)
```

```
arraypatterns = Transpose[tensor[[3]]];  
dimensions = Dimensions[arraypatterns][[1]]  
  
12  
  
average = Table[1, {a, 1, zgenes}];  
average = N[average / Sqrt[Dot[average, average]]];  
arraypatterns = arraypatterns - N[Outer[Times, Dot[arraypatterns, average], average]];  
Do[arraypatterns[[a]] = arraypatterns[[a]] / Sqrt[Dot[arraypatterns[[a]], arraypatterns[[a]]],  
  {a, 1, dimensions}]  
Do[arraypatterns[[a]] = Sort[arraypatterns[[a]], OrderedQ[{{#2}, {#1}}] &],  
  {a, 1, dimensions}]
```

```
(* Create Sorted Control Time Courses Data Display *)
```

```
p = Table[0, {a, 1, dimensions}];  
color = {RGBColor[0.75, 0, 1], RGBColor[1, 0, 0], RGBColor[1, 0.5, 0],  
  RGBColor[0, 0.5, 0], RGBColor[0, 0, 1]};  
labelx = "Expression Level";  
labely = "Number of Genes";  
framex = Table[{0.05 * a, xarraynames[[a]]}, {a, 1, dimensions}];  
framey = {{-200, " 200"}, {-2000, "2000"}, {-zgenes + 200, "4070"}};  
Do[{coordinates = Table[  
  If[arraypatterns[[n, a]] + 0.05 * n < -0.025, -0.025,  
    If[arraypatterns[[n, a]] + 0.05 * n > 0.675, 0.675,  
      arraypatterns[[n, a]] + 0.05 * n}],  
  {a, 1, zgenes}],  
  coordinates = Table[{coordinates[[a]], -a + 1}, {a, 1, zgenes}],  
  line = Line[coordinates],  
  g = Show[Graphics[{color[[Mod[n, 5] + 1]], line}],  
    Frame -> True,  
    FrameLabel -> {None, labely, labelx, None},  
    FrameTicks -> {None, framey, framex, None},  
    GridLines -> {{{0.05 * n, RGBColor[0, 0, 0]}}, {{-200, RGBColor[0, 0, 0]},  
      {-2000, RGBColor[0, 0, 0]}, {-zgenes + 200, RGBColor[0, 0, 0]}}},  
    PlotRange -> {{-0.025, 0.675}, {200, -zgenes + 1 - 200}},  
    DisplayFunction -> Identity],  
  g = FullGraphics[g],  
  g[[1, 2]] = g[[1, 2]] /.  
    Text[labely, {b_, c_}, {1., 0.}] ->  
    Text[labely, {b - 0.052, c}, {0, 0}, {0, 1}],  
  g[[1, 2]] = g[[1, 2]] /.  
    Text[labelx, {b_, c_}, {0., -1.}] ->  
    Text[labelx, {b, c + 420}, {0, -1}, {1, 0}],  
  g[[1, 2]] = g[[1, 2]] /.  
    Text[a_, {b_, c_}, {0., -1.}] ->  
    Text[a, {b, c}, {0, -1}, {0, 1}],  
  p[[n]] = Show[g,  
    AspectRatio -> 1 / GoldenRatio,  
    PlotRange -> All,  
    DisplayFunction -> Identity]  
}, {n, 1, dimensions}];
```

(\* Display Sorted Control Time Courses Data \*)

```
Show[Table[p[[a]], {a, 1, dimensions}],  
DisplayFunction -> $DisplayFunction];
```

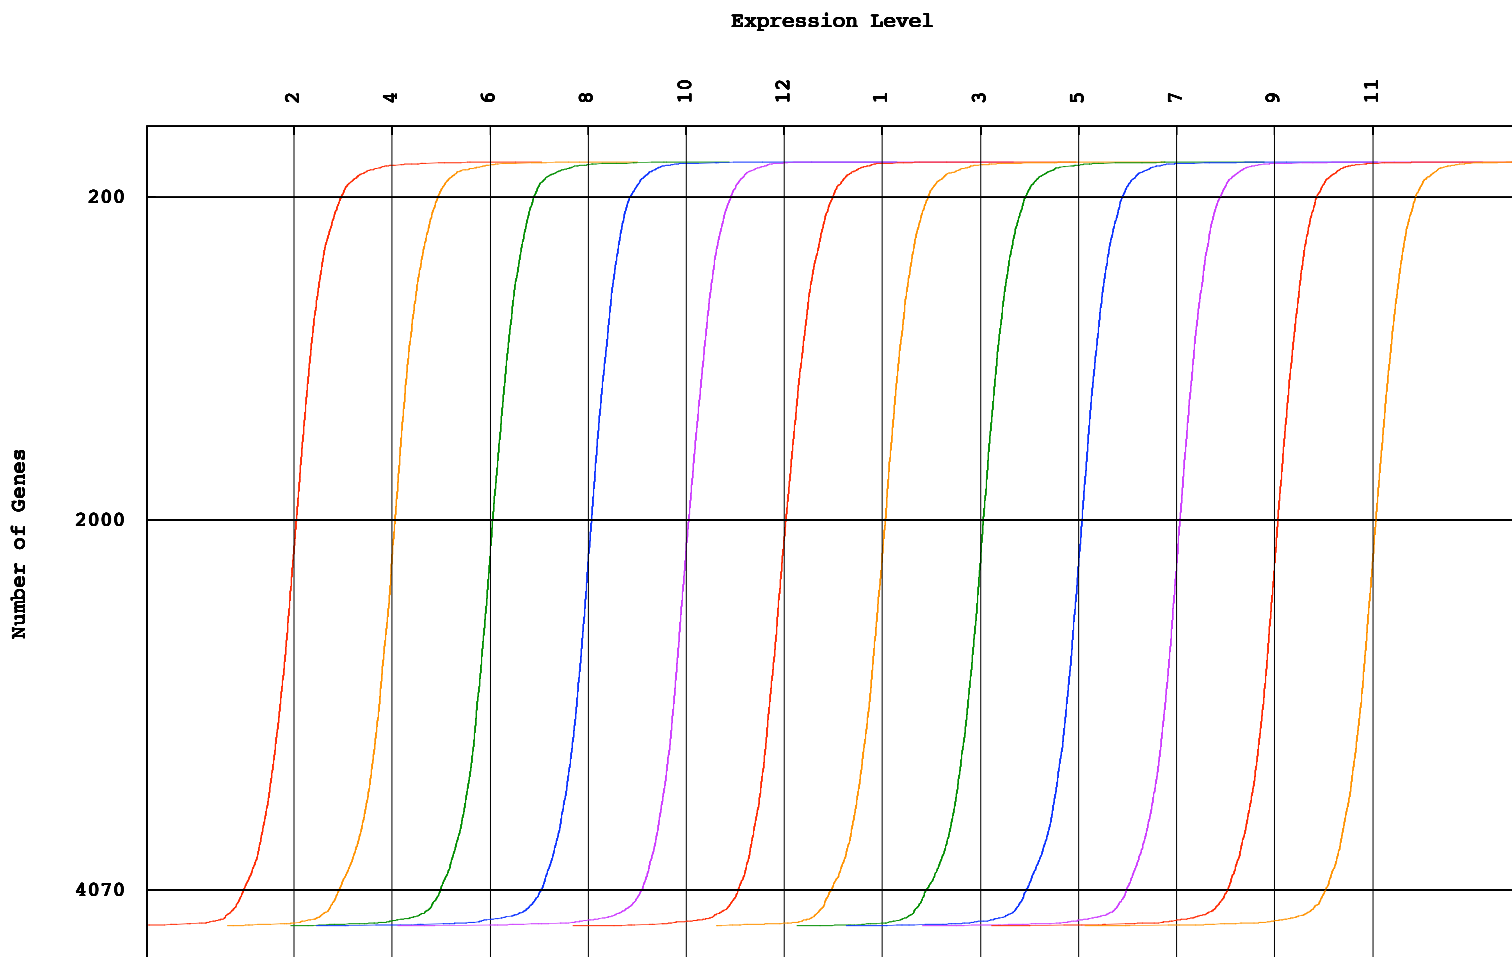

(\* Associate with Cell Cycle Phases \*)

(\* Compute Significance of Association with Cell Cycle Phases \*)

```
stream = "Desktop/96/Data/Gene_Annotations.txt";  
geneannotations = Import[stream, "Table"];  
geneannotationnames = geneannotations[[1]];  
geneannotations = Drop[geneannotations, {1}];  
Dimensions[geneannotations][[1]]  
Clear[stream];
```

4270

```

expression = AppendRows [
  ReplaceAll [TakeColumns [geneannotations, {7}],
    {"M/G1" -> "Y", "G1" -> "N", "S" -> "N", "S/G2" -> "N", "G2/M" -> "N", "None" -> "N"}],
  ReplaceAll [TakeColumns [geneannotations, {7}],
    {"M/G1" -> "N", "G1" -> "Y", "S" -> "N", "S/G2" -> "N", "G2/M" -> "N", "None" -> "N"}],
  ReplaceAll [TakeColumns [geneannotations, {7}],
    {"M/G1" -> "N", "G1" -> "N", "S" -> "Y", "S/G2" -> "N", "G2/M" -> "N", "None" -> "N"}],
  ReplaceAll [TakeColumns [geneannotations, {7}],
    {"M/G1" -> "N", "G1" -> "N", "S" -> "N", "S/G2" -> "Y", "G2/M" -> "N", "None" -> "N"}],
  ReplaceAll [TakeColumns [geneannotations, {7}],
    {"M/G1" -> "N", "G1" -> "N", "S" -> "N", "S/G2" -> "N", "G2/M" -> "Y", "None" -> "N"}]];
annotationnames = {"M/G1", "G1", "S", "S/G2", "G2/M"};
annotations = Dimensions [annotationnames] [[1]];

most = 200;
numbers = Table [Count [TakeColumns [expression, {n}], {"Y"}], {n, 1, annotations}];
parallelnumbers = Table [
  Count [
    TakeRows [
      TakeColumns [
        Sort [
          AppendRows [TakeColumns [tensor[[3]], {a}], TakeColumns [expression, {n}], OrderedQ[{{#2}, {#1}]] &,
            {2}],
          {1, most}],
        {"Y"}], {n, 1, annotations}, {a, 1, xarrays}];
parallelprobability = Table [
  Sum [N [Binomial [numbers [[n]], b] * Binomial [zgenes - numbers [[n]], most - b] /
    Binomial [zgenes, most]], {b, parallelnumbers [[n, a], most]},
  {n, 1, annotations}, {a, 1, xarrays}];
antinumbers = Table [
  Count [
    TakeRows [
      TakeColumns [
        Sort [
          AppendRows [TakeColumns [tensor[[3]], {a}], TakeColumns [expression, {n}], OrderedQ[{{#1}, {#2}]] &,
            {2}],
          {1, most}],
        {"Y"}], {n, 1, annotations}, {a, 1, xarrays}];
antiprobability = Table [
  Sum [N [Binomial [numbers [[n]], b] * Binomial [zgenes - numbers [[n]], most - b] /
    Binomial [zgenes, most]], {b, antinumbers [[n, a], most]},
  {n, 1, annotations}, {a, 1, xarrays}];

```

(\* Tabulate Significance of Association with Cell Cycle Phases \*)

```
ScientificForm[TableForm[Transpose[
  AppendColumns[
    AppendColumns[
      Transpose[AppendColumns[{{"Parallel"}}, {"Association"}], Transpose[{xarraynames}]]],
      Transpose[AppendColumns[{{" "}}, {" "}], Table[{" "}, {a, 1, xarrays}]]]],
  AppendRows[
    Table[{" "}, {a, 1, annotations}],
    Transpose[{annotationnames}],
    parallelprobability]]], 2]
```

| Parallel Association | M/G1                 | G1                    | S                     | S/G2                 | G2/M                  |
|----------------------|----------------------|-----------------------|-----------------------|----------------------|-----------------------|
| 2                    | $1.1 \times 10^{-6}$ | $6.8 \times 10^{-2}$  | $9.4 \times 10^{-2}$  | $4. \times 10^{-1}$  | $3.4 \times 10^{-1}$  |
| 4                    | $4.6 \times 10^{-4}$ | $2.2 \times 10^{-14}$ | $2.3 \times 10^{-1}$  | $6. \times 10^{-1}$  | 1.                    |
| 6                    | $3.6 \times 10^{-1}$ | $7.5 \times 10^{-40}$ | $2. \times 10^{-5}$   | $7.9 \times 10^{-1}$ | 1.                    |
| 8                    | $9.8 \times 10^{-1}$ | $2.2 \times 10^{-14}$ | $6.9 \times 10^{-10}$ | $2.4 \times 10^{-3}$ | $9.9 \times 10^{-1}$  |
| 10                   | $9.8 \times 10^{-1}$ | $8.7 \times 10^{-1}$  | $2. \times 10^{-5}$   | $7.3 \times 10^{-8}$ | $2.2 \times 10^{-3}$  |
| 12                   | $3.6 \times 10^{-1}$ | 1.                    | $9.4 \times 10^{-2}$  | $2.1 \times 10^{-2}$ | $2.2 \times 10^{-15}$ |
| 1                    | $1.2 \times 10^{-4}$ | $7.8 \times 10^{-1}$  | $2.3 \times 10^{-1}$  | $4. \times 10^{-1}$  | $8. \times 10^{-1}$   |
| 3                    | $1.7 \times 10^{-3}$ | $1. \times 10^{-4}$   | $4.4 \times 10^{-1}$  | $4. \times 10^{-1}$  | $9.7 \times 10^{-1}$  |
| 5                    | $2. \times 10^{-1}$  | $3.9 \times 10^{-15}$ | $2.6 \times 10^{-3}$  | $4. \times 10^{-1}$  | $9.9 \times 10^{-1}$  |
| 7                    | $3.6 \times 10^{-1}$ | $6.6 \times 10^{-16}$ | $2. \times 10^{-5}$   | $2.3 \times 10^{-1}$ | $9.9 \times 10^{-1}$  |
| 9                    | $9.8 \times 10^{-1}$ | $1. \times 10^{-4}$   | $3.2 \times 10^{-6}$  | $2.4 \times 10^{-3}$ | $6.6 \times 10^{-1}$  |
| 11                   | $9.8 \times 10^{-1}$ | $6.6 \times 10^{-1}$  | $2. \times 10^{-5}$   | $1.9 \times 10^{-4}$ | $4.9 \times 10^{-1}$  |

```
ScientificForm[TableForm[Transpose[
  AppendColumns[
    AppendColumns[
      Transpose[AppendColumns[{{"Antiparallel"}}, {"Association"}], Transpose[{xarraynames}]]],
      Transpose[AppendColumns[{{" "}}, {" "}], Table[{" "}, {a, 1, xarrays}]]]],
  AppendRows[
    Table[{" "}, {a, 1, annotations}],
    Transpose[{annotationnames}],
    antiprobability]]], 2]
```

| Antiparallel Association | M/G1                  | G1                    | S                    | S/G2                 | G2/M                  |
|--------------------------|-----------------------|-----------------------|----------------------|----------------------|-----------------------|
| 2                        | $9.7 \times 10^{-2}$  | $8.7 \times 10^{-1}$  | $1.1 \times 10^{-4}$ | $2.3 \times 10^{-1}$ | $6.5 \times 10^{-6}$  |
| 4                        | $2. \times 10^{-7}$   | $9.9 \times 10^{-1}$  | $9.4 \times 10^{-2}$ | $4. \times 10^{-1}$  | $2.9 \times 10^{-16}$ |
| 6                        | $1.7 \times 10^{-16}$ | $9.7 \times 10^{-1}$  | 1.                   | $4. \times 10^{-1}$  | $4.9 \times 10^{-26}$ |
| 8                        | $1.1 \times 10^{-25}$ | $7.8 \times 10^{-1}$  | 1.                   | $4. \times 10^{-1}$  | $1.5 \times 10^{-10}$ |
| 10                       | $6.3 \times 10^{-27}$ | $2.8 \times 10^{-4}$  | $9.2 \times 10^{-1}$ | $6. \times 10^{-1}$  | $8.1 \times 10^{-5}$  |
| 12                       | $1.3 \times 10^{-11}$ | $1.6 \times 10^{-36}$ | $5.8 \times 10^{-4}$ | $9.2 \times 10^{-1}$ | $6.6 \times 10^{-1}$  |
| 1                        | $1.2 \times 10^{-4}$  | $6.6 \times 10^{-1}$  | $2.6 \times 10^{-3}$ | $7.9 \times 10^{-1}$ | $5.8 \times 10^{-3}$  |
| 3                        | $1.1 \times 10^{-6}$  | $9.4 \times 10^{-1}$  | $2.6 \times 10^{-3}$ | $9.2 \times 10^{-1}$ | $4. \times 10^{-7}$   |
| 5                        | $1.7 \times 10^{-13}$ | $8.7 \times 10^{-1}$  | 1.                   | $7.9 \times 10^{-1}$ | $2.6 \times 10^{-11}$ |
| 7                        | $9.3 \times 10^{-20}$ | $9.4 \times 10^{-1}$  | 1.                   | $6. \times 10^{-1}$  | $2.6 \times 10^{-11}$ |
| 9                        | $4.7 \times 10^{-22}$ | $5.3 \times 10^{-1}$  | 1.                   | $4. \times 10^{-1}$  | $4. \times 10^{-7}$   |
| 11                       | $4.7 \times 10^{-22}$ | $1.9 \times 10^{-1}$  | $4.4 \times 10^{-1}$ | $4. \times 10^{-1}$  | $6.5 \times 10^{-6}$  |

(\* Create Bar Chart Display of Significance of Association with Cell Cycle Phases \*)

```

color = {RGBColor[1, 1, 0], RGBColor[0, 0.5, 0], RGBColor[0, 0, 1],
  RGBColor[1, 0, 0], RGBColor[1, 0.5, 0]};
arrowcolor = {RGBColor[0, 0, 0], RGBColor[1, 1, 1], RGBColor[1, 1, 1],
  RGBColor[1, 1, 1], RGBColor[1, 1, 1]};
gridx = {{Log[10, 10^-6], {RGBColor[0, 0, 0], Dashing[{0.06, 0.04}]}, {0, RGBColor[0, 0, 0]},
  {-Log[10, 10^-6], {RGBColor[0, 0, 0], Dashing[{0.06, 0.04}]}}};
framex = {{Log[10, 10^-6], "6"}, {0, "0"}, {-Log[10, 10^-6], "6"}};
labelx = Table[StyleForm[annotationnames[[a]], FontSize -> 12], {a, 1, 5}];
framey = Table[{xarrays - n + 1, xarraynames[[n]]}, {n, 1, xarrays}];
p = Table[0, {a, 1, annotations}];

Do[{paraleltable = Table[If[
  -Log[10, parallelprobability][[n, xarrays - a + 1]] > 9,
  9, -Log[10, parallelprobability][[n, xarrays - a + 1]]],
  {a, 1, xarrays}],
  antitable = Table[If[Log[10, antiprobability][[n, xarrays - a + 1]] < -9,
  -9, Log[10, antiprobability][[n, xarrays - a + 1]]], {a, 1, xarrays}],
  g = StackedBarChart[
  paraleltable, antitable,
  BarOrientation -> Horizontal,
  BarStyle -> color[[n]],
  Axes -> False,
  Frame -> True,
  FrameTicks -> {None, framey, framex, None},
  FrameLabel -> {None, None, labelx[[n]], None},
  GridLines -> {gridx, {{6.5, {RGBColor[0, 0, 0], Thickness[0.0044]}}}},
  PlotRange -> {{Log[10, 10^-9] * 1.01, -Log[10, 10^-9] * 1.01}, {0.5, xarrays + 0.5}},
  DisplayFunction -> Identity],
  g = FullGraphics[g],
  g[[1, 2]] = g[[1, 2]] /.
  Text[labelx[[n]], {b_, c_}, {0., -1.}] ->
  Text[labelx[[n]], {b, c + 1}, {0, -1}, {1, 0}],
  p[[n]] = Show[{g,
  Graphics[{arrowcolor[[n]], Arrow[{-15, 0.5}, {-15, 6.5},
  HeadCenter -> 0.5, HeadLength -> 0.1, HeadWidth -> 0.75]}],
  Graphics[{arrowcolor[[n]], Arrow[{-15, 6.5}, {-15, 0.5},
  HeadCenter -> 0.5, HeadLength -> 0.1, HeadWidth -> 0.75]}],
  Graphics[{arrowcolor[[n]], Arrow[{-15, 6.5}, {-15, 12.5},
  HeadCenter -> 0.5, HeadLength -> 0.1, HeadWidth -> 0.75]}],
  Graphics[{arrowcolor[[n]], Arrow[{-15, 12.5}, {-15, 6.5},
  HeadCenter -> 0.5, HeadLength -> 0.1, HeadWidth -> 0.75]}],
  Graphics[{arrowcolor[[n]], Line[{{-13.5, 0.5}, {-16.5, 0.5}}]},
  Graphics[{arrowcolor[[n]], Line[{{-13.5, 6.5}, {-16.5, 6.5}}]},
  Graphics[{arrowcolor[[n]], Line[{{-13.5, 12.5}, {-16.5, 12.5}}]}]},
  PlotRange -> All,
  AspectRatio -> 2,
  DisplayFunction -> Identity}],
  {n, 1, annotations}]

```



(\* Display Significance of Associations with Cell Cycle Phases \*)

```

labelx = "Cell Cycle Phases";
labely = "Time Points";
Show[
  Table[Graphics[{
    Rectangle[{-9.09 * 1.01 + 15 * a, 0.5}, {9.09 + 15 * a, 12.5}, p[[a]]}], {a, 5, 1, -1}],
  AspectRatio -> 0.45,
  Frame -> True,
  FrameTicks -> False,
  FrameStyle -> {{RGBColor[1, 1, 1]}, {RGBColor[1, 1, 1]}},
  FrameLabel -> {None, labely, labelx, None}];

```

Cell Cycle Phases

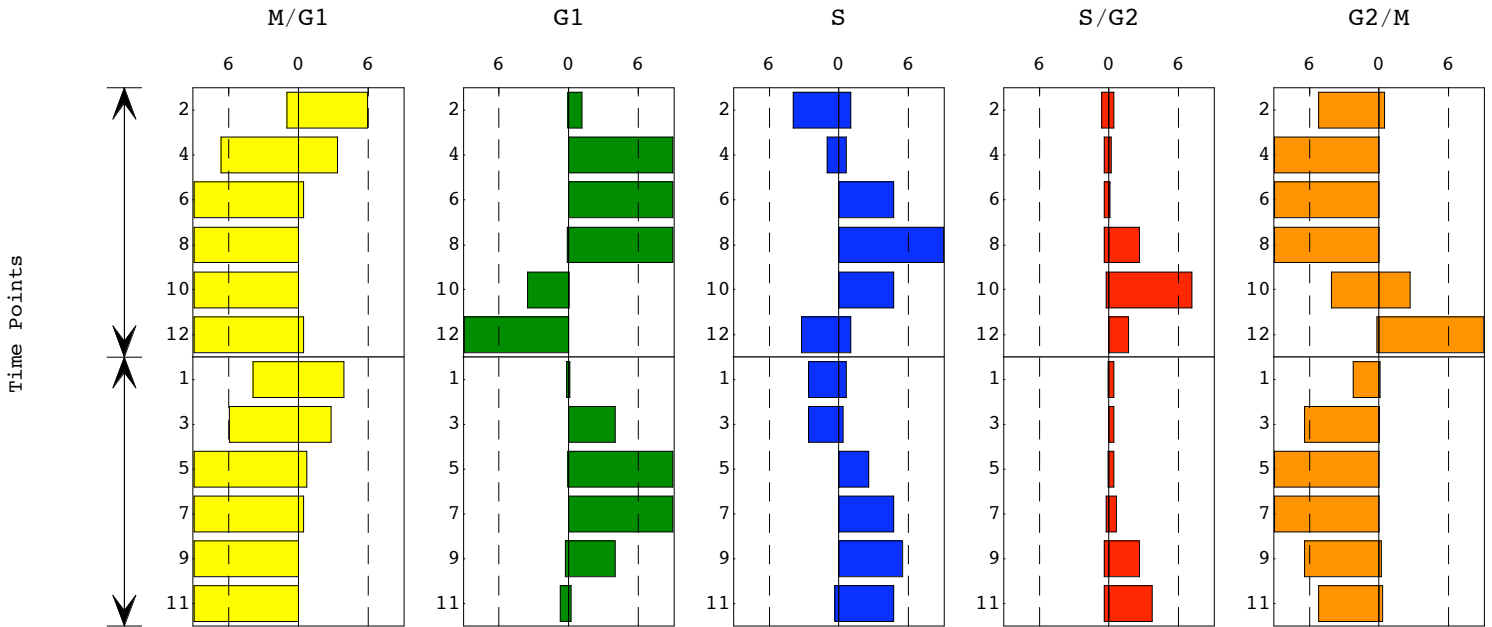

```
(* Compute Tensor HOSVD of Averaged Data Tensor *)
```

```
(* Compute HOSVD x-Eigenvalues *)
```

```
mode2 = Flatten[tensor, 1];
{eigenarrays, eigenexpressions, xeigenvalues} = SingularValues[mode2];
dimension = Dimensions[eigenexpressions][[1]];
xeigenvalues[[2]] = -xeigenvalues[[2]];
eigenarrays[[2]] = -eigenarrays[[2]];
xeigenvalues[[3]] = -xeigenvalues[[3]];
eigenarrays[[3]] = -eigenarrays[[3]];
eigenarrays = Transpose[eigenarrays];
fractions = eigenexpressions^2 / Sum[eigenexpressions[[a]]^2, {a, 1, dimension}];
entropy = -N[Sum[fractions[[a]] * Log[fractions[[a]]], {a, 1, dimension}] / Log[dimension];
entropy = N[Round[100 * entropy] / 100]
```

```
0.31
```

```
(* Create Fractions Bar Chart Display *)
```

```
fractions[[1]]
```

```
0.775266
```

```
gridx = Table[{a, RGBColor[0, 0, 0]}, {a, 0, 0.8, 0.2}];
framex = Table[{a, a}, {a, 0, 0.8, 0.2}];
framey = Table[{a + 1, dimension - a}, {a, 0, dimension - 1}];
labelx = ColumnForm[
  {"(b) Eigenexpression Fraction", StringJoin["dx = ", ToString[entropy], " "],
  Center];
g = BarChart[Table[fractions[[dimension - a]], {a, 0, dimension - 1}],
  BarOrientation -> Horizontal,
  PlotRange -> {{0, 0.8 * 1.0001}, {0.5, dimension + 0.5}},
  AspectRatio -> 1,
  Axes -> False,
  Frame -> True,
  FrameTicks -> {None, framey, framex, None},
  FrameLabel -> {None, None, labelx, None},
  GridLines -> {gridx, None},
  DisplayFunction -> Identity];
g = FullGraphics[g];
g[[1, 2]] = g[[1, 2]] /.
  Text[labelx, {b_, c_}, {0., -1.}] ->
  Text[labelx, {b, c + 0.7}, {0, -1}, {1, 0}];
g[[1, 2]] = g[[1, 2]] /.
  Text[a_, {b_, c_}, {0., -1.}] ->
  Text[a, {b, c}, {0, -1}, {0, 1}];
g2 = Show[{g},
  AspectRatio -> 1.35,
  PlotRange -> All,
  DisplayFunction -> Identity];
```

(\* Create x-Eigenenes 2D Red & Green Raster Display \*)

```
contrast = 3.6;
displaying = Table[
  If[contrast * xeigenenes[[i, j]] > 0,
    If[contrast * xeigenenes[[i, j]] < 1, {contrast * xeigenenes[[i, j]], 0}, {1, 0}],
    If[contrast * xeigenenes[[i, j]] > -1, {0, -contrast * xeigenenes[[i, j]]}, {0, 1}]],
  {i, 1, dimension}, {j, 1, xarrays}];
framex = Table[{a - 0.5, xarraynames[[a]]}, {a, 1, xarrays}];
framey = Table[{a + 1 - 0.5, dimension - a}, {a, 0, dimension - 1}];
labely = "x-Eigenenes";
labelx = ColumnForm[{"(a) x-Settings", " ", " "}, Center];
g = Show[
  Graphics[
    RasterArray[
      Table[
        RGBColor[displaying[[i, j, 1]], displaying[[i, j, 2]], 0],
        {i, dimension, 1, -1}, {j, 1, xarrays}]]],
  AspectRatio -> 1,
  Frame -> True,
  FrameTicks -> {None, framey, framex, None},
  FrameLabel -> {None, labely, labelx, None},
  GridLines -> {{{6, {RGBColor[1, 1, 1], Thickness[0.0066]}}}, None},
  DisplayFunction -> Identity];
g = FullGraphics[g];
g[[1, 2]] = g[[1, 2]] /.
  Text[labely, {b_, c_}, {1., 0.}] ->
  Text[labely, {b - 1.5, c}, {0, 0}, {0, 1}];
g[[1, 2]] = g[[1, 2]] /.
  Text[labelx, {b_, c_}, {0., -1.}] ->
  Text[labelx, {b, c + 0.7}, {0, -1}, {1, 0}];
g[[1, 2]] = g[[1, 2]] /.
  Text[a_, {b_, c_}, {0., -1.}] ->
  Text[a, {b, c}, {0, -1}, {0, 1}];
g1 = Show[{g, arrows[0, 6, 12, 10.5, 0.375]},
  AspectRatio -> 1.05,
  PlotRange -> All,
  DisplayFunction -> Identity];
```

(\* Create Selected x-Eigenenes Graph Display \*)

```
p = Table[0, {n, 1, 3}];
color = {RGBColor[1, 0, 0], RGBColor[0, 0, 1], RGBColor[0, 0.5, 0], RGBColor[1, 0.5, 0]};
labelx = ColumnForm[{"(c) x-Settings"}, Center];
labely = ColumnForm[{" ", "Expression Level"}, Center];
framex = Table[{a - 1, xarraynames[[a]]}, {a, 1, xarrays}];
framey = {-0.5, 0, 0.5};
```

```

Do[{coordinates = Table[{a - 1, xeigengenes[[n, a]]}, {a, 1, xarrays}],
  points = Table[Point[coordinates[[a]]], {a, 1, xarrays}],
  line = Line[coordinates],
  g = Show[{Graphics[{color[[n]], PointSize[0.022], points}],
    Graphics[{color[[n]], Thickness[0.0044], line}]],
  Frame -> True,
  FrameLabel -> {None, labely, labelx, None},
  FrameTicks -> {None, framey, framex, None},
  PlotRange -> {-0.7, 0.8},
  GridLines -> {{{5.5, RGBColor[0, 0, 0]}}, {{0, RGBColor[0, 0, 0]}}},
  DisplayFunction -> Identity],
g = FullGraphics[g],
g[[1, 2]] = g[[1, 2]] /.
  Text[labely, {b_, c_}, {1., 0.}] ->
  Text[labely, {b - 2, c}, {0, 0}, {0, 1}],
g[[1, 2]] = g[[1, 2]] /.
  Text[labelx, {b_, c_}, {0., -1.}] ->
  Text[labelx, {b, c + 0.3}, {0, -1}, {1, 0}],
g[[1, 2]] = g[[1, 2]] /.
  Text[a_, {b_, c_}, {0., -1.}] ->
  Text[a, {b, c}, {0, -1}, {0, 1}],
p[[n]] = Show[g,
  AspectRatio -> 1.05,
  PlotRange -> All,
  DisplayFunction -> Identity]],
{n, 1, 3}]
g3 = Show[{
  cycle[0, 0.695, 0.795],
  arrows[-0.25, 5.5, 11.25, 1.0125, 0.05],
  p[[3]], p[[2]], p[[1]],
  AspectRatio -> 1.05,
  PlotRange -> All,
  DisplayFunction -> Identity];

```

(\* Display x-Eigengenes, Fractions and Selected x-Eigengenes \*)

```

Show[GraphicsArray[{g1, g2, g3}],
  GraphicsSpacing -> -0.16];

```

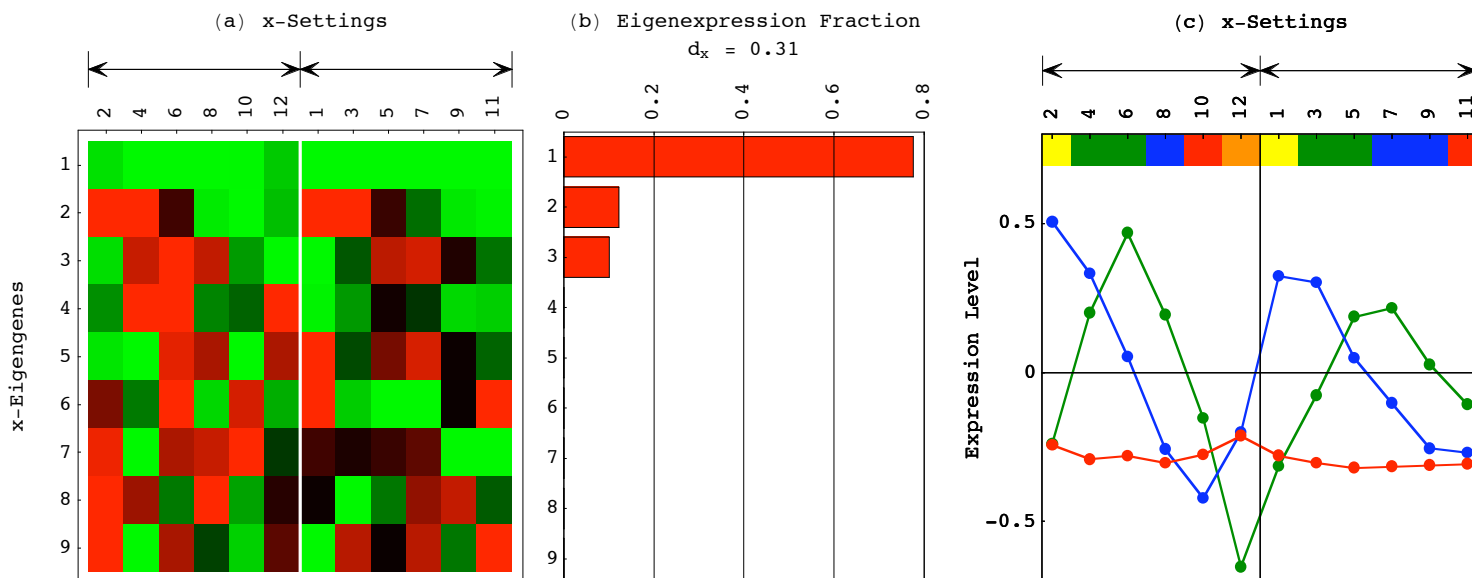

```
(* Compute HOSVD y-Eigenvalues *)
```

```
mode3 = Flatten[Transpose[tensor, {3, 1, 2}], 1];
yarraynames = Flatten[Transpose[tensornames, {3, 1, 2}], 1][[xarrays]];
{eigenarrays, eigenexpressions, yeigenvalues} = SingularValues[mode3];
yeigenvalues[[1]] = -yeigenvalues[[1]];
eigenarrays[[1]] = -eigenarrays[[1]];
yeigenvalues[[2]] = -yeigenvalues[[2]];
eigenarrays[[2]] = -eigenarrays[[2]];
eigenarrays = Transpose[eigenarrays];
fractions = eigenexpressions^2 / Sum[eigenexpressions[[a]]^2, {a, 1, yarrays}];
entropy = -N[Sum[fractions[[a]] * Log[fractions[[a]]], {a, 1, yarrays}] / Log[yarrays];
entropy = N[Round[100 * entropy] / 100]
```

0.38

```
(* Create Fractions Bar Chart Display *)
```

```
gridx = Table[a, {a, 0, 1.0, 0.2}];
framex = Table[{gridx[[a]], gridx[[a]]}, {a, 1, 6}];
framex[[6]] = {1, "1"};
gridx = Table[{gridx[[a]], RGBColor[0, 0, 0]}, {a, 1, 6}];
framey = Table[{a + 1, yarrays - a}, {a, 0, yarrays - 1}];
labelx = ColumnForm[
  {"(b) Eigenexpression Fraction", StringJoin["dy = ", ToString[entropy]], " "},
  Center];
g = BarChart[
  Table[fractions[[yarrays - a]], {a, 0, yarrays - 1}],
  BarOrientation -> Horizontal,
  PlotRange -> {{0, 1.0001}, {0.5, yarrays + 0.5}},
  AspectRatio -> 1,
  Axes -> False,
  Frame -> True,
  FrameTicks -> {None, framey, framex, None},
  FrameLabel -> {None, None, labelx, None},
  GridLines -> {gridx, None},
  DisplayFunction -> Identity];
g = FullGraphics[g];
g[[1, 2]] = g[[1, 2]] /.
  Text[labelx, {b_, c_}, {0., -1.}] ->
  Text[labelx, {b, c + 0.6}, {0, -1}, {1, 0}];
g[[1, 2]] = g[[1, 2]] /.
  Text[a_, {b_, c_}, {0., -1.}] ->
  Text[a, {b, c}, {0, -1}, {0, 1}];
g2 = Show[g,
  AspectRatio -> 1.35,
  PlotRange -> All,
  DisplayFunction -> Identity];
```

```
(* Create y-Eigenenes 2D Red & Green Raster Display *)
```

```
contrast = 1.2;
displaying = Table[
  If[contrast * yeigenenes[[i, j]] > 0,
    If[contrast * yeigenenes[[i, j]] < 1, {contrast * yeigenenes[[i, j]], 0}, {1, 0}],
    If[contrast * yeigenenes[[i, j]] > -1, {0, -contrast * yeigenenes[[i, j]]}, {0, 1}],
  {i, 1, yarrays}, {j, 1, yarrays}];
framex = Table[{a - 0.5, yarraynames[[a]]}, {a, 1, yarrays}];
framey = Table[{a + 1 - 0.5, yarrays - a}, {a, 0, yarrays - 1}];
labely = "y-Eigenenes";
labelx = ColumnForm[{"(a) y-Settings", " ", " "}, Center];
g = Show[
  Graphics[
    RasterArray[
      Table[
        RGBColor[displaying[[i, j, 1]], displaying[[i, j, 2]], 0],
        {i, yarrays, 1, -1}, {j, 1, yarrays}]]],
  AspectRatio -> 1,
  Frame -> True,
  FrameTicks -> {None, framey, framex, None},
  FrameLabel -> {None, labely, labelx, None},
  DisplayFunction -> Identity];
g = FullGraphics[g];
g[[1, 2]] = g[[1, 2]] /.
  Text[labely, {b_, c_}, {1., 0.}] ->
  Text[labely, {b - 0.5, c}, {0, 0}, {0, 1}];
g[[1, 2]] = g[[1, 2]] /.
  Text[labelx, {b_, c_}, {0., -1.}] ->
  Text[labelx, {b, c + 0.65}, {0, -1}, {1, 0}];
g[[1, 2]] = g[[1, 2]] /.
  Text[a_, {b_, c_}, {0., -1.}] ->
  Text[a, {b, c}, {0, -1}, {0, 1}];
g1 = Show[g,
  AspectRatio -> 1.05,
  PlotRange -> All,
  DisplayFunction -> Identity];
```

(\* Create y-Eigenenes Graph Display \*)

```

p = Table[0, {n, 1, 3}];
color = {RGBColor[1, 0, 0], RGBColor[0, 0, 1], RGBColor[0, 0.5, 0]};
labelx = ColumnForm[{"(c) y-Settings", Center];
labely = ColumnForm[{"", "Expression Level", Center];
framex = Table[{a - 1, yarraynames[[a]]}, {a, 1, yarrays};
framey = {-1, -0.5, 0, 0.5, 1};
Do[{
  coordinates = Table[{a - 1, yeigenenes[[n, a]]}, {a, 1, yarrays}],
  points = Table[Point[coordinates[[a]], {a, 1, yarrays}],
  line = Line[coordinates],
  g = Show[
    {Graphics[{color[[n]], PointSize[0.022], points}],
    Graphics[{color[[n]], Thickness[0.0044], line}]},
    Frame -> True,
    FrameLabel -> {None, labely, labelx, None},
    GridLines -> {None, {{0, RGBColor[0, 0, 0]}}},
    FrameTicks -> {None, framey, framex, None},
    PlotRange -> {-1.05, 1.05},
    DisplayFunction -> Identity],
  g = FullGraphics[g],
  g[[1, 2]] = g[[1, 2]] /.
    Text[labely, {b_, c_}, {1., 0.}] ->
    Text[labely, {b - 0.5, c}, {0, 0}, {0, 1}],
  g[[1, 2]] = g[[1, 2]] /.
    Text[labelx, {b_, c_}, {0., -1.}] ->
    Text[labelx, {b, c + 0.7}, {0, -1}, {1, 0}],
  g[[1, 2]] = g[[1, 2]] /.
    Text[a_, {b_, c_}, {0., -1.}] ->
    Text[a, {b, c}, {0, -1}, {0, 1}],
  p[[n]] = Show[g,
    AspectRatio -> 1.05,
    PlotRange -> All,
    DisplayFunction -> Identity]],
{n, 1, 3}
g3 = Show[{p[[3]], p[[2]], p[[1]]},
  DisplayFunction -> Identity];

```

(\* Display y-Eigenenes and Fractions \*)

```

Show[GraphicsArray[{g1, g2, g3}],
  GraphicsSpacing -> -0.15];

```

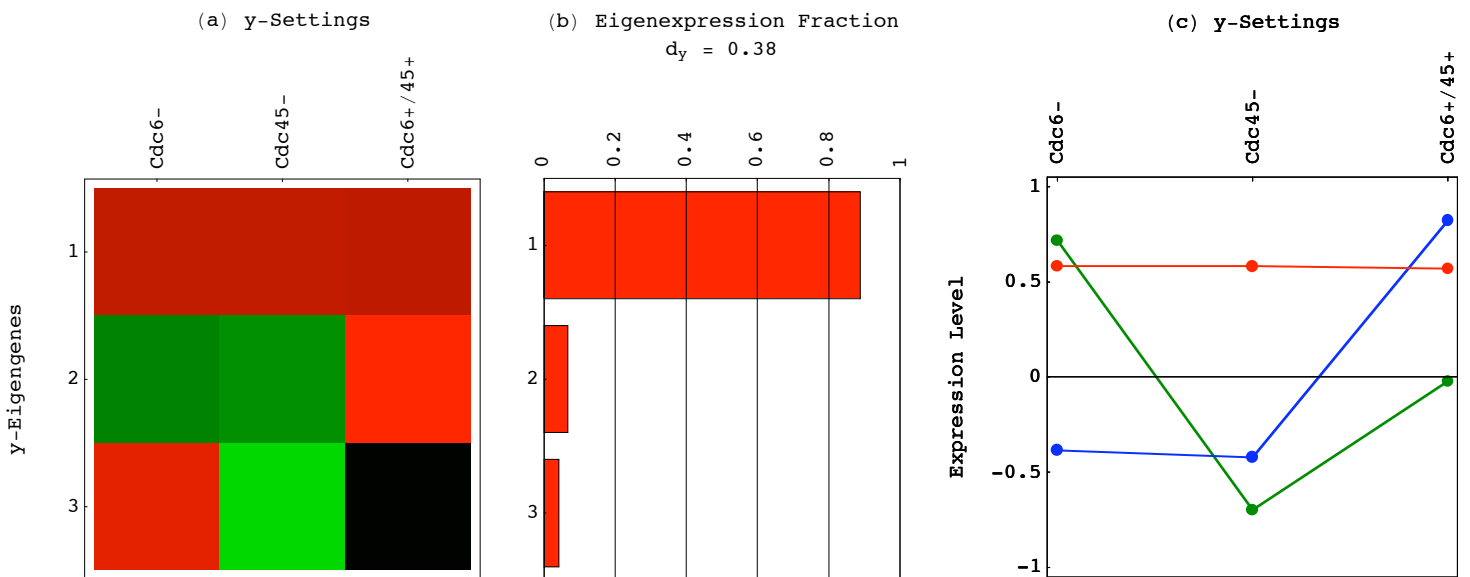

```
(* Compute HOSVD Eigenarrays *)
```

```
model = Transpose[Flatten[
  Transpose[tensor, {1, 3, 2}], 1]];
{genes, arrays} = Dimensions[model]
zarraynames = Transpose[Flatten[
  Transpose[tensornames, {1, 3, 2}], 1]][[2]];

{4270, 36}

{zeigenarrays, eigenexpressions, eigengenes} = SingularValues[model];
eigengenes[[2]] = -eigengenes[[2]];
zeigenarrays[[2]] = -zeigenarrays[[2]];
eigengenes[[3]] = -eigengenes[[3]];
zeigenarrays[[3]] = -zeigenarrays[[3]];
eigengenes[[8]] = -eigengenes[[8]];
zeigenarrays[[8]] = -zeigenarrays[[8]];
zeigenarrays = Transpose[zeigenarrays];
dimension = Dimensions[eigenexpressions][[1]];
fractions = eigenexpressions^2 / Sum[eigenexpressions[[a]]^2, {a, 1, dimension}];
entropy = -N[Sum[fractions[[a]] * Log[fractions[[a]]], {a, 1, dimension}] / Log[dimension]];
entropy = N[Round[100 * entropy] / 100]

0.49
```

```
(* Create Fractions Bar Chart Display *)
```

```
fractions[[1]]

0.723663

gridx = Table[a, {a, 0, 0.75, 0.15}];
framex = Table[{gridx[[a]], gridx[[a]]}, {a, 1, 6}];
gridx = Table[{gridx[[a]], RGBColor[0, 0, 0]}, {a, 1, 6}];
framey = Table[{a + 1, dimension - a}, {a, 0, dimension - 1}];
labelx = ColumnForm[
  {"(b) Eigenexpression Fraction", StringJoin["dz = ", ToString[entropy], " "],
  Center];
g = BarChart[
  Table[fractions[[dimension - a]], {a, 0, dimension - 1}],
  BarOrientation -> Horizontal,
  PlotRange -> {{0, 0.75 * 1.0001}, {0.5, dimension + 0.5}},
  AspectRatio -> 1,
  Axes -> False,
  Frame -> True,
  FrameTicks -> {None, framey, framex, None},
  FrameLabel -> {None, None, labelx, None},
  GridLines -> {gridx, None},
  DisplayFunction -> Identity];
g = FullGraphics[g];
g[[1, 2]] = g[[1, 2]] /.
  Text[labelx, {b_, c_}, {0., -1.}] ->
  Text[labelx, {b, c + 3.8}, {0, -1}, {1, 0}];
g[[1, 2]] = g[[1, 2]] /.
  Text[a_, {b_, c_}, {0., -1.}] ->
  Text[a, {b, c}, {0, -1}, {0, 1}];
g2 = Show[g,
  AspectRatio -> 1.35,
  PlotRange -> All,
  DisplayFunction -> Identity];
```



```
(* Create Eigenenes 2 D Red & Green Raster Display *)
```

```
length = 0.02;  
contrast = 4.8;  
displaying = Table[  
  If[contrast * eigenenes[[i, j]] > 0,  
    If[contrast * eigenenes[[i, j]] < 1, {contrast * eigenenes[[i, j]], 0}, {1, 0}],  
    If[contrast * eigenenes[[i, j]] > -1, {0, -contrast * eigenenes[[i, j]]}, {0, 1}]],  
  {i, 1, dimension}, {j, 1, xarrays * yarrays}];  
framex = Table[{a - 0.5, zarraynames[[a]]}, {a, 1, xarrays * yarrays}];  
framey = Table[{a + 1 - 0.5, dimension - a}, {a, 0, dimension - 1}];  
labely = "Eigenenes";  
labelx = ColumnForm[{"(a) Arrays", " ", " "}, Center];  
gridx = Table[{a, {RGBColor[1, 1, 1], Thickness[0.0044]}}, {a, 6, 30, 6}];  
g = Show[  
  Graphics[  
    RasterArray[  
      Table[  
        RGBColor[displaying[[i, j, 1]], displaying[[i, j, 2]], 0],  
        {i, dimension, 1, -1}, {j, 1, xarrays * yarrays}]]],  
    Graphics[{RGBColor[0, 0, 0], Text[yarraynames[[1]], {6, 14}]}],  
    Graphics[{RGBColor[0, 0, 0], Text[yarraynames[[2]], {18, 14}]}],  
    Graphics[{RGBColor[0, 0, 0], Text[yarraynames[[3]], {30, 14}]}]],  
  AspectRatio -> 1,  
  Frame -> True,  
  FrameTicks -> {None, framey, framex, None},  
  FrameLabel -> {None, labely, labelx, None},  
  GridLines -> {gridx, None},  
  PlotRange -> {-0.225, 9.225},  
  DisplayFunction -> Identity];  
g = FullGraphics[g];  
g[[1, 2]] = g[[1, 2]] /.  
  Text[labely, {b_, c_}, {1., 0.}] ->  
  Text[labely, {b - 1.6, c}, {0, 0}, {0, 1}];  
g[[1, 2]] = g[[1, 2]] /.  
  Text[labelx, {b_, c_}, {0., -1.}] ->  
  Text[labelx, {b, c + 4}, {0, -1}, {1, 0}];  
g[[1, 2]] = g[[1, 2]] /.  
  Text[a_, {b_, c_}, {0., -1.}] ->  
  Text[a, {b, c}, {0, -1}, {0, 1}];  
g1 = Show[{g,  
  arrows[0, 6, 12, 12.25, 0.375],  
  arrows[12, 18, 24, 12.25, 0.375],  
  arrows[24, 30, 36, 12.25, 0.375],  
  arrows[0, 12, 24, 13.5, 0.375],  
  arrows[12, 24, 36, 13.5, 0.375]},  
  AspectRatio -> 1.05 / 1.5,  
  PlotRange -> All,  
  DisplayFunction -> Identity];
```

(\* Create Selected Eigengenes Graph Display \*)

```
length = 0.0125;
p = Table[0, {n, 1, 6}];
color = {RGBColor[1, 0, 0], RGBColor[0, 0, 1],
  RGBColor[0, 0.5, 0], RGBColor[1, 0.5, 0], RGBColor[1, 0, 0], RGBColor[0, 0, 1]};
labelx = ColumnForm[{"(c) Arrays"}, Center];
gridx = Table[{a, RGBColor[0, 0, 0]}, {a, 5.5, 29.5, 6}];
framex = Table[{a - 1, zarraynames[[a]]}, {a, 1, xarrays * yarrays}];
labely = ColumnForm[{" ", " ", "Expression Level"}, Center];
framey = {-0.25, 0, 0.25};
Do[{
  coordinates = Table[{a - 1, eigengenes[[n, a]]}, {a, 1, xarrays * yarrays}],
  points = Table[Point[coordinates[[a]]], {a, 1, xarrays * yarrays}],
  line = Line[coordinates],
  g = Show[
    {Graphics[{color[[n]], PointSize[0.011], points}],
    Graphics[{color[[n]], Thickness[0.0022], line}],
    Graphics[{RGBColor[0, 0, 0], Text[yarraynames[[1]], {5.5, 0.82}]}],
    Graphics[{RGBColor[0, 0, 0], Text[yarraynames[[2]], {17.5, 0.82}]}],
    Graphics[{RGBColor[0, 0, 0], Text[yarraynames[[3]], {29.5, 0.82}]}]},
  Frame -> True,
  FrameLabel -> {None, labely, labelx, " "},
  GridLines -> {gridx, {{0, RGBColor[0, 0, 0]}}},
  FrameTicks -> {None, framey, framex, None},
  PlotRange -> {{-0.5, 35.5}, {-0.45, 0.45}},
  DisplayFunction -> Identity],
g = FullGraphics[g],
g[[1, 2]] = g[[1, 2]] /.
  Text[labely, {b_, c_}, {1., 0.}] ->
  Text[labely, {b - 3, c}, {0, 0}, {0, 1}],
g[[1, 2]] = g[[1, 2]] /.
  Text[labelx, {b_, c_}, {0., -1.}] ->
  Text[labelx, {b, c + 0.4}, {0, -1}, {1, 0}],
g[[1, 2]] = g[[1, 2]] /.
  Text[a_, {b_, c_}, {0., -1.}] ->
  Text[a, {b, c}, {0, -1}, {0, 1}],
p[[n]] = Show[g,
  AspectRatio -> 1.05 / 2.05,
  PlotRange -> All,
  DisplayFunction -> Identity]],
{n, 1, 4}]
g3 = Show[{
  cycle[24, 0.4, 0.45],
  arrows[-0.5, 5.5, 11.5, 0.66, 0.025],
  arrows[11.5, 17.5, 23.5, 0.66, 0.025],
  arrows[23.5, 29.5, 35.5, 0.66, 0.025],
  arrows[-0.5, 11.5, 23.5, 0.77, 0.025],
  arrows[11.5, 23.5, 35.5, 0.77, 0.025],
  p[[4]], p[[3]], p[[2]], p[[1]]},
  AspectRatio -> 1.05 / 2,
  PlotRange -> All,
  DisplayFunction -> Identity];
```

(\* Display Eigengenes, Fractions and Selected Eigengenes \*)

```
Show[GraphicsArray[{g1, g2}],
GraphicsSpacing -> -0.3];
```

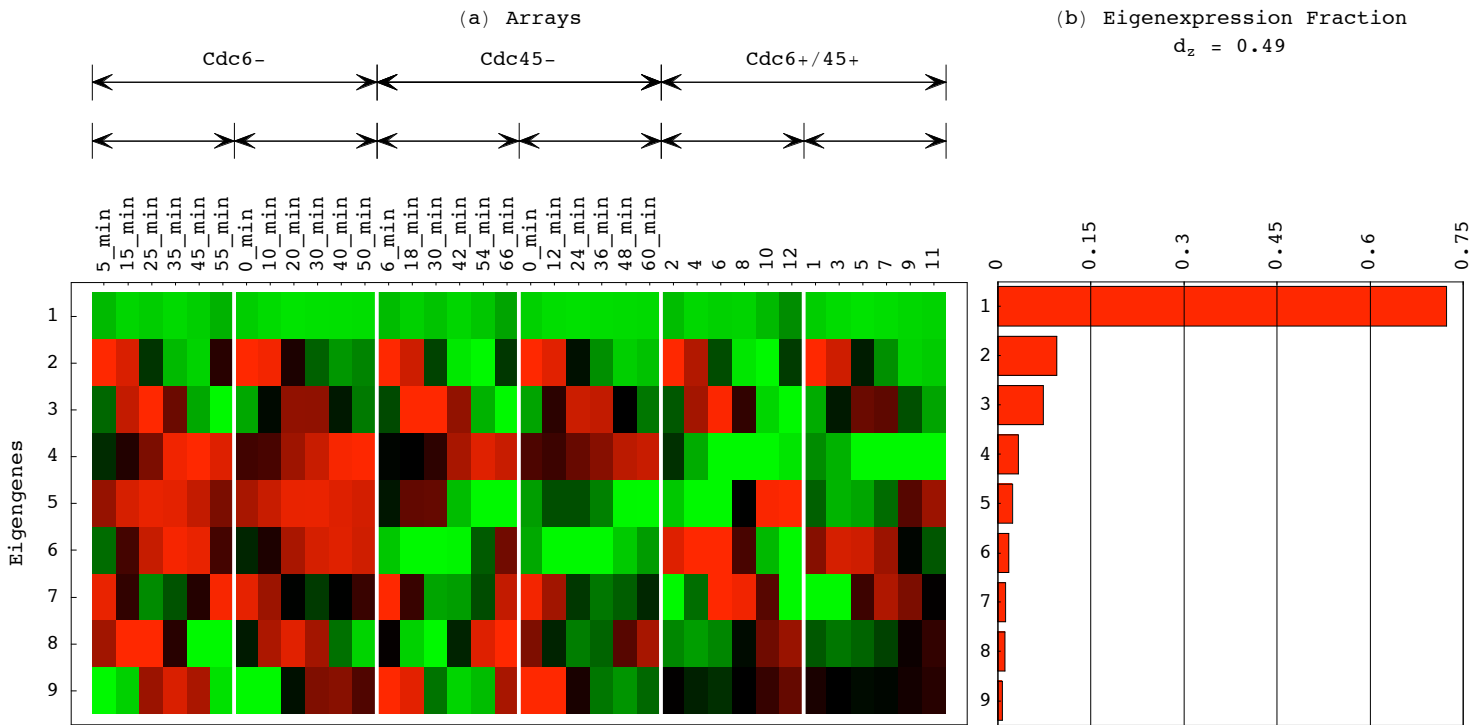

```
Show[GraphicsArray[{g3}]];
```

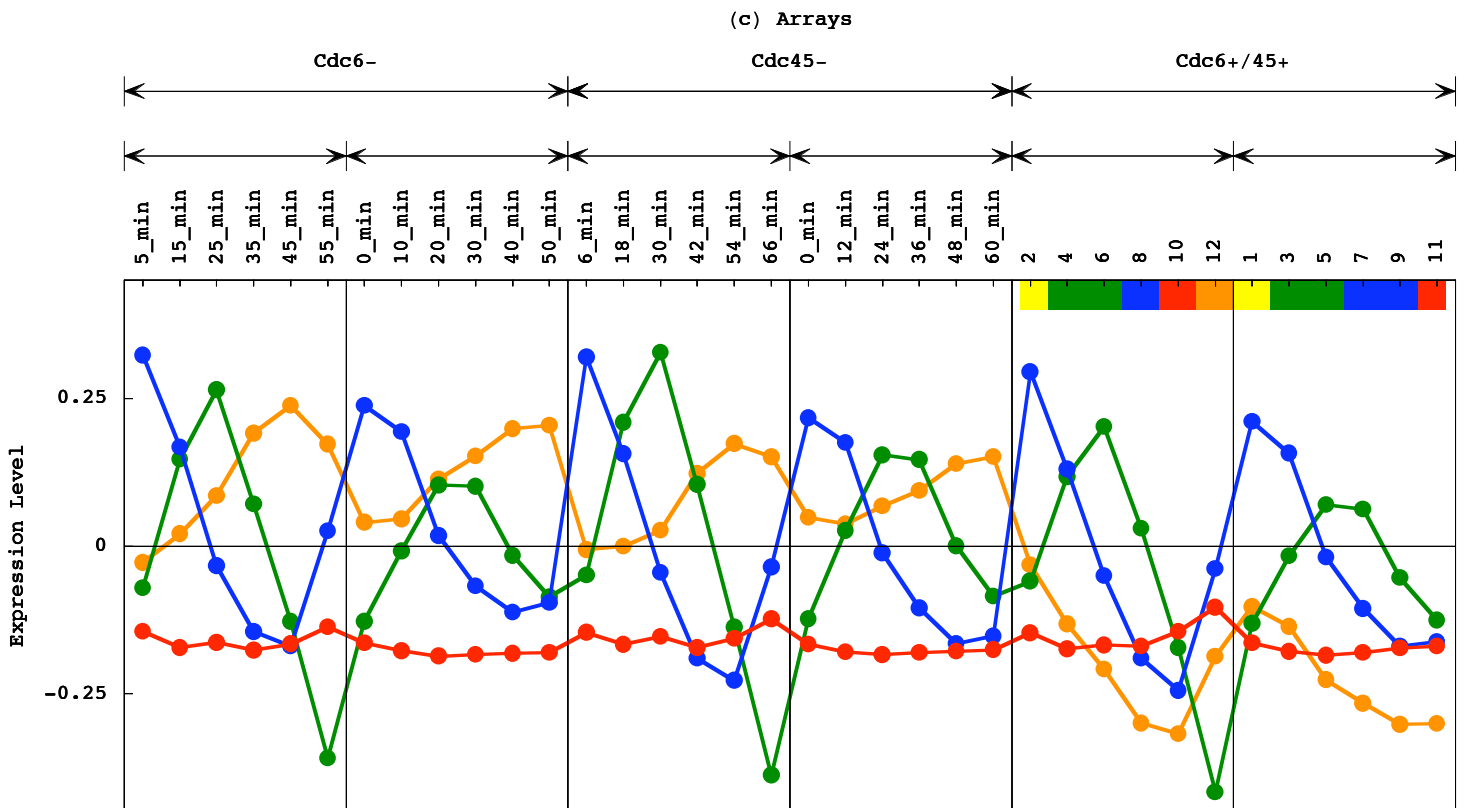

```
(* Compute Core and Subtensors *)
```

```
(* Compute Core Tensor *)
```

```
core = Transpose[tensor, {3, 1, 2}];  
core = Dot[Transpose[zeigenarrays], core];  
core = Transpose[core, {2, 3, 1}];  
core = Dot[core, Transpose[xeigengenes]];  
core = Transpose[core, {3, 1, 2}];  
core = Dot[core, Transpose[yeigengenes]];  
core = Transpose[core, {2, 3, 1}];
```

```
(* Compute Subtensors and Fractions *)
```

```
fractions = Sort[Abs[Flatten[core]], OrderedQ[{{#2}, {#1}}] &];  
dimension = Dimensions[fractions][[1]];  
subtensors = Table[Flatten[  
  If[  
    Position[core, fractions[[a]] == {},  
    {-1, Position[core, -fractions[[a]]}],  
    {1, Position[core, fractions[[a]]}}  
  ], {a, 1, 8}];  
signs = Flatten[TakeColumns[subtensors, {1}]];  
subtensors = AppendRows[  
  TakeColumns[subtensors, {3, 4}],  
  TakeColumns[subtensors, {2}]];  
fractions = fractions^2 / Sum[fractions[[a]]^2, {a, 1, dimension}];  
entropy = -N[Sum[fractions[[a]] * Log[fractions[[a]]], {a, 1, dimension}] /  
  Log[dimension];  
entropy = N[Round[100 * entropy] / 100]
```

0.23

```
(* Identify and Display Significant Subtensors *)
```

```
(* Identify Significant Subtensors *)
```

```
r[z_, x_, y_] := Position[subtensors, {z, x, y}][[1, 1]];  
rfractions = {  
  fractions[[r[1, 1, 1]]],  
  fractions[[r[2, 2, 1]]],  
  fractions[[r[3, 3, 1]]],  
  fractions[[r[4, 1, 2]]],  
  fractions[[r[5, 1, 3]]],  
  fractions[[r[6, 1, 3]]],  
  fractions[[r[7, 3, 2]]],  
  fractions[[r[8, 3, 3]]];
```

```
(* Create Significant Fractions Bar Charts Display *)
```

```
rsubtensors = {  
  {" 1", "1", "1"},  
  {" 2", "2", "1"},  
  {" 3", "3", "1"},  
  {" 4", "1", "2"},  
  {" 5", "1", "3"},  
  {" 6", "1", "3"},  
  {" 7", "3", "2"},  
  {" 8", "3", "3"};
```

```

rsigns = {
  signs[[r[1, 1, 1]]],
  signs[[r[2, 2, 1]]],
  signs[[r[3, 3, 1]]],
  signs[[r[4, 1, 2]]],
  signs[[r[5, 1, 3]]],
  signs[[r[6, 1, 3]]],
  signs[[r[7, 3, 2]]],
  signs[[r[8, 3, 3]]]};

rfractions[[5]]

0.0108561

gridx = Table[a, {a, 0, 0.012, 0.003}];
framex = Table[{gridx[[a]], gridx[[a]]}, {a, 1, 5}];
gridx = Table[{gridx[[a]], RGBColor[0, 0, 0]}, {a, 1, 5}];
framey = Table[{8 - a + 1, StringJoin[
  " ", ToString[rsubtensors[[a, 1]]],
  " ", ToString[rsubtensors[[a, 2]]],
  " ", ToString[rsubtensors[[a, 3]]]}],
  {a, 5, 8}];
table = Table[rfractions[[9 - a]], {a, 1, 4}];
g = BarChart[table,
  BarOrientation -> Horizontal,
  PlotRange -> {{0, 0.012 * 1.0001}, {0.5, 4 + 0.5}},
  AspectRatio -> 1,
  Axes -> False,
  Frame -> True,
  FrameTicks -> {None, framey, framex, None},
  FrameLabel -> {None, None, None, None},
  GridLines -> {gridx, None},
  DisplayFunction -> Identity];
g = FullGraphics[g];
g[[1, 2]] = g[[1, 2]] /.
  Text[a_, {b_, c_}, {0., -1.}] ->
  Text[a, {b, c}, {0, -1}, {0, 1}];
g2 = Show[g,
  AspectRatio -> 1.3,
  PlotRange -> All,
  DisplayFunction -> Identity];

rfractions[[1]]

0.722771

gridx = Table[a, {a, 0, 0.75, 0.15}];
framex = Table[{gridx[[a]], gridx[[a]]}, {a, 1, 6}];
gridx = Table[{gridx[[a]], RGBColor[0, 0, 0]}, {a, 1, 6}];
framey = Table[{8 - a + 1, StringJoin[
  " ", ToString[rsubtensors[[a, 1]]],
  " ", ToString[rsubtensors[[a, 2]]],
  " ", ToString[rsubtensors[[a, 3]]]}],
  {a, 1, 8}];
labelx = ColumnForm[
  {"(a) Eigenexpression Fraction", StringJoin["d = ", ToString[entropy], " "], Center];
labely = ColumnForm[{"Subtensors", " "}, Center];
g = BarChart[
  Table[rfractions[[8 - a]], {a, 0, 8 - 1}],
  BarOrientation -> Horizontal,
  PlotRange -> {{0, 0.75 * 1.0001}, {0.5, 8 + 0.5}},
  AspectRatio -> 1,
  Axes -> False,
  Frame -> True,
  FrameTicks -> {None, framey, framex, None},
  FrameLabel -> {None, labely, labelx, " "},
  GridLines -> {gridx, None},
  DisplayFunction -> Identity];

```

```

g = FullGraphics[g];
g[[1, 2]] = g[[1, 2]] /.
  Text[labely, {b_, c_}, {1., 0.}] ->
  Text[labely, {b - 0.22, c}, {0, 0}, {0, 1}];
g[[1, 2]] = g[[1, 2]] /.
  Text[labelx, {b_, c_}, {0., -1.}] ->
  Text[labelx, {b, c + 1.3}, {0, -1}, {1, 0}];
g[[1, 2]] = g[[1, 2]] /.
  Text[a_, {b_, c_}, {0., -1.}] ->
  Text[a, {b, c}, {0, -1}, {0, 1}];
g1 = Show[{
  Graphics[Table[{GrayLevel[0.1 * rsigns[[8 - a]] + 0.9],
    Rectangle[{0, a + 0.55}, {-0.18, a + 1.4}], {a, 0, 7}]],
  g,
  Graphics[{RGBColor[1, 1, 0.8], Rectangle[{0.1, 0.75}, {0.72, 7.35}]}],
  Graphics[{Rectangle[{0.035, 0.75}, {0.7, 7.2}], g2}]],
  AspectRatio -> 1.05,
  PlotRange -> All,
  DisplayFunction -> Identity];

(* Create Selected x-Eigenenes Graph Display *)

length = 0.035;
p = Table[0, {n, 1, 3}];
color = {RGBColor[1, 0, 0], RGBColor[0, 0, 1], RGBColor[0, 0.5, 0], RGBColor[1, 0.5, 0]};
labelx = ColumnForm[{"(b) x-Settings"}, Center];
labely = ColumnForm[{"", "Expression Level"}, Center];
framex = Table[{a - 1, xarraynames[[a]]}, {a, 1, xarrays}];
framey = {-0.5, 0, 0.5};
Do[{
  coordinates = Table[{a - 1, xeigenenes[[n, a]]}, {a, 1, xarrays}],
  points = Table[Point[coordinates[[a]]], {a, 1, xarrays}],
  line = Line[coordinates],
  g = Show[
    {Graphics[{color[[n]], PointSize[0.022], points}],
    Graphics[{color[[n]], Thickness[0.0044], line}]},
    Frame -> True,
    FrameLabel -> {None, labely, labelx, None},
    FrameTicks -> {None, framey, framex, None},
    PlotRange -> {-0.75, 0.75},
    GridLines -> {{5.5, RGBColor[0, 0, 0]}, {0, RGBColor[0, 0, 0]}},
    DisplayFunction -> Identity],
  g = FullGraphics[g],
  g[[1, 2]] = g[[1, 2]] /.
    Text[labely, {b_, c_}, {1., 0.}] ->
    Text[labely, {b - 2, c}, {0, 0}, {0, 1}],
  g[[1, 2]] = g[[1, 2]] /.
    Text[labelx, {b_, c_}, {0., -1.}] ->
    Text[labelx, {b, c + 0.5}, {0, -1}, {1, 0}],
  g[[1, 2]] = g[[1, 2]] /.
    Text[a_, {b_, c_}, {0., -1.}] ->
    Text[a, {b, c}, {0, -1}, {0, 1}],
  p[[n]] = Show[g,
    AspectRatio -> 1.05,
    PlotRange -> All,
    DisplayFunction -> Identity]],
{n, 1, 3}]
g2 = Show[{
  cycle[0, 0.64, 0.74],
  arrows[-0.25, 5.5, 11.25, 1, 0.05],
  p[[3]], p[[2]], p[[1]]},
  AspectRatio -> 1.05,
  PlotRange -> All,
  DisplayFunction -> Identity];

```

(\* Create Rotated y-Eigengenes Graph Display \*)

```

p = Table[0, {n, 1, 3}];
color = {RGBColor[1, 0, 0], RGBColor[0, 0, 1], RGBColor[0, 0.5, 0]};
labelx = ColumnForm[{"(c) y-Settings", Center];
labely = ColumnForm[{" ", " "}, Center];
framex = Table[{a - 1, yarraynames[[a]]}, {a, 1, yarrays};
framey = {-1, -0.5, 0, 0.5, 1};
Do[{
  coordinates = Table[{a - 1, yeigengenes[[n, a]]}, {a, 1, yarrays}],
  points = Table[Point[coordinates[[a]], {a, 1, yarrays}],
  line = Line[coordinates],
  g = Show[
    {Graphics[{color[[n]], PointSize[0.022], points}],
    Graphics[{color[[n]], Thickness[0.0044], line}]},
    Frame -> True,
    FrameLabel -> {None, labely, labelx, None},
    GridLines -> {None, {{0, RGBColor[0, 0, 0]}}},
    FrameTicks -> {None, framey, framex, None},
    PlotRange -> {-1.05, 1.05},
    DisplayFunction -> Identity],
  g = FullGraphics[g],
  g[[1, 2]] = g[[1, 2]] /.
    Text[labely, {b_, c_}, {1., 0.}] ->
    Text[labely, {b - 0.5, c}, {0, 0}, {0, 1}],
  g[[1, 2]] = g[[1, 2]] /.
    Text[labelx, {b_, c_}, {0., -1.}] ->
    Text[labelx, {b, c + 0.7}, {0, -1}, {1, 0}],
  g[[1, 2]] = g[[1, 2]] /.
    Text[a_, {b_, c_}, {0., -1.}] ->
    Text[a, {b, c}, {0, -1}, {0, 1}],
  p[[n]] = Show[g,
    AspectRatio -> 1.05,
    PlotRange -> All,
    DisplayFunction -> Identity]],
{n, 1, 3}
g3 = Show[{p[[3]], p[[2]], p[[1]]},
  DisplayFunction -> Identity];

```

(\* Display Fractions, Selected x-Eigengenes and Rotated y-Eigengenes \*)

```

Show[GraphicsArray[{g1, g2, g3}],
  GraphicsSpacing -> -0.1375];

```

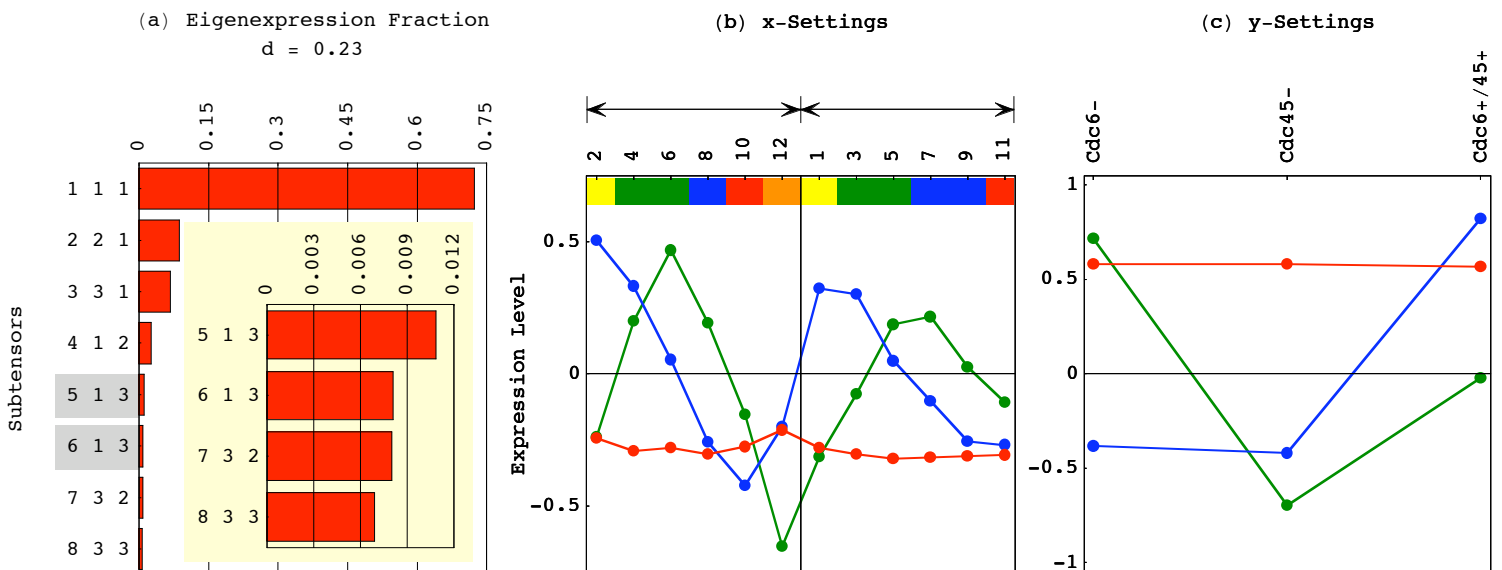

```
(* Identify and Display Significant and Unique Subtensors *)
```

```
(* Identify Significant and Unique Subtensors *)
```

```
r[z_, x_, y_] := Position[subtensors, {z, x, y}][[1, 1]];
rfractions = {
  fractions[[r[1, 1, 1]]],
  fractions[[r[2, 2, 1]]],
  fractions[[r[3, 3, 1]]],
  fractions[[r[4, 1, 2]]],
  fractions[[r[5, 1, 3]]] + fractions[[r[6, 1, 3]]],
  fractions[[r[7, 3, 2]]],
  fractions[[r[8, 3, 3]]];
```

```
(* Create Significant and Unique Fractions Bar Charts Display *)
```

```
rsubtensors = {
  {" 1", "1", "1"},
  {" 2", "2", "1"},
  {" 3", "3", "1"},
  {" 4", "1", "2"},
  {"5+6", "1", "3"},
  {" 7", "3", "2"},
  {" 8", "3", "3"};
rsigns = {
  signs[[r[1, 1, 1]]],
  signs[[r[2, 2, 1]]],
  signs[[r[3, 3, 1]]],
  signs[[r[4, 1, 2]]],
  1,
  signs[[r[7, 3, 2]]],
  signs[[r[8, 3, 3]]];

rfractions[[4]]

0.0266241

gridx = Table[a, {a, 0, 0.028, 0.007}];
framex = Table[{gridx[[a]], gridx[[a]]}, {a, 1, 5}];
gridx = Table[{gridx[[a]], RGBColor[0, 0, 0]}, {a, 1, 5}];
framey = Table[{7 - a + 1, StringJoin[
  " ", ToString[rsubtensors[[a, 1]]],
  " ", ToString[rsubtensors[[a, 2]]],
  " ", ToString[rsubtensors[[a, 3]]]}],
  {a, 4, 7}];
table = Table[rfractions[[8 - a]], {a, 1, 4}];
g = BarChart[table,
  BarOrientation -> Horizontal,
  PlotRange -> {{0, 0.028 * 1.0001}, {0.5, 4 + 0.5}},
  AspectRatio -> 1,
  Axes -> False,
  Frame -> True,
  FrameTicks -> {None, framey, framex, None},
  FrameLabel -> {None, None, None, None},
  GridLines -> {gridx, None},
  DisplayFunction -> Identity];
g = FullGraphics[g];
g[[1, 2]] = g[[1, 2]] /.
  Text[a_, {b_, c_}, {0., -1.}] ->
  Text[a, {b, c}, {0, -1}, {0, 1}];
g2 = Show[g,
  AspectRatio -> 1.3,
  PlotRange -> All,
  DisplayFunction -> Identity];
```



```

rfractions[[1]]

0.722771

gridx = Table[a, {a, 0, 0.75, 0.15}];
framex = Table[{gridx[[a]], gridx[[a]]}, {a, 1, 6}];
gridx = Table[{gridx[[a]], RGBColor[0, 0, 0]}, {a, 1, 6}];
framey = Table[{7 - a + 1, StringJoin[
  " ", ToString[rsubtensors[[a, 1]]],
  " ", ToString[rsubtensors[[a, 2]]],
  " ", ToString[rsubtensors[[a, 3]]]}],
  {a, 1, 7}];
labelx = ColumnForm[
  {"(a) Eigenexpression Fraction", StringJoin["d = ", ToString[entropy]], " "}, Center];
labely = ColumnForm[{"Subtensors", " "}, Center];
g = BarChart[
  Table[rfractions[[7 - a]], {a, 0, 7 - 1}],
  BarOrientation -> Horizontal,
  PlotRange -> {{0, 0.75 + 1.0001}, {0.5, 7 + 0.5}},
  AspectRatio -> 1,
  Axes -> False,
  Frame -> True,
  FrameTicks -> {None, framey, framex, None},
  FrameLabel -> {None, labely, labelx, " "},
  GridLines -> {gridx, None},
  DisplayFunction -> Identity];
g = FullGraphics[g];
g[[1, 2]] = g[[1, 2]] /.
  Text[labely, {b_, c_}, {1., 0.}] ->
  Text[labely, {b - 0.22, c}, {0, 0}, {0, 1}];
g[[1, 2]] = g[[1, 2]] /.
  Text[labelx, {b_, c_}, {0., -1.}] ->
  Text[labelx, {b, c + 1.3}, {0, -1}, {1, 0}];
g[[1, 2]] = g[[1, 2]] /.
  Text[a_, {b_, c_}, {0., -1.}] ->
  Text[a, {b, c}, {0, -1}, {0, 1}];
g1 = Show[{g,
  Graphics[{RGBColor[1, 1, 0.8], Rectangle[{0.1, 0.75}, {0.72, 6.35}]},
  Graphics[{Rectangle[{0.075, 0.75}, {0.72, 6.2}, g2}]}],
  AspectRatio -> 1.05,
  PlotRange -> All,
  DisplayFunction -> Identity];

```

(\* Create Selected x-Eigenenes Graph Display \*)

```
length = 0.035;
p = Table[0, {n, 1, 3}];
color = {RGBColor[1, 0, 0], RGBColor[0, 0, 1], RGBColor[0, 0.5, 0], RGBColor[1, 0.5, 0]};
labelx = ColumnForm[{"(b) x-Settings", Center];
labely = ColumnForm[{" ", "Expression Level", Center];
framex = Table[{a - 1, xarraynames[[a]]}, {a, 1, xarrays}];
framey = {-0.5, 0, 0.5};
Do[{
  coordinates = Table[{a - 1, xeigenenes[[n, a]]}, {a, 1, xarrays}],
  points = Table[Point[coordinates[[a]]], {a, 1, xarrays}],
  line = Line[coordinates],
  g = Show[
    {Graphics[{color[[n]], PointSize[0.022], points}],
    Graphics[{color[[n]], Thickness[0.0044], line}]},
    Frame -> True,
    FrameLabel -> {None, labely, labelx, None},
    FrameTicks -> {None, framey, framex, None},
    PlotRange -> {-0.75, 0.75},
    GridLines -> {{{5.5, RGBColor[0, 0, 0]}}, {{0, RGBColor[0, 0, 0]}},
    DisplayFunction -> Identity],
  g = FullGraphics[g],
  g[[1, 2]] = g[[1, 2]] /.
    Text[labely, {b_, c_}, {1., 0.}] ->
    Text[labely, {b - 2, c}, {0, 0}, {0, 1}],
  g[[1, 2]] = g[[1, 2]] /.
    Text[labelx, {b_, c_}, {0., -1.}] ->
    Text[labelx, {b, c + 0.5}, {0, -1}, {1, 0}],
  g[[1, 2]] = g[[1, 2]] /.
    Text[a_, {b_, c_}, {0., -1.}] ->
    Text[a, {b, c}, {0, -1}, {0, 1}],
  p[[n]] = Show[g,
    AspectRatio -> 1.05,
    PlotRange -> All,
    DisplayFunction -> Identity]],
{n, 1, 3}
g2 = Show[{
  cycle[0, 0.64, 0.74],
  arrows[-0.25, 5.5, 11.25, 1, 0.05],
  p[[3]], p[[2]], p[[1]],
  AspectRatio -> 1.05,
  PlotRange -> All,
  DisplayFunction -> Identity];
```

(\* Create Rotated y-Eigengenes Graph Display \*)

```

p = Table[0, {n, 1, 3}];
color = {RGBColor[1, 0, 0], RGBColor[0, 0, 1], RGBColor[0, 0.5, 0]};
labelx = ColumnForm[{"(c) y-Settings", Center];
labely = ColumnForm[{" ", " "}, Center];
framex = Table[{a - 1, yarraynames[[a]]}, {a, 1, yarrays};
framey = {-1, -0.5, 0, 0.5, 1};
Do[{
  coordinates = Table[{a - 1, yeigengenes[[n, a]]}, {a, 1, yarrays}],
  points = Table[Point[coordinates[[a]], {a, 1, yarrays}],
  line = Line[coordinates],
  g = Show[
    {Graphics[{color[[n]], PointSize[0.022], points}],
    Graphics[{color[[n]], Thickness[0.0044], line}]},
    Frame -> True,
    FrameLabel -> {None, labely, labelx, None},
    GridLines -> {None, {{0, RGBColor[0, 0, 0]}}},
    FrameTicks -> {None, framey, framex, None},
    PlotRange -> {-1.05, 1.05},
    DisplayFunction -> Identity],
  g = FullGraphics[g],
  g[[1, 2]] = g[[1, 2]] /.
    Text[labely, {b_, c_}, {1., 0.}] ->
    Text[labely, {b - 0.5, c}, {0, 0}, {0, 1}],
  g[[1, 2]] = g[[1, 2]] /.
    Text[labelx, {b_, c_}, {0., -1.}] ->
    Text[labelx, {b, c + 0.7}, {0, -1}, {1, 0}],
  g[[1, 2]] = g[[1, 2]] /.
    Text[a_, {b_, c_}, {0., -1.}] ->
    Text[a, {b, c}, {0, -1}, {0, 1}],
  p[[n]] = Show[g,
    AspectRatio -> 1.05,
    PlotRange -> All,
    DisplayFunction -> Identity]],
{n, 1, 3}
g3 = Show[{p[[3]], p[[2]], p[[1]]},
  DisplayFunction -> Identity];

```

(\* Display Fractions, Selected x-Eigengenes and Rotated y-Eigengenes \*)

```

Show[GraphicsArray[{g1, g2, g3}],
  GraphicsSpacing -> -0.1375];

```

(a) Eigenexpression Fraction  
d = 0.23

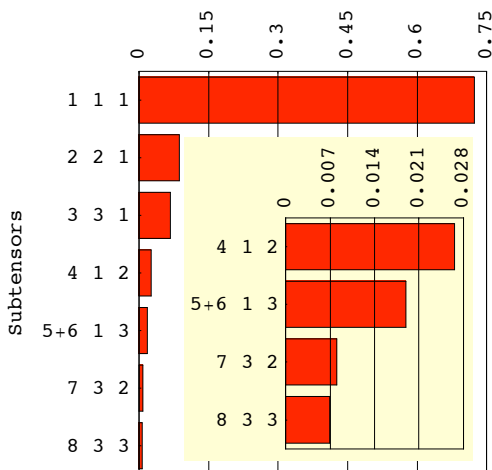

(b) x-Settings

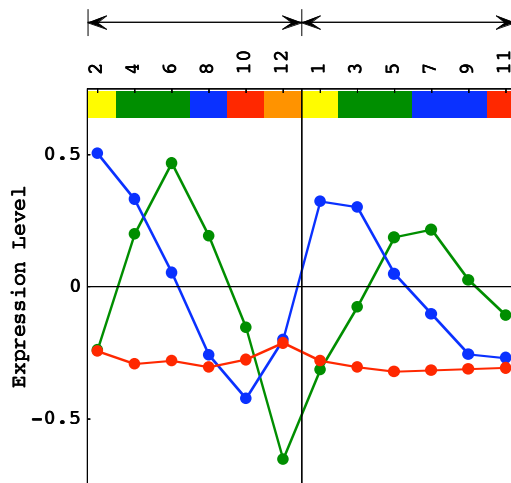

(c) y-Settings

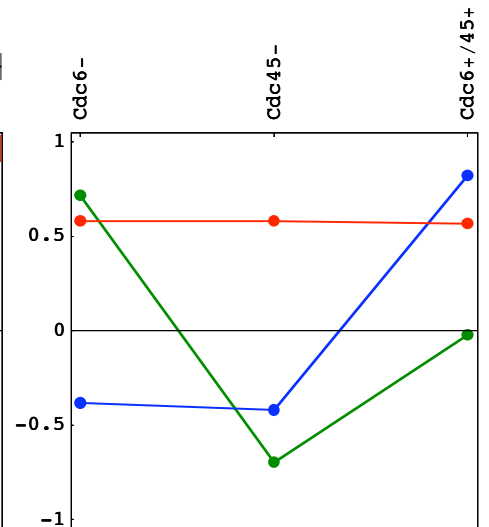

```
(* Associate Selected Eigenarrays and Superpositions of Eigenarrays *)
```

```
(* Read Gene and ARS Annotations *)
```

```
stream = "Desktop/96/Data/Gene_Annotations.txt";  
geneannotations = Import[stream, "Table"];  
geneannotationnames = geneannotations[[1]];  
geneannotations = Drop[geneannotations, {1}];  
Dimensions[geneannotations][[1]]  
Clear[stream];
```

```
4270
```

```
stream = "Desktop/96/Data/ARS_Annotations.txt";  
arsannotations = Import[stream, "Table"];  
arsannotations = Drop[arsannotations, {1}];  
arss = Dimensions[arsannotations][[1]]  
Clear[stream];
```

```
325
```

```
(* Annotate Genes with ARSs at Their 3' Ends *)
```

```
arsat3end = Table["", {genes}];  
Do[{  
  Do[arsat3end[[a]] = StringJoin[arsat3end[[a]], If[geneannotations[[a, 9]] == arsannotations[[b, 2]],  
    If[geneannotations[[a, 10]] < geneannotations[[a, 11]],  
    If[arsannotations[[b, 3]] - geneannotations[[a, 11]] < 100,  
    If[geneannotations[[a, 11]] < arsannotations[[b, 4]],  
    If[geneannotations[[a, 10]] < arsannotations[[b, 3]],  
    arsannotations[[b, 1]], "", "", "",  
    If[geneannotations[[a, 11]] - arsannotations[[b, 4]] < 100,  
    If[geneannotations[[a, 11]] > arsannotations[[b, 3]],  
    If[geneannotations[[a, 10]] > arsannotations[[b, 4]],  
    arsannotations[[b, 1]], "", "", "", ""],  
  {b, 1, arss}],  
  If[arsat3end[[a]] == "", arsat3end[[a]] = "None"],  
  {a, 1, genes}]
```

```
(* Annotate Genes with ARSs at Their 5' Ends *)
```

```
arsat5end = Table["", {genes}];  
Do[{  
  Do[arsat5end[[a]] = StringJoin[arsat5end[[a]], If[geneannotations[[a, 9]] == arsannotations[[b, 2]],  
    If[geneannotations[[a, 11]] < geneannotations[[a, 10]],  
      If[arsannotations[[b, 3]] - geneannotations[[a, 10]] < 100,  
        If[geneannotations[[a, 10]] < arsannotations[[b, 4]],  
          If[geneannotations[[a, 11]] < arsannotations[[b, 3]],  
            arsannotations[[b, 1]], "", "", "",  
          If[geneannotations[[a, 10]] - arsannotations[[b, 4]] < 100,  
            If[geneannotations[[a, 10]] > arsannotations[[b, 3]],  
              If[geneannotations[[a, 11]] > arsannotations[[b, 4]],  
                arsannotations[[b, 1]], "", "", "", ""], ""],  
        {b, 1, arss}],  
    If[arsat5end[[a]] == "", arsat5end[[a]] = "None"]},  
  {a, 1, genes}]
```

```
(* Annotate Genes that Overlap ARSs *)
```

```
arsoverlap = Table["", {genes}];  
Do[{  
  Do[arsoverlap[[a]] = StringJoin[arsoverlap[[a]],  
    If[geneannotations[[a, 9]] == arsannotations[[b, 2]],  
      If[geneannotations[[a, 10]] < geneannotations[[a, 11]],  
        If[arsannotations[[b, 3]] - geneannotations[[a, 10]] ≥ 0,  
          If[arsannotations[[b, 4]] - geneannotations[[a, 11]] ≤ 0,  
            arsannotations[[b, 1]], "",  
          If[arsannotations[[b, 4]] - geneannotations[[a, 11]] ≥ 0,  
            arsannotations[[b, 1]], "", ""],  
        If[arsannotations[[b, 3]] - geneannotations[[a, 11]] ≥ 0,  
          If[arsannotations[[b, 4]] - geneannotations[[a, 10]] ≤ 0,  
            arsannotations[[b, 1]], "",  
          If[arsannotations[[b, 4]] - geneannotations[[a, 10]] ≥ 0,  
            arsannotations[[b, 1]], "",  
          ""],  
        ], ""}],  
    {b, 1, arss}],  
  If[arsoverlap[[a]] == "", arsoverlap[[a]] = "None"]},  
  {a, 1, genes}]
```

```
(* Save ARS Annotations *)
```

```
ars = AppendColumns[  
  {"ARS_at_3'<100", "ARS_at_5'<100", "Overlaps_ARS"},  
  Transpose[AppendRows[{arsat3end, arsat5end, arsoverlap}]]];
```

```
(* Annotate Genes Significant in Superpositions of Subtensors *)
```

```
zeigenarray[z1_, z2_, x_, y_] := (  
  signs[[r[z1, x, y]]] * Sqrt[fractions[[r[z1, x, y]]]] * TakeColumns[zeigenarrays, {z1}] +  
  signs[[r[z2, x, y]]] * Sqrt[fractions[[r[z2, x, y]]]] * TakeColumns[zeigenarrays, {z2}]  
  ) / Sqrt[fractions[[r[z1, x, y]]] + fractions[[r[z2, x, y]]]];  
rzeigenarrays = AppendRows[  
  TakeColumns[zeigenarrays, {1, 4}],  
  zeigenarray[5, 6, 1, 3],  
  TakeColumns[zeigenarrays, {7, 8}]]];
```

```
(* Annotate Genes Underexpressed in the 4th Subtensor, Overexpressed in the 5th and 6th *)
```

```
intersection456 = N[Round[Sqrt[  
  rfractions[[4]] * TakeColumns[rzeigenarrays, {4}]^2 +  
  rfractions[[5]] * TakeColumns[rzeigenarrays, {5}]^2 +  
  rfractions[[6]] * TakeColumns[rzeigenarrays, {6}]^2 * 100000] / 100000];  
Do[intersection456[[a]] =  
  If[rzeigenarrays[[a, 4]] < 0.007,  
    If[rzeigenarrays[[a, 5]] > -0.007,  
      If[rzeigenarrays[[a, 6]] > -0.007, intersection456[[a]],  
        {"N"}], {"N"}], {"N"}], {a, 1, zgenes}]
```

```
(* Annotate Genes Overexpressed in the 4th Subtensor, Underexpressed in the 6th and 7th *)
```

```
intersection457 = N[Round[Sqrt[  
  rfractions[[4]] * TakeColumns[rzeigenarrays, {4}]^2 +  
  rfractions[[5]] * TakeColumns[rzeigenarrays, {5}]^2 +  
  rfractions[[7]] * TakeColumns[rzeigenarrays, {7}]^2 * 100000] / 100000];  
Do[intersection457[[a]] =  
  If[rzeigenarrays[[a, 4]] > -0.007,  
    If[rzeigenarrays[[a, 5]] < 0.007,  
      If[rzeigenarrays[[a, 7]] < 0.007, intersection457[[a]],  
        {"N"}], {"N"}], {"N"}], {a, 1, zgenes}]
```

```
(* Save Significance in Subtensor Superpositions Annotations *)
```

```
intersection = AppendColumns[  
  {"Histone_Enriched", "ARS_at_3'_Enriched"},  
  AppendRows[intersection456, intersection457]]];
```

```
(* Save Annotations with Selected Eigenarrays and Superpositions of Eigenarrays *)
```

```
geneannotations = AppendColumns[{geneannotationnames}, geneannotations];  
geneannotations = AppendRows[  
  TakeColumns[geneannotations, {1, 8}],  
  ars,  
  TakeColumns[geneannotations, {9, 15}],  
  AppendRows[geneannotations,  
    AppendColumns[{"1", "2", "3", "4", "5+6", "7", "8"}],  
    N[Round[rzeigenarrays * 100000] / 100000]],  
  intersection];
```

```
stream = OpenWrite[  
  "Desktop/96/Data/Eigenarrays.txt",  
  PageWidth -> Infinity];  
Write[stream, OutputForm[TableForm[  
  geneannotations,  
  TableSpacing -> {0, 1}]]];  
Close[stream];
```

```
(* Display Sorted Selected Eigenarrays and Superpositions of Eigenarrays *)
```

```
(* Center, Normalize and Sort Selected Eigenarrays and Superpositions of Eigenarrays *)
```

```
arraypatterns = Transpose[rzeigenarrays];  
arraypatternnames = {"1", "2", "3", "4", "5+6", "7", "8"};  
dimensions = Dimensions[arraypatterns][[1]]
```

```
7
```

```
average = Table[1, {a, 1, zgenes}];  
average = N[average / Sqrt[Dot[average, average]]];  
arraypatterns = arraypatterns - N[Outer[Times, Dot[arraypatterns, average], average]];  
Do[arraypatterns[[a]] = arraypatterns[[a]] / Sqrt[Dot[arraypatterns[[a]], arraypatterns[[a]]],  
  {a, 1, dimensions}]  
Do[arraypatterns[[a]] = Sort[arraypatterns[[a]], OrderedQ[{{#2}, {#1}}] &],  
  {a, 1, dimensions}]
```

```
(* Create Sorted Selected Eigenarrays and Superpositions of Eigenarrays Display *)
```

```
p = Table[0, {a, 1, dimensions}];  
color = {  
  RGBColor[0.75, 0, 1],  
  RGBColor[1, 0, 0],  
  RGBColor[1, 0.5, 0],  
  RGBColor[0, 0.5, 0],  
  RGBColor[0, 0, 1]};  
labelx = "Expression Level";  
labeledy = "Number of Genes";  
framex = Table[{0.05 * a, arraypatternnames[[a]]},  
  {a, 1, dimensions}];  
framey = {{-200, "200"}, {-2000, "2000"}, {-zgenes + 200, "4070"}};  
Do[{  
  coordinates = Table[  
    If[arraypatterns[[n, a]] + 0.05 * n < -0.025, -0.025,  
      If[arraypatterns[[n, a]] + 0.05 * n > 0.425, 0.425,  
        arraypatterns[[n, a]] + 0.05 * n],  
    {a, 1, zgenes}],  
  coordinates = Table[{coordinates[[a]], -a + 1}, {a, 1, zgenes}],  
  line = Line[coordinates],  
  g = Show[  
    Graphics[{color[[Mod[n, 5] + 1]], line}],  
    Frame -> True,  
    FrameLabel -> {None, labeledy, labelx, None},  
    FrameTicks -> {None, framey, framex, None},  
    GridLines -> {{{0.05 * n, RGBColor[0, 0, 0]}}, {{-200, RGBColor[0, 0, 0]},  
      {-2000, RGBColor[0, 0, 0]}, {-zgenes + 200, RGBColor[0, 0, 0]}}},  
    PlotRange -> {{-0.025, 0.425}, {200, -zgenes + 1 - 200}},  
    DisplayFunction -> Identity],  
  g = FullGraphics[g],  
  g[[1, 2]] = g[[1, 2]] /.  
    Text[labeledy, {b_, c_}, {1., 0.}] ->  
    Text[labeledy, {b - 0.032, c}, {0, 0}, {0, 1}],  
  g[[1, 2]] = g[[1, 2]] /.  
    Text[labelx, {b_, c_}, {0., -1.}] ->  
    Text[labelx, {b, c + 420}, {0, -1}, {1, 0}],  
  g[[1, 2]] = g[[1, 2]] /.  
    Text[a_, {b_, c_}, {0., -1.}] ->  
    Text[a, {b, c}, {0, -1}, {0, 1}],  
  p[[n]] = Show[g,  
    AspectRatio -> 1 / GoldenRatio,  
    PlotRange -> All,  
    DisplayFunction -> Identity]  
}, {n, 1, dimensions}];
```

(\* Display Sorted Selected Eigenarrays and Superpositions of Eigenarrays \*)

```
Show[Table[p[[a]], {a, 1, dimensions}],  
DisplayFunction -> $DisplayFunction];
```

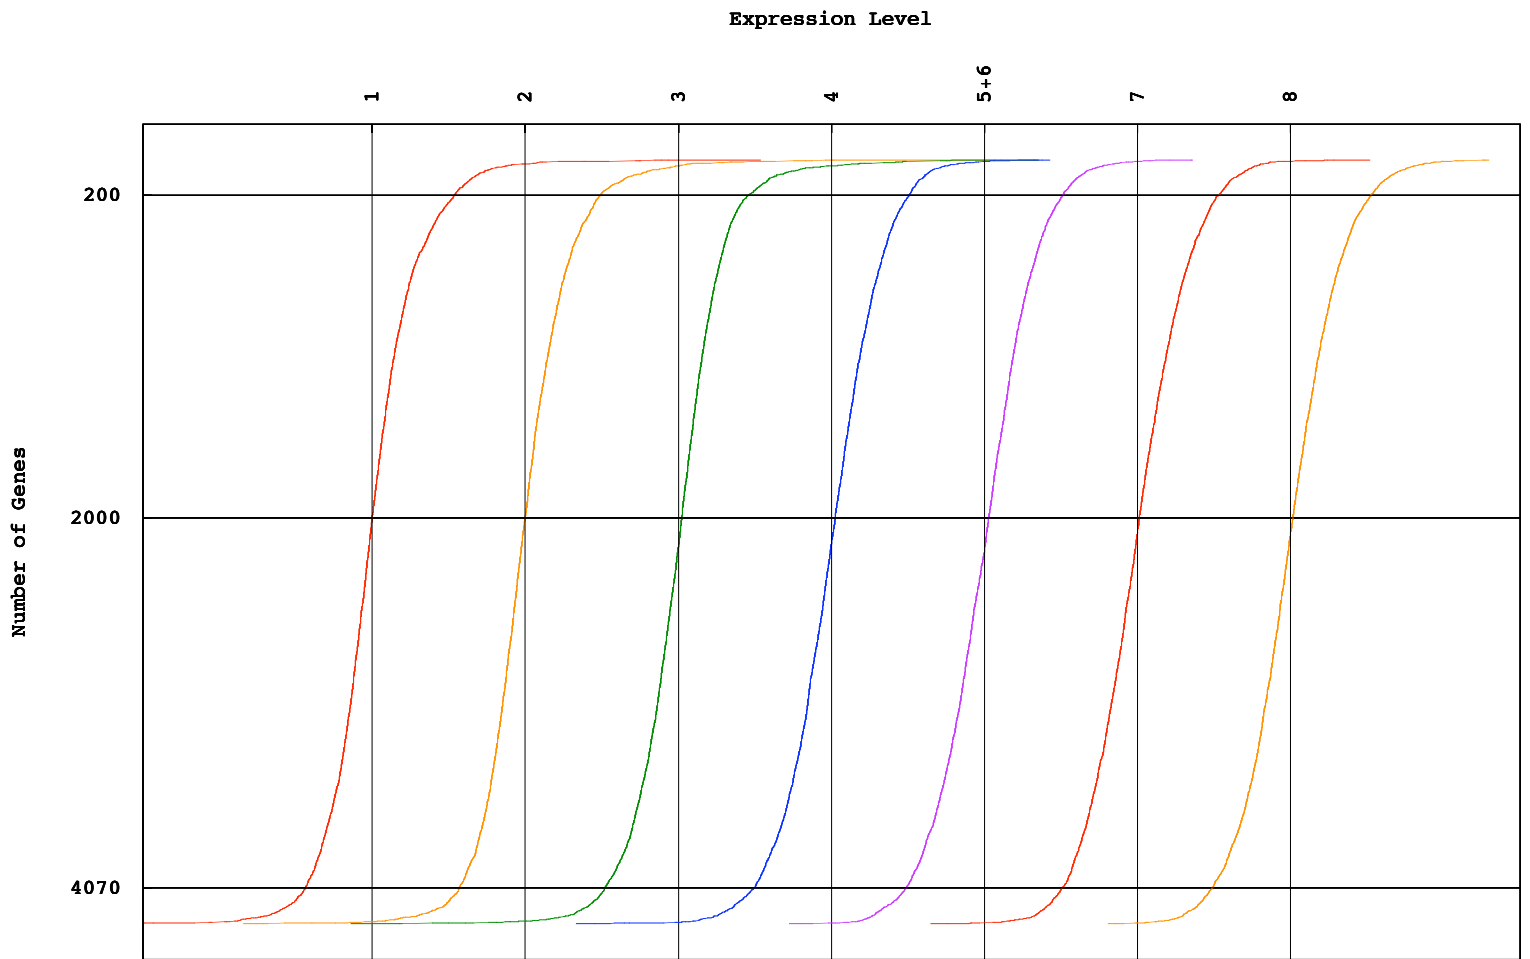



```
(* Sort Time Points and Genes in the Common Cell Cycle Subtensor Space *)
```

```
(* Create Parametric Plot of HOSVD-Sorted Time Points *)
```

```
x = 2;
y = 3;
coordinate[z_] := xeigenenes[[z]];
phase = ArcTan[coordinate[y] / coordinate[x]] +
  (Sign[coordinate[x]] + Table[{1}, {a, 1, xarrays}]) * Pi / 2.;
radius = Flatten[Sqrt[(coordinate[y]^2 + coordinate[x]^2) /
  Sum[coordinate[a]^2, {a, 1, 3}]]];
xcoordinate = Flatten[-radius * Cos[phase]];
ycoordinate = Flatten[-radius * Sin[phase]];
points = Table[Point[{xcoordinate[[a]], ycoordinate[[a]]}], {a, 1, xarrays}];
textcorrections = 0.1 * {{-1, 0}, {1, 0}, {1, 0}, {-1, 0}, {-0.75, 1}, {-0.75, 1},
  {-1, 0}, {-1, 0}, {0, 1}, {-1, 0}, {-0.75, 0.75}, {0.75, -1}};
texts = Table[Text[xarraynames[[a]], {xcoordinate[[a]], ycoordinate[[a]]} +
  textcorrections[[a]], {a, 1, xarrays}];

p = Show[{
  Graphics[{RGBColor[1, 1, 0], PointSize[0.035],
    points[[1]], points[[7]]}],
  Graphics[{RGBColor[0, 0.5, 0], PointSize[0.035],
    points[[2]], points[[3]], points[[8]], points[[9]]}],
  Graphics[{RGBColor[1, 0, 0], PointSize[0.035],
    points[[5]], points[[12]]}],
  Graphics[{RGBColor[0, 0, 1], PointSize[0.035],
    points[[4]], points[[10]], points[[11]]}],
  Graphics[{RGBColor[1, 0.5, 0], PointSize[0.035], points[[6]]}],
  Graphics[{RGBColor[1, 0.5, 0], Text["G2/M", {-0.2, -1.12}]}],
  Graphics[{RGBColor[0, 0, 0], Text["M/G1", {0.9, -0.75}]}],
  Graphics[{RGBColor[0, 0.5, 0], Text["G1", {0.8, 0.8}]}],
  Graphics[{RGBColor[0, 0, 1], Text["S", {-0.4, 1}]}],
  Graphics[{RGBColor[1, 0, 0], Text["S/G2", {-1.1, -0.36}]}],
  Graphics[texts],
  Graphics[{RGBColor[0, 0, 0], Text["(a)", {-1.1, 1.15}]}],
  Graphics[{RGBColor[0, 0, 0], Text[" $\theta = \pi/2$ ", {0.2, 1.12}]}],
  Graphics[{RGBColor[0, 0, 0], Text[" $\theta = 0$ ", {1.12, -0.12}]}],
  Graphics[{RGBColor[0, 0, 0], Dashing[{0.03, 0.02}], Circle[{0, 0}, 0.5]}],
  Graphics[{RGBColor[0, 0, 0], Dashing[{0.03, 0.02}], Circle[{0, 0}, 1]}],
  Graphics[{RGBColor[0, 0, 0], Arrow[{-1.25, 0}, {1.25, 0},
    HeadCenter -> 0.5, HeadLength -> 0.035, HeadWidth -> 0.75]}],
  Graphics[{RGBColor[0, 0, 0], Arrow[{0, -1.25}, {0, 1.25},
    HeadCenter -> 0.5, HeadLength -> 0.035, HeadWidth -> 0.75]}],
  AspectRatio -> 1,
  PlotRange -> {{-1.25, 1.25}, {-1.25, 1.25}},
  Frame -> True,
  FrameTicks -> False,
  FrameLabel -> {None, None, None, None},
  GridLines -> {None, None},
  DisplayFunction -> Identity];
p = FullGraphics[p];
p[[1, 2]] = p[[1, 2]] /.
  Text[labely, {b_, c_}, {1., 0.}] ->
  Text[labely, {-1.18, 0}, {0, 0}, {0, 1}];
s1 = Show[p,
  AspectRatio -> 1.0,
  PlotRange -> All,
  DisplayFunction -> Identity];
```

```
(* Create Parameteric Plot of HOSVD-Sorted Cell Cycle-Regulated Genes *)
```

```
x = 2;  
y = 3;  
coordinate[z_] := TakeColumns[zeigenarrays, {z}]; phase = ArcTan[coordinate[y] / coordinate[x]] +  
  (Sign[rfractions[[x]] * coordinate[x] + Table[{1}, {a, 1, zgenes}]] * Pi / 2.;  
radius = Flatten[Sqrt[coordinate[y]^2 + coordinate[x]^2] /  
  Sqrt[Sum[coordinate[a]^2, {a, 1, 3}]]];  
xcoordinate = Flatten[-radius * Cos[phase]];  
ycoordinate = Flatten[-radius * Sin[phase]];
```

```
points = Table[0, {5}];  
radii = Table[0, {5}];  
stages = {"M/G1", "G1", "S", "S/G2", "G2/M"};  
Do[{  
  position = Flatten[Position[Drop[Transpose[geneannotations][[7]], 1], stages[[a]]],  
  points[[a]] = Table[Point[{xcoordinate[[position[[b]]], ycoordinate[[position[[b]]]}],  
    {b, 1, Dimensions[position][[1]]}],  
  radii[[a]] = Table[radius[[position[[b]]], {b, 1, Dimensions[position][[1]]}],  
    {a, 1, 5}]  
Dimensions[Flatten[points]][[1]]  
Position[Table[If[Sort[Flatten[radii], OrderedQ[{{#2}, {#1}]] &][[b]] < 0.5, 0, 1],  
  {b, 1, Dimensions[Flatten[radii]][[1]]}], 0][[1, 1]] - 1
```

```
576
```

```
528
```

```
Do[Print[Dimensions[points[[a]][[1]]], {a, 1, 5}]
```

```
84
```

```
211
```

```
52
```

```
88
```

```
141
```

```
(* 576 cell cycle genes: 84 in M/G1, 211 in G1, 52 in S, 88 in S/G2, 141 in G2/M. *)
```

```
Do[Print[Position[Table[If[Sort[radii[[a]], OrderedQ[{{#2}, {#1}]] &][[b]] < 0.5, 0, 1],  
  {b, 1, Dimensions[radii[[a]][[1]]}], 0][[1, 1]] - 1], {a, 1, 5}]
```

```
73
```

```
201
```

```
48
```

```
75
```

```
131
```

```
(* 528 genes with at least 25 % of normalized expression in the cell cycle subspace: *)
```

```
(* 73 in M/G1, 201 in G1, 48 in S, 75 in S/G2, 131 in G2/M. *)
```

```

p = Show[{
  Graphics[{RGBColor[1, 0.5, 0], PointSize[0.02], points[[5]]}],
  Graphics[{RGBColor[1, 1, 0], PointSize[0.02], points[[1]]}],
  Graphics[{RGBColor[0, 0.5, 0], PointSize[0.02], points[[2]]}],
  Graphics[{RGBColor[0, 0, 1], PointSize[0.02], points[[3]]}],
  Graphics[{RGBColor[1, 0, 0], PointSize[0.02], points[[4]]}],
  Graphics[{RGBColor[1, 0.5, 0], Text["G2/M", {-0.2, -1.12}]}],
  Graphics[{RGBColor[0, 0, 0], Text["M/G1", {0.9, -0.75}]}],
  Graphics[{RGBColor[0, 0.5, 0], Text["G1", {0.8, 0.8}]}],
  Graphics[{RGBColor[0, 0, 1], Text["S", {-0.4, 1}]}],
  Graphics[{RGBColor[1, 0, 0], Text["S/G2", {-1.1, -0.36}]}],
  Graphics[{RGBColor[0, 0, 0], Text["(b)", {-1.1, 1.15}]}],
  Graphics[{RGBColor[0, 0, 0], Text[" $\theta=\pi/2$ ", {0.2, 1.12}]}],
  Graphics[{RGBColor[0, 0, 0], Text[" $\theta=0$ ", {1.12, -0.12}]}],
  Graphics[{RGBColor[0, 0, 0], Dashing[{0.03, 0.02}], Circle[{0, 0}, 0.5]}],
  Graphics[{RGBColor[0, 0, 0], Dashing[{0.03, 0.02}], Circle[{0, 0}, 1]}],
  Graphics[{RGBColor[0, 0, 0], Arrow[{-1.25, 0}, {1.25, 0},
    HeadCenter -> 0.5, HeadLength -> 0.035, HeadWidth -> 0.75]}],
  Graphics[{RGBColor[0, 0, 0], Arrow[{0, -1.25}, {0, 1.25},
    HeadCenter -> 0.5, HeadLength -> 0.035, HeadWidth -> 0.75]}]},
  AspectRatio -> 1,
  PlotRange -> {{-1.25, 1.25}, {-1.25, 1.25}},
  Frame -> True,
  FrameTicks -> False,
  FrameLabel -> {None, None, None, None},
  GridLines -> {None, None},
  DisplayFunction -> Identity];
p = FullGraphics[p];
p[[1, 2]] = p[[1, 2]] /.
  Text[label_, {b_, c_}, {1., 0.}] ->
  Text[label_, {-1.18, 0}, {0, 0}, {0, 1}];
s2 = Show[p,
  AspectRatio -> 1.0,
  PlotRange -> All,
  DisplayFunction -> Identity];

(* Create Schematic Plot of HOSVD Cell Cycle 2 D Subspace *)

R[theta_] = {{Cos[theta], Sin[theta]}, {-Sin[theta], Cos[theta]}};
x = Transpose[{{0.4, 0}, {1.1, 0}, {0.75, 0.25}}];
polypoints[theta_] = Transpose[Dot[R[theta], x]];

```

```

p = Show[{
  Graphics[{RGBColor[1, 0.5, 0], Text["G2/M", {-0.2, -1.12}]}],
  Graphics[{RGBColor[0, 0, 0], Text["M/G1", {0.9, -0.75}]}],
  Graphics[{RGBColor[0, 0.5, 0], Text["G1", {0.8, 0.8}]}],
  Graphics[{RGBColor[0, 0, 1], Text["S", {-0.4, 1}]}],
  Graphics[{RGBColor[1, 0, 0], Text["S/G2", {-1.1, -0.36}]}],
  Graphics[{RGBColor[0, 0, 0], Text["(c)", {-1.1, 1.15}]}],
  Graphics[{RGBColor[0, 0, 0], Text[" $\theta=\pi/2$ ", {0.2, 1.12}]}],
  Graphics[{RGBColor[0, 0, 0], Text[" $\theta=0$ ", {1.12, -0.12}]}],
  Graphics[{RGBColor[1, 0.5, 0], Disk[{0, 0}, 1, {-5 * Pi / 6, -Pi / 2}]}],
  Graphics[{RGBColor[1, 1, 0], Disk[{0, 0}, 1, {-Pi / 2, 0}]}],
  Graphics[{RGBColor[0, 0.5, 0], Disk[{0, 0}, 1, {0, Pi / 2}]}],
  Graphics[{RGBColor[0, 0, 1], Disk[{0, 0}, 1, {Pi / 2, 5 * Pi / 6}]}],
  Graphics[{RGBColor[1, 0, 0], Disk[{0, 0}, 1, {5 * Pi / 6, 7 * Pi / 6}]}],
  Graphics[{RGBColor[1, 1, 1], Disk[{0, 0}, 0.5]}],
  Graphics[{RGBColor[1, 0.5, 0], Polygon[polypoints[Pi / 2]}],
  Graphics[{RGBColor[1, 1, 0], Polygon[polypoints[0]}],
  Graphics[{RGBColor[0, 0.5, 0], Polygon[polypoints[3 * Pi / 2]}],
  Graphics[{RGBColor[0, 0, 0], Arrow[{-1.25, 0}, {1.25, 0},
    HeadCenter -> 0.5, HeadLength -> 0.035, HeadWidth -> 0.75]}],
  Graphics[{RGBColor[0, 0, 0], Arrow[{0, -1.25}, {0, 1.25},
    HeadCenter -> 0.5, HeadLength -> 0.035, HeadWidth -> 0.75]}],
  AspectRatio -> 1,
  PlotRange -> {{-1.25, 1.25}, {-1.25, 1.25}},
  Frame -> True,
  FrameTicks -> False,
  FrameLabel -> {None, None, None, None},
  GridLines -> {{{0, RGBColor[0, 0, 0]}}, {{0, RGBColor[0, 0, 0]}},
  DisplayFunction -> Identity];
p = FullGraphics[p];
p[[1, 2]] = p[[1, 2]] /.
  Text[labely, {b_, c_}, {1., 0.}] ->
  Text[labely, {-1.18, 0}, {0, 0}, {0, 1}];
s3 = Show[p,
  AspectRatio -> 1.,
  PlotRange -> All,
  DisplayFunction -> Identity];
Clear[x];

```

(\* Display HOSVD-Sorted Time Points and Genes in the Common Cell Cycle Subtensor Space \*)

```

Show[GraphicsArray[{s1, s2, s3}],
  GraphicsSpacing -> 0];

```

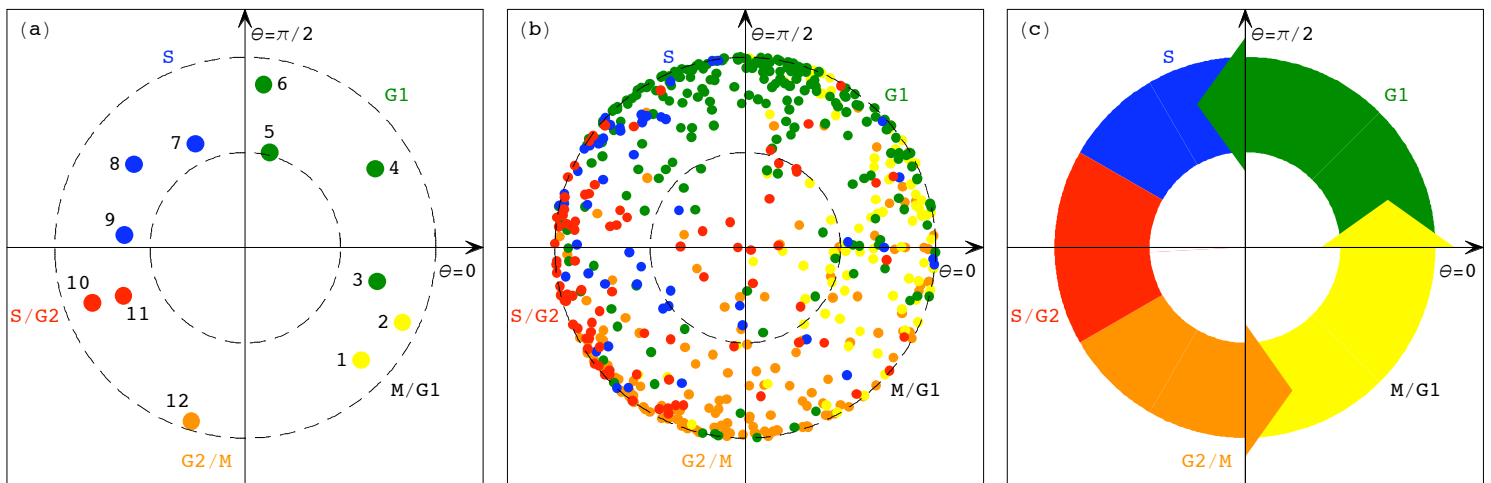

(\* Display Selected Genes \*)

(\* Create Selected Genes Raster Displays \*)

```
contrast = 1 / (Log[2, 2] / product1 / product2);
genelist1 =
  {"YDR225W", "HTA1"},
  {"YBLO03C", "HTA2"},
  {"YDR224C", "HTB1"},
  {"YBLO02W", "HTB2"},
  {"YBRO09C", "HHF1"},
  {"YNLO30W", "HHF2"},
  {"YBRO10W", "HHT1"},
  {"YNLO31C", "HHT2"},
  {"YPL127C", "HHO1"};
dimension1 = Dimensions[genelist1][[1]];
genelist1 = Table[genelist1[[n]], {n, dimension1, 1, -1}];
color1 = Table[0, {a, 1, dimension1}];
Do[{gene = Transpose[tensor, {2, 1, 3}][[Position[genenames, genelist1[[n, 1]]][[1, 1]]]],
  average = Sum[Flatten[gene][[a]], {a, 1, yarrays * xarrays}] / yarrays / xarrays,
  gene = gene - Table[average, {yarrays}, {xarrays}],
  displaying = Table[If[contrast * gene[[i, j]] > 0,
    If[contrast * gene[[i, j]] < 1, {contrast * gene[[i, j]], 0}, {1, 0}],
    If[contrast * gene[[i, j]] > -1, {0, -contrast * gene[[i, j]]}, {0, 1}],
    {i, yarrays, 1, -1}, {j, 1, xarrays}],
  color1[[n]] = Table[RGBColor[displaying[[i, j, 1]], displaying[[i, j, 2]], 0],
    {i, 1, yarrays}, {j, 1, xarrays}],
  {n, 1, dimension1}]
```

```
contrast = 1 / (Log[2, 1.4] / product1 / product2);
genelist2 =
  {"YLR080W", "EMP46", "ARS1212"},
  {"YML119W", "YML119W", "ARS1303"},
  {"YCLO49C", "YCLO49C", "ARS305"},
  {"YAL068C", "PAU8", "ARS102"},
  {"YBR296C", "PHO89", "ARS228.5"},
  {"YBRO70C", "ALG14", "ARS212"},
  {"YGR243W", "FMP43", "ARS733"},
  {"YLR383W", "SMC6", "ARS1227.5"},
  {"YFRO30W", "MET10", "ARS608"},
  {"YGL229C", "SAP4", "ARS702"},
  {"YIL108W", "YIL108W", "ARS911.5"},
  {"YELO31W", "SPF1", "ARS508"},
  {"YMR300C", "ADE4", "ARS1331.5"},
  {"YAL002W", "VPS8", "ARS108"},
  {"YBR228W", "SLX1", "ARS221.5"},
  {"YJLO76W", "NET1", "ARS1010"};
dimension2 = Dimensions[genelist2][[1]];
genelist2 = Table[genelist2[[n]], {n, dimension2, 1, -1}];
color2 = Table[0, {a, 1, dimension2}];
Do[{gene = Transpose[tensor, {2, 1, 3}][[Position[genenames, genelist2[[n, 1]]][[1, 1]]]],
  average = Sum[Flatten[gene][[a]], {a, 1, yarrays * xarrays}] / yarrays / xarrays,
  gene = gene - Table[average, {yarrays}, {xarrays}],
  displaying = Table[
    If[contrast * gene[[i, j]] > 0,
      If[contrast * gene[[i, j]] < 1, {contrast * gene[[i, j]], 0}, {1, 0}],
      If[contrast * gene[[i, j]] > -1, {0, -contrast * gene[[i, j]]}, {0, 1}],
      {i, yarrays, 1, -1}, {j, 1, xarrays}],
  color2[[n]] = Table[
    RGBColor[displaying[[i, j, 1]], displaying[[i, j, 2]], 0],
    {i, 1, yarrays}, {j, 1, xarrays}],
  {n, 1, dimension2}]
```

```

length = 0.0125;
colorscale = Table[
  If[k > 60, RGBColor[(k - 60) / 60, 0, 0], RGBColor[0, (60 - k) / 60, 0]],
  {j, 1, 1}, {k, 1, 120}];
legend1 = {
  Graphics[RasterArray[colorScale, {{0, 5 + 4 * 7}, {12, 6 + 4 * 7}}]],
  Graphics[Line[{{0, 5 + 4 * 7}, {0, 6 + 4 * 7}, {12, 6 + 4 * 7}, {12, 5 + 4 * 7}, {0, 5 + 4 * 7}}]],
  Graphics[Line[{{-6 + 6, 5 + 4 * 7}, {-6 + 6, 4.65 + 4 * 7}}]],
  Graphics[Line[{{Log[2, 1 / 1.5] * 6 + 6, 5 + 4 * 7}, {Log[2, 1 / 1.5] * 6 + 6, 4.65 + 4 * 7}}]],
  Graphics[Line[{{6, 5 + 4 * 7}, {6, 4.65 + 4 * 7}}]],
  Graphics[Line[{{Log[2, 1.5] * 6 + 6, 5 + 4 * 7}, {Log[2, 1.5] * 6 + 6, 4.65 + 4 * 7}}]],
  Graphics[Line[{{6 + 6, 5 + 4 * 7}, {6 + 6, 4.65 + 4 * 7}}]],
  Graphics[Text[StyleForm["2-1", FontSize -> 12], {-6 + 6, 4.45 + 4 * 7}, {0, 1}, {1, 0}]],
  Graphics[Text[StyleForm["1.5-1", FontSize -> 12], {Log[2, 1 / 1.5] * 6 + 6, 4.45 + 4 * 7}, {0, 1}, {1, 0}]],
  Graphics[Text[StyleForm["1 ", FontSize -> 12], {6, 4.45 + 4 * 7}, {0, 1}, {1, 0}]],
  Graphics[Text[StyleForm["1.5 ", FontSize -> 12], {Log[2, 1.5] * 6 + 6, 4.45 + 4 * 7}, {0, 1}, {1, 0}]],
  Graphics[Text[StyleForm["2 ", FontSize -> 12], {6 + 6, 4.45 + 4 * 7}, {0, 1}, {1, 0}]],
  Graphics[Text["Fold Change vs. Mean", {6.25, 2.5 + 4 * 7}]];
genes1 = {
  Table[Graphics[RasterArray[color1[[n - 7]], {{0, 3 + 4 * n}, {12, 6 + 4 * n}}]], {n, 1 + 7, dimension1 + 7}],
  Table[Graphics[{{RGBColor[1, 1, 1], Thickness[0.0033], Line[{{6, 3 + 4 * n}, {6, 6 + 4 * n}}]}],
    {n, 1 + 7, dimension1 + 7}],
  Table[Graphics[Line[{{0, 3 + 4 * n}, {0, 6 + 4 * n}, {12, 6 + 4 * n}, {12, 3 + 4 * n}, {0, 3 + 4 * n}}]],
    {n, 1 + 7, dimension1 + 7}],
  Table[Graphics[Line[{{0, 6.5 + 4 * n - a}, {-0.2, 6.5 + 4 * n - a}}]],
    {a, 1, yarrays}, {n, 1 + 7, dimension1 + 7}],
  Table[Graphics[Text[yarraynames[[a]], {-0.5, 6.5 + 4 * n - a}, {1, 0}]],
    {a, 1, yarrays}, {n, 1 + 7, dimension1 + 7}],
  Table[Graphics[Line[{{12, 6 + 4 * n}, {13, 5 + 4 * n}}]], {n, 1 + 7, dimension1 + 7}],
  Table[Graphics[Text[StyleForm[genelist1[[n - 7, 2]], FontSize -> 12], {13, 4.5 + 4 * n}, {-1, 0}]],
    {n, 1 + 7, dimension1 + 7}],
  Table[Graphics[Line[{{a - 0.5, 6 + 4 * dimension2}, {a - 0.5, 6.3 + 4 * dimension2}}]], {a, 1, xarrays}],
  Table[Graphics[Text[xarraynames[[a]], {a - 0.5, 6.4 + 4 * dimension2}, {0, -1}, {0, 1}]],
    {a, 1, xarrays}],
  Graphics[Text["(a) x-Settings", {6.25, 10 + 4 * dimension2}],
  arrows[0, 6, 12, 8.5 + 4 * dimension2, 0.5],
  Graphics[Text["y-Settings", {-5.5, 53.5}, {0, -1}, {0, 1}]];

```

```

legend2 = {
  Graphics[RasterArray[colorscale, {{22, 5}, {34, 6}}]],
  Graphics[Line[{{22, 5}, {22, 6}, {34, 6}, {34, 5}, {22, 5 + 4*0}}]],
  Graphics[Line[{{-6 + 28, 5}, {-6 + 28, 4.65}}]],
  Graphics[Line[{{Log[2, 1/1.2] * 6 / Log[2, 1.4] + 28, 5}, {Log[2, 1/1.2] * 6 / Log[2, 1.4] + 28, 4.65}}]],
  Graphics[Line[{{28, 5}, {28, 4.65}}]],
  Graphics[Line[{{Log[2, 1.2] * 6 / Log[2, 1.4] + 28, 5}, {Log[2, 1.2] * 6 / Log[2, 1.4] + 28, 4.65}}]],
  Graphics[Line[{{6 + 28, 5}, {6 + 28, 4.65}}]],
  Graphics[Text[StyleForm["1.4-1", FontSize -> 12], {-6 + 28, 4.45}, {0, 1}, {1, 0}]],
  Graphics[Text[StyleForm["1.2-1", FontSize -> 12],
  {Log[2, 1/1.2] * 6 / Log[2, 1.4] + 28, 4.45}, {0, 1}, {1, 0}]],
  Graphics[Text[StyleForm["1 ", FontSize -> 12], {28, 4.45}, {0, 1}, {1, 0}]],
  Graphics[Text[StyleForm["1.2 ", FontSize -> 12],
  {Log[2, 1.2] * 6 / Log[2, 1.4] + 28, 4.45}, {0, 1}, {1, 0}]],
  Graphics[Text[StyleForm["1.4 ", FontSize -> 12], {6 + 28, 4.45}, {0, 1}, {1, 0}]],
  Graphics[Text["Fold Change vs. Mean", {28.25, 2.5}]];
genes2 = {
  Table[Graphics[RasterArray[color2[[n]], {{22, 3 + 4*n}, {34, 6 + 4*n}}]], {n, 1, dimension2}],
  Table[Graphics[{RGBColor[1, 1, 1], Thickness[0.0033], Line[{{28, 3 + 4*n}, {28, 6 + 4*n}}]],
  {n, 1, dimension2}],
  Table[Graphics[Line[{{22, 3 + 4*n}, {22, 6 + 4*n}, {34, 6 + 4*n}, {34, 3 + 4*n}, {22, 3 + 4*n}}]],
  {n, 1, dimension2}],
  Table[Graphics[Line[{{22, 6.5 + 4*n - a}, {21.8, 6.5 + 4*n - a}}]],
  {a, 1, yarrays}, {n, 1, dimension2}],
  Table[Graphics[Text[yarraynames[[a]], {21.5, 6.5 + 4*n - a}, {1, 0}]],
  {a, 1, yarrays}, {n, 1, dimension2}],
  Table[Graphics[Line[{{34, 6 + 4*n}, {35, 5 + 4*n}}]], {n, 1, dimension2}],
  Table[Graphics[Text[StyleForm[
  ColumnForm[" ", genelists2[[n, 2]], genelists2[[n, 3]], Left],
  FontSize -> 12], {35, 4.5 + 4*n}, {-1, 0}], {n, 1, dimension2}],
  Table[Graphics[Line[{{a + 21.5, 6 + 4*dimension2}, {a + 21.5, 6.3 + 4*dimension2}}]],
  {a, 1, xarrays}],
  Table[Graphics[Text[xarraynames[[a]], {a + 21.5, 6.4 + 4*dimension2}, {0, -1}, {0, 1}],
  {a, 1, xarrays}],
  Graphics[Text["(b) x-Settings", {28.25, 10 + 4*dimension2}],
  arrows[22, 28, 34, 8.5 + 4*dimension2, 0.5],
  Graphics[Text["y-Settings", {16.5, 53.5}, {0, -1}, {0, 1}]];
(* Display Selected Genes Raster Displays *)
g = Show[{legend1, genes1, legend2, genes2},
  AspectRatio -> 1.3,
  PlotRange -> {{-6.5, 39.5}, {2, 75}}];

```

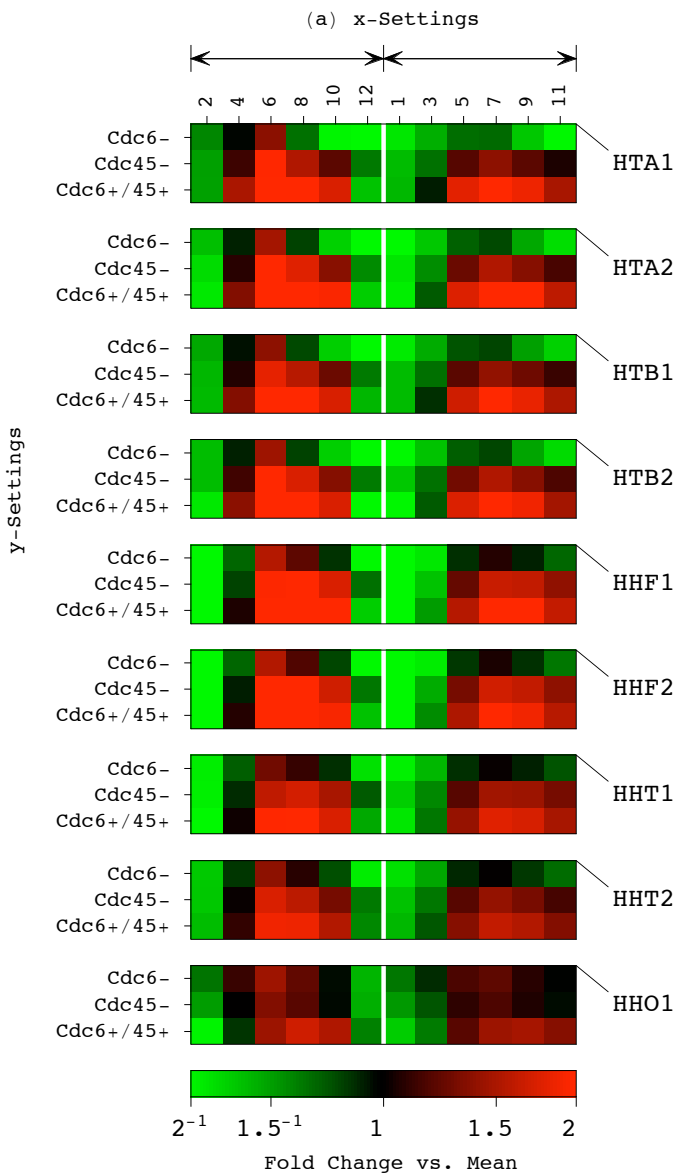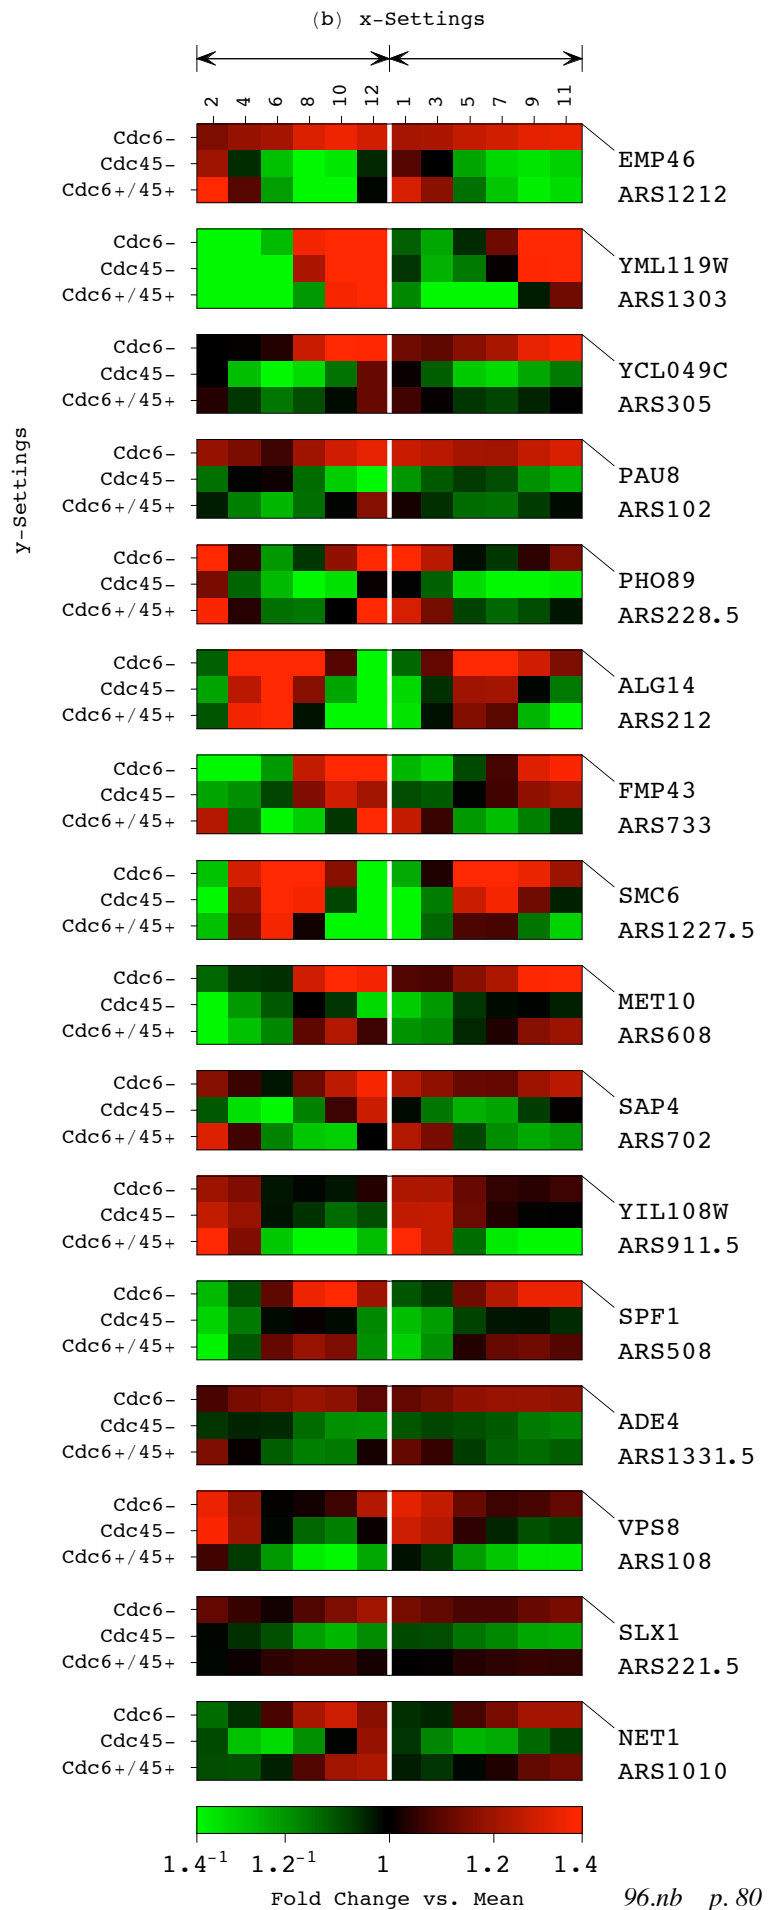



```
(* Display Sorted Averaged Data Tensor *)
```

```
(* Center Data Tensor *)
```

```
ctensor = Transpose[Flatten[Transpose[tensor, {1, 3, 2}], 1]];
average = N[Table[1, {a, 1, xarrays * yarrays}] / Sqrt[xarrays * yarrays]];
ctensor = ctensor - N[Outer[Times, Dot[ctensor, average], average]];
```

```
(* Sort Data Tensor *)
```

```
x = 2;
y = 3;
phase = -ArcTan[TakeColumns[zeigenarrays, {y}] / TakeColumns[zeigenarrays, {x}]] +
  (Sign[TakeColumns[zeigenarrays, {x}] + Table[{1}, {a, 1, zgenes}]] * Pi / 2.);
stensor = AppendRows[phase, ctensor];
stensor = Sort[stensor, OrderedQ[{{#2, #1}} &];
stensor = {
  TakeColumns[stensor, {2, xarrays + 1}],
  TakeColumns[stensor, {xarrays + 2, 2 * xarrays + 1}],
  TakeColumns[stensor, {2 * xarrays + 2, 3 * xarrays + 1}]];
Clear[x, y];
```

```
(* Create Data Tensor 2 D Red & Green Raster Display *)
```

```
length = 0.025;
contrast = 1 / (Log[2, 1.2] / product1 / product2);
displaying = Table[
  If[contrast * stensor[[i, j, k]] > 0,
    If[contrast * stensor[[i, j, k]] < 1, {contrast * stensor[[i, j, k]], 0}, {1, 0}],
    If[contrast * stensor[[i, j, k]] > -1, {0, -contrast * stensor[[i, j, k]]}, {0, 1}],
  {i, 1, yarrays}, {j, zgenes, 1, -1}, {k, 1, xarrays}];
colortensor[i_] := Table[
  RGBColor[displaying[[i, j, k, 1]], displaying[[i, j, k, 2]], 0],
  {j, 1, zgenes}, {k, 1, xarrays}];
gtensor = {
  Graphics[RasterArray[colortensor[1], {{0, -18}, {24, 36}}]],
  Graphics[RasterArray[colortensor[2], {{24, -6}, {48, 48}}]],
  Graphics[RasterArray[colortensor[3], {{48, 6}, {72, 60}}]],
  Graphics[{RGBColor[0, 0, 0], Line[{{24, -18}, {0, -18}, {0, 36}, {48, 60},
    {72, 60}, {72, 6}, {24, -18}}]}],
  Graphics[{RGBColor[1, 1, 1], Line[{{72, 60}, {24, 36}}]}],
  Graphics[{RGBColor[1, 1, 1], Line[{{24, -6}, {24, 36}}]}],
  Graphics[{RGBColor[1, 1, 1], Line[{{48, -6}, {48, 48}}]}],
  Graphics[{RGBColor[1, 1, 1], Thickness[0.0044], Line[{{12, -18}, {12, 36}}]}],
  Graphics[{RGBColor[1, 1, 1], Thickness[0.0044], Line[{{36, -6}, {36, 48}}]}],
  Graphics[{RGBColor[1, 1, 1], Thickness[0.0044], Line[{{60, 6}, {60, 60}}]}],
  Table[Graphics[Line[{{24 * a - 24, 24 + 12 * a}, {24 * a - 28, 26 + 12 * a}}]], {a, 1, 3}],
  Table[Graphics[Text[yarraynames[[a]], {24 * a - 29, 26.5 + 12 * a}, {1, 0}], {a, 1, 3}],
  Graphics[Text["y-Settings", {-2, 53}, {0, 0}, {1, 1}]],
  Table[Graphics[Line[{{2 * a - 1, 60}, {2 * a - 1, 61}}]], {a, 25, 36}],
  Table[Graphics[
    Text[StyleForm[xarraynames[[a]], FontSize -> 7], {2 * a + 47, 61.75}, {0, -1}, {0, 1}], {a, 1, 12}],
  arrows[48, 60, 72, 66, 0.75],
  Graphics[Text["x-Settings", {60, 69}]],
  Graphics[Text["Genes", {-5, 31.5}, {0, 0}, {0, 1}]]];
```

(\* Display Data Tensor \*)

```
colorscale = Table[
  If[j > 60, RGBColor[(j - 60) / 60, 0, 0], RGBColor[0, (60 - j) / 60, 0]],
  {j, 1, 120}, {k, 1, 1}];
g = Show[{
  gtensor,
  Graphics[Text["Fold Change vs. Mean", {80, 31.5}, {0, 0}, {0, 1}]],
  Graphics[RasterArray[colorScale, {{85, 6}, {88, 60}}]],
  Graphics[Line[{{85, 6}, {88, 6}, {88, 60}, {85, 60}, {85, 6}}]],
  Graphics[Line[{{88, 60}, {90, 60}}]],
  Graphics[Line[
    {{88, Log[2, 1.1] * 27 / Log[2, 1.2] + 33}, {90, Log[2, 1.1] * 27 / Log[2, 1.2] + 33}}]],
  Graphics[Line[{{88, 33}, {90, 33}}]],
  Graphics[Line[
    {{88, Log[2, 1 / 1.1] * 27 / Log[2, 1.2] + 33}, {90, Log[2, 1 / 1.1] * 27 / Log[2, 1.2] + 33}}]],
  Graphics[Line[{{88, 6}, {90, 6}}]],
  Graphics[Text[StyleForm["1.2", FontSize -> 12], {91, 60}, {-1, 0}, {1, 0}]],
  Graphics[Text[StyleForm["1.1", FontSize -> 12],
    {91, Log[2, 1.1] * 27 / Log[2, 1.2] + 33}, {-1, 0}, {1, 0}]],
  Graphics[Text[StyleForm["1", FontSize -> 12], {91, 33}, {-1, 0}, {1, 0}]],
  Graphics[Text[StyleForm["1.1-1", FontSize -> 12],
    {91, Log[2, 1 / 1.1] * 27 / Log[2, 1.2] + 33}, {-1, 0}, {1, 0}]],
  Graphics[Text[StyleForm["1.2-1", FontSize -> 12], {91, 6}, {-1, 0}, {1, 0}]]
}, PlotRange -> {{-20, 105}, {-19, 71}},
  AspectRatio -> 1.5];
```

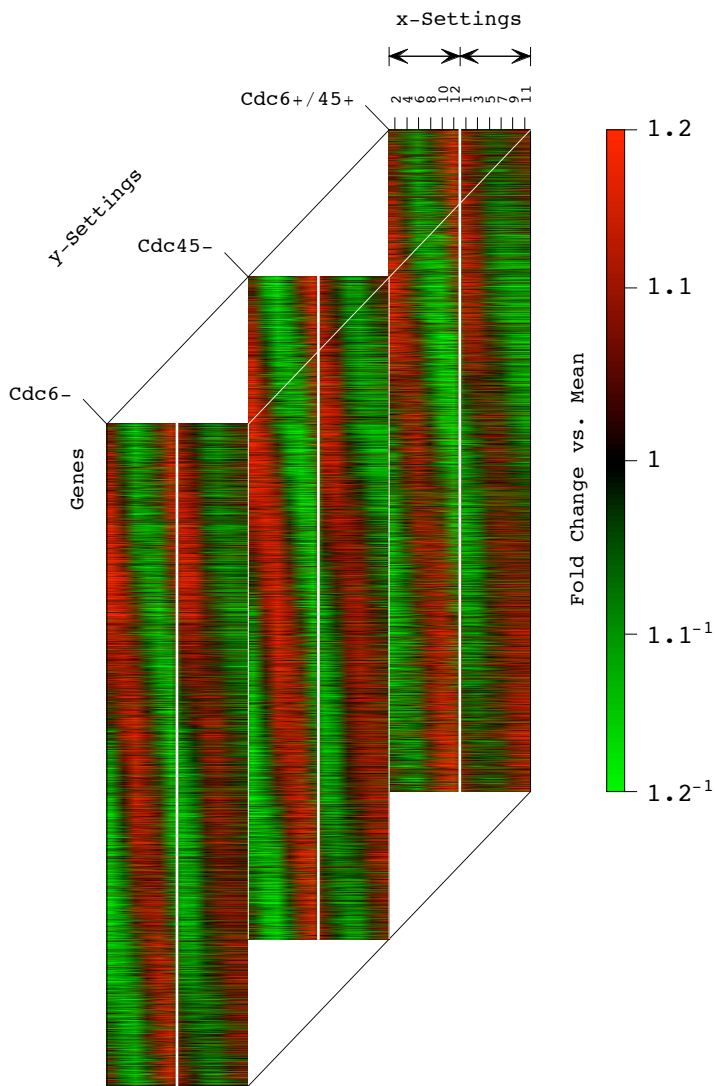

(\* Save Averaged and Sorted Data Tensor \*)

```
arraynames = Table[StringJoin[
  yarraynames[[IntegerPart[a / (xarrays + 0.5) + 1]], "_", ToString[zarraynames[[a]]]],
  {a, 1, xarrays * yarrays}];
arraynames = AppendRows[{{"Angular_Distance", "SGD_YORF"}}, {arraynames}];
```

(\* Sort Data Tensor \*)

```
x = 2;
y = 3;
phase = -ArcTan[TakeColumns[zeigenarrays, {y}] / TakeColumns[zeigenarrays, {x}]] +
  (Sign[TakeColumns[zeigenarrays, {x}] + Table[{1}, {a, 1, zgenes}]] * Pi / 2.;
stensor = AppendRows[phase, genenames,
  N[Round[Transpose[Flatten[Transpose[tensor, {1, 3, 2}], 1]] * 100000 * product1 * product2] / 100000]];
stensor = Sort[stensor, OrderedQ[{{#2, #1}} &];
phase = N[Round[TakeColumns[stensor, {1}] / Pi * 100000] / 100000];
stensor = AppendRows[phase, TakeColumns[stensor, {2, xarrays * yarrays + 2}]];
averaged = AppendColumns[arraynames, stensor];
Clear[x, y];
stream = OpenWrite["Desktop/96/Data/Averaged_Data.txt", PageWidth -> Infinity];
Write[stream, OutputForm[TableForm[averaged, TableSpacing -> {0, 1}]]];
Close[stream];
```

```
(* Display Reformulated HOSVD of the Data Tensor *)
```

```
(* Display Data Tensor *)
```

```
(* Sort Data Tensor *)
```

```
space = 18;  
x = 2;  
y = 3;  
phase = -ArcTan[TakeColumns[zeigenarrays, {y}]/TakeColumns[zeigenarrays, {x}]] +  
  (Sign[TakeColumns[zeigenarrays, {x}]] + Table[{1}, {a, 1, zgenes}]) * Pi / 2.;  
stensor = AppendRows[phase, Transpose[Flatten[Transpose[tensor, {1, 3, 2}], 1]]];  
stensor = Sort[stensor, OrderedQ[{{#2, #1}}] &];  
stensor = {  
  TakeColumns[stensor, {2, xarrays + 1}],  
  TakeColumns[stensor, {xarrays + 2, 2 * xarrays + 1}],  
  TakeColumns[stensor, {2 * xarrays + 2, 3 * xarrays + 1}];  
Clear[x, y];
```

```
(* x-Center Data Tensor *)
```

```
average = N[Table[1, {a, 1, xarrays}]/Sqrt[xarrays]];  
ctensor = stensor - N[Outer[Times, Dot[stensor, average], average]];
```

```
(* Create Data Tensor 2 D Red & Green Raster Display *)
```

```
length = 0.00625;  
contrast = 125;  
displaying = Table[  
  If[contrast * ctensor[[i, j, k]] > 0,  
    If[contrast * ctensor[[i, j, k]] < 1, {contrast * ctensor[[i, j, k]], 0}, {1, 0}],  
    If[contrast * ctensor[[i, j, k]] > -1, {0, -contrast * ctensor[[i, j, k]]}, {0, 1}]],  
  {i, 1, yarrays}, {j, zgenes, 1, -1}, {k, 1, xarrays}];  
colortensor[i_] := Table[  
  RGBColor[displaying[[i, j, k, 1]], displaying[[i, j, k, 2]], 0],  
  {j, 1, zgenes}, {k, 1, xarrays}];  
gtensor = {  
  Graphics[RasterArray[colortensor[1], {{0, -18}, {24, 36}}]],  
  Graphics[RasterArray[colortensor[2], {{24, -6}, {48, 48}}]],  
  Graphics[RasterArray[colortensor[3], {{48, 6}, {72, 60}}]],  
  Graphics[{RGBColor[0, 0, 0], Line[{{24, -18}, {0, -18}, {0, 36}, {48, 60},  
    {72, 60}, {72, 6}, {24, -18}}]}],  
  Graphics[{RGBColor[1, 1, 1], Line[{{72, 60}, {24, 36}}]}],  
  Graphics[{RGBColor[1, 1, 1], Line[{{24, -6}, {24, 36}}]}],  
  Graphics[{RGBColor[1, 1, 1], Line[{{48, -6}, {48, 48}}]}],  
  Graphics[{RGBColor[1, 1, 1], Thickness[0.0011], Line[{{12, -18}, {12, 36}}]}],  
  Graphics[{RGBColor[1, 1, 1], Thickness[0.0011], Line[{{36, -6}, {36, 48}}]}],  
  Graphics[{RGBColor[1, 1, 1], Thickness[0.0011], Line[{{60, 6}, {60, 60}}]}],  
  Table[Graphics[Line[{{24 * a - 24, 24 + 12 * a}, {24 * a - 28, 26 + 12 * a}}]], {a, 1, 3}],  
  Table[Graphics[Text[yarraynames[[a]], {24 * a - 29, 26.5 + 12 * a}, {1, 0}], {a, 1, 3}],  
  Graphics[Text["y-Settings", {-2, 53}, {0, 0}, {1, 1}]],  
  Table[Graphics[Line[{{2 * a - 1, 60}, {2 * a - 1, 61}}]], {a, 25, 36}],  
  Table[Graphics[  
    Text[StyleForm[xarraynames[[a]], FontSize -> 7], {2 * a + 47, 61.75}, {0, -1}, {0, 1}], {a, 1, 12}],  
  arrows[48, 60, 72, 66, 0.75],  
  Graphics[Text["x-Settings", {60, 69}]],  
  Graphics[Text["Genes", {-5, 31.5}, {0, 0}, {0, 1}]]];
```

```
(* Display Eigenarrays *)
```

```
(* Sort Eigenarrays *)
```

```
x = 2;  
y = 3;  
phase = -ArcTan[TakeColumns[zeigenarrays, {y}] / TakeColumns[zeigenarrays, {x}]] +  
  (Sign[TakeColumns[zeigenarrays, {x}]] + Table[{1}, {a, 1, zgenes}]) * Pi / 2.;  
matrix = AppendRows[phase, zeigenarrays];  
matrix = Sort[matrix, OrderedQ[{#2, #1}] &];  
matrix = TakeColumns[matrix, {2, Dimensions[zeigenarrays][[2]] + 1}]; Clear[x, y];
```

```
(* Create Eigenarrays 2 D Red & Green Raster Display *)
```

```
contrast = 75;  
displaying = Table[  
  If[contrast * matrix[[i, j]] > 0,  
    If[contrast * matrix[[i, j]] < 1, {contrast * matrix[[i, j]], 0}, {1, 0}],  
    If[contrast * matrix[[i, j]] > -1, {0, -contrast * matrix[[i, j]]}, {0, 1}]],  
  {i, zgenes, 1, -1}, {j, 1, Dimensions[zeigenarrays][[2]]}];  
colorz = Table[RGBColor[displaying[[i, j, 1]], displaying[[i, j, 2]], 0],  
  {i, 1, zgenes}, {j, 1, Dimensions[zeigenarrays][[2]]}];  
gzeigenarrays = {  
  Graphics[RasterArray[colorz, {{space + 76, -18}, {space + 94, 36}}]],  
  Graphics[{RGBColor[0, 0, 0], Line[{{space + 76, -18}, {space + 76, 36}, {space + 94, 36},  
    {space + 94, -18}, {space + 76, -18}}]}],  
  Table[Graphics[Line[{{2 * a + space + 75.5, 36}, {2 * a + space + 75.5, 36 + 1}}]], {a, 1, 9}],  
  Table[Graphics[Text[StyleForm[a, FontSize -> 7], {2 * a + space + 75.5, 37.75},  
    {0, -1}, {0, 1}]], {a, 1, 9}],  
  Graphics[Text["Eigenarrays", {space + 85, 42}]],  
  Graphics[Text["Genes", {space + 71, 31.5}, {0, 0}, {0, 1}]]];
```

```
(* Display Core *)
```

```
(* Create Core 2 D Red & Green Raster Display *)
```

```
contrast = 5;  
displaying = Table[  
  If[contrast * core[[i, j, k]] > 0,  
    If[contrast * core[[i, j, k]] < 1, {contrast * core[[i, j, k]], 0}, {1, 0}],  
    If[contrast * core[[i, j, k]] > -1, {0, -contrast * core[[i, j, k]]}, {0, 1}]],  
  {i, 1, yarrays}, {j, Dimensions[core][[2]], 1, -1}, {k, 1, Dimensions[core][[3]]}];  
colorcore[i_] := Table[RGBColor[displaying[[i, j, k, 1]], displaying[[i, j, k, 2]], 0],  
  {j, 1, Dimensions[core][[2]]}, {k, 1, Dimensions[core][[3]]}];  
gcore = {  
  Graphics[RasterArray[colorcore[1], {{2 * space + 94, 27}, {2 * space + 112, 36}}]],  
  Graphics[RasterArray[colorcore[2], {{2 * space + 118, 39}, {2 * space + 136, 48}}]],  
  Graphics[RasterArray[colorcore[3], {{2 * space + 142, 51}, {2 * space + 160, 60}}]],  
  Graphics[{RGBColor[0, 0, 0], Line[{{2 * space + 94, 36}, {2 * space + 94, 27},  
    {2 * space + 112, 27}, {2 * space + 160, 51}, {2 * space + 160, 60}, {2 * space + 142, 60},  
    {2 * space + 94, 36}}]}],  
  Graphics[{RGBColor[1, 1, 1], Line[{{2 * space + 142, 51}, {2 * space + 160, 60}}]}],  
  Graphics[{RGBColor[0, 0, 0], Line[{{2 * space + 118, 39}, {2 * space + 142, 51}}]}],  
  Graphics[{RGBColor[1, 1, 1], Line[{{2 * space + 118, 39}, {2 * space + 136, 48}}]}],  
  Graphics[{RGBColor[0, 0, 0], Line[{{2 * space + 112, 36}, {2 * space + 118, 39}}]}],  
  Table[Graphics[Line[{{2 * space + 70 + 24 * a, 24 + 12 * a}, {2 * space + 66 + 24 * a, 26 + 12 * a}}]], {a, 1, 3}],  
  Table[Graphics[Text[a, {2 * space + 65 + 24 * a, 26.5 + 12 * a}, {1, 0}]], {a, 1, 3}],  
  Graphics[Text["y-Eigenenes", {2 * space + 108, 53}, {0, 0}, {1, 1}]],  
  Table[Graphics[Line[{{2 * space + 141 + 2 * a, 60}, {2 * space + 141 + 2 * a, 61}}]], {a, 1, 9}],  
  Table[Graphics[Text[StyleForm[a, FontSize -> 7],  
    {2 * space + 141 + 2 * a, 61.75}, {0, -1}, {0, 1}]], {a, 1, 9}],  
  Graphics[Text["x-Eigenenes", {2 * space + 151, 66}]],  
  Table[Graphics[Line[{{2 * space + 94, 26.5 + a},  
    {2 * space + 92.25, 26.5 + a}}]], {a, 1, 9}],  
  Table[Graphics[Text[StyleForm[a, FontSize -> 7],  
    {2 * space + 91.25, 36.5 - a}, {1, 0}]], {a, 1, 9}],  
  Graphics[Text["Eigenarrays", {2 * space + 85, 31.5 - 1}, {0, 0}, {0, 1}]]];
```

```
(* Display x-Eigengenes *)
```

```
(* x-Center x-Eigengenes *)
```

```
matrix = xeigengenes;  
average = N[Table[1, {a, 1, xarrays}] / Sqrt[xarrays]];  
matrix = matrix - N[Outer[Times, Dot[matrix, average], average]];
```

```
(* Create x-Eigengenes 2D Red & Green Raster Display *)
```

```
length = 0.00625;  
contrast = 3.5;  
displaying = Table[  
  If[contrast * matrix[[i, j]] > 0,  
    If[contrast * matrix[[i, j]] < 1, {contrast * matrix[[i, j]], 0}, {1, 0}],  
    If[contrast * matrix[[i, j]] > -1, {0, -contrast * matrix[[i, j]]}, {0, 1}]],  
  {i, Dimensions[xeigengenes][[1]], 1, -1}, {j, 1, xarrays}];  
colorx = Table[  
  RGBColor[displaying[[i, j, 1]], displaying[[i, j, 2]], 0],  
  {i, 1, Dimensions[xeigengenes][[1]]}, {j, 1, xarrays}];  
gxeigengenes = {  
  Graphics[RasterArray[colorx, {{3 * space + 160, 27}, {3 * space + 184, 36}}]],  
  Graphics[{RGBColor[0, 0, 0], Line[{{3 * space + 160, 27}, {3 * space + 160, 36},  
    {3 * space + 184, 36}, {3 * space + 184, 27}, {3 * space + 160, 27}}]}],  
  Graphics[{RGBColor[1, 1, 1], Thickness[0.0011], Line[{{3 * space + 172, 27}, {3 * space + 172, 36}}]}],  
  Table[Graphics[Line[{{3 * space + 159 + 2 * a, 36}, {3 * space + 159 + 2 * a, 37}}]], {a, 1, 12}],  
  Table[Graphics[Text[StyleForm[xarraynames[[a]], FontSize -> 7], {3 * space + 159 + 2 * a, 37.75},  
    {0, -1}, {0, 1}]], {a, 1, 12}],  
  arrows[3 * space + 160, 3 * space + 172, 3 * space + 184, 42, 0.75],  
  Graphics[Text["x-Settings", {3 * space + 172, 45}]],  
  Table[Graphics[Line[{{3 * space + 160, 26.5 + a}, {3 * space + 158.25, 26.5 + a}}]], {a, 1, 9}],  
  Table[Graphics[Text[StyleForm[a, FontSize -> 7], {3 * space + 157.25, 36.5 - a}, {1, 0}]], {a, 1, 9}],  
  Graphics[Text["x-Eigengenes", {3 * space + 151, 31.5}, {0, 0}, {0, 1}]]];
```

```
(* Display y-Eigengenes *)
```

```
(* Create y-Eigengenes 2D Red & Green Raster Display *)
```

```
contrast = 1.5;  
displaying = Table[  
  If[contrast * yeigengenes[[i, j]] > 0,  
    If[contrast * yeigengenes[[i, j]] < 1, {contrast * yeigengenes[[i, j]], 0}, {1, 0}],  
    If[contrast * yeigengenes[[i, j]] > -1, {0, -contrast * yeigengenes[[i, j]]}, {0, 1}]],  
  {i, yarrays, 1, -1}, {j, 1, yarrays}];  
colory[x_, y_, dx_, dy_] := Table[{  
  RGBColor[displaying[[i, j, 1]], displaying[[i, j, 2]], 0],  
  Polygon[{  
    {x + (j - 1) * dx, y + 0.5 * (j - 1) * dx + (i - 1) * dy},  
    {x + j * dx, y + 0.5 * j * dx + (i - 1) * dy},  
    {x + j * dx, y + 0.5 * j * dx + i * dy},  
    {x + (j - 1) * dx, y + .5 * (j - 1) * dx + i * dy},  
    {x + (j - 1) * dx, y + 0.5 * (j - 1) * dx + (i - 1) * dy}}],  
  {i, 1, yarrays}, {j, 1, yarrays}];  
gyeigengenes = {  
  Graphics[colory[3 * space + 160, 60, 8, 3]],  
  Graphics[{RGBColor[0, 0, 0], Line[{{3 * space + 160, 60},  
    {3 * space + 160, 69}, {3 * space + 184, 81}, {3 * space + 184, 72}, {3 * space + 160, 60}}]}],  
  Table[Graphics[Line[{{3 * space + 160, 58.5 + 3 * a}, {3 * space + 158.25, 58.5 + 3 * a}}]], {a, 1, 3}],  
  Table[Graphics[Text[a, {3 * space + 157.25, 70.5 - 3 * a}, {1, 0}]], {a, 1, 3}],  
  Graphics[Text["y-Eigengenes", {3 * space + 151, 60}, {0, 0}, {0, 1}]],  
  Table[Graphics[Line[{{3 * space + 155.5 + 8 * a, 66.75 + 4 * a},  
    {3 * space + 151.5 + 8 * a, 68.75 + 4 * a}}]], {a, 1, 3}],  
  Table[Graphics[Text[yarraynames[[a]], {3 * space + 150.5 + 8 * a, 69.25 + 4 * a},  
    {1, 0}]], {a, 1, 3}],  
  Graphics[Text["y-Settings", {3 * space + 145.5 - 2, 79.75}, {0, 0}, {1, 1}]]];
```

```
(* Display Second Subtensor *)
```

```
subtensor = Outer[Times, yeigengenes[[1]], Flatten[TakeColumns[rzeigenarrays, {2}]], xeigengenes[[2]]];
```

```
(* Sort Subtensor *)
```

```
x = 2;  
y = 3;  
phase = -ArcTan[TakeColumns[zeigenarrays, {y}] / TakeColumns[zeigenarrays, {x}]] +  
  (Sign[TakeColumns[zeigenarrays, {x}] + Table[{1}, {a, 1, zgenes}]] * Pi / 2.);  
stensor = AppendRows[phase, Transpose[Flatten[Transpose[subtensor, {1, 3, 2}], 1]]];  
stensor = Sort[stensor, OrderedQ[#{2, #1} &];  
stensor = {  
  TakeColumns[stensor, {2, xarrays + 1}],  
  TakeColumns[stensor, {xarrays + 2, 2 * xarrays + 1}],  
  TakeColumns[stensor, {2 * xarrays + 2, 3 * xarrays + 1}];  
Clear[x, y];
```

```
(* x-Center Subtensor *)
```

```
average = N[Table[1, {a, 1, xarrays}] / Sqrt[xarrays]];  
ctensor = stensor - N[Outer[Times, Dot[stensor, average], average]];
```

```
(* Create Subtensor 2 D Red & Green Raster Display *)
```

```
length = 0.00625;  
contrast = 350;  
displaying = Table[  
  If[contrast * ctensor[[i, j, k]] > 0,  
    If[contrast * ctensor[[i, j, k]] < 1, {contrast * ctensor[[i, j, k]], 0}, {1, 0}],  
    If[contrast * ctensor[[i, j, k]] > -1, {0, -contrast * ctensor[[i, j, k]]}, {0, 1}]],  
  {i, 1, yarrays}, {j, zgenes, 1, -1}, {k, 1, xarrays}];  
colortensor[i_] := Table[  
  RGBColor[displaying[[i, j, k, 1]], displaying[[i, j, k, 2]], 0],  
  {j, 1, zgenes}, {k, 1, xarrays}];  
gsubtensor1 = {  
  Graphics[RasterArray[colortensor[1], {{5.625 * space + 189, -18}, {5.625 * space + 213, 36}}]],  
  Graphics[RasterArray[colortensor[2], {{5.625 * space + 213, -6}, {5.625 * space + 237, 48}}]],  
  Graphics[RasterArray[colortensor[3], {{5.625 * space + 237, 6}, {5.625 * space + 261, 60}}]],  
  Graphics[{RGBColor[0, 0, 0], Line[{{5.625 * space + 213, -18}, {5.625 * space + 189, -18},  
    {5.625 * space + 189, 36}, {5.625 * space + 237, 60}, {5.625 * space + 261, 60},  
    {5.625 * space + 261, 6}, {5.625 * space + 213, -18}}]}],  
  Graphics[{RGBColor[1, 1, 1], Line[{{5.625 * space + 261, 60}, {5.625 * space + 213, 36}}]}],  
  Graphics[{RGBColor[1, 1, 1], Line[{{5.625 * space + 213, -6}, {5.625 * space + 213, 36}}]}],  
  Graphics[{RGBColor[1, 1, 1], Line[{{5.625 * space + 237, -6}, {5.625 * space + 237, 48}}]}],  
  Graphics[  
    {RGBColor[1, 1, 1], Thickness[0.0011], Line[{{5.625 * space + 201, -18}, {5.625 * space + 201, 36}}]}],  
  Graphics[{RGBColor[1, 1, 1], Thickness[0.0011],  
    Line[{{5.625 * space + 225, -6}, {5.625 * space + 225, 48}}]}],  
  Graphics[{RGBColor[1, 1, 1], Thickness[0.0011],  
    Line[{{5.625 * space + 249, 6}, {5.625 * space + 249, 60}}]}],  
  Table[Graphics[Line[{{5.625 * space + 165 + 24 * a, 24 + 12 * a},  
    {5.625 * space + 161 + 24 * a, 26 + 12 * a}}]], {a, 1, 3}],  
  Table[Graphics[Text[yarraynames[a], {5.625 * space + 160 + 24 * a, 26.5 + 12 * a}, {1, 0}]], {a, 1, 3}],  
  Graphics[Text["y-Settings", {5.625 * space + 187, 53}, {0, 0}, {1, 1}]],  
  Table[Graphics[Line[{{5.625 * space + 188 + 2 * a, 60}, {5.625 * space + 188 + 2 * a, 61}}]], {a, 25, 36}],  
  Table[Graphics[Text[StyleForm[xarraynames[a], FontSize -> 7], {5.625 * space + 236 + 2 * a, 61.75},  
    {0, -1}, {0, 1}], {a, 1, 12}],  
  arrows[5.625 * space + 237, 5.625 * space + 249, 5.625 * space + 261, 66, 0.75],  
  Graphics[Text["x-Settings", {5.625 * space + 249, 69}]],  
  Graphics[Text["Genes", {5.625 * space + 184, 31.5}, {0, 0}, {0, 1}]]];
```

```
(* Display Third Subtensor *)
```

```
subtensor = Outer[Times, yeigengenes[[1]], Flatten[TakeColumns[rzeigenarrays, {3}]], xeigengenes[[3]]];
```

```
(* Sort Subtensor *)
```

```
x = 2;  
y = 3;  
phase = -ArcTan[TakeColumns[zeigenarrays, {y}] / TakeColumns[zeigenarrays, {x}]] +  
  (Sign[TakeColumns[zeigenarrays, {x}] + Table[{1}, {a, 1, zgenes}]] * Pi / 2.);  
stensor = AppendRows[phase, Transpose[Flatten[Transpose[subtensor, {1, 3, 2}], 1]]];  
stensor = Sort[stensor, OrderedQ[#{2, #1} &];  
stensor = {  
  TakeColumns[stensor, {2, xarrays + 1}],  
  TakeColumns[stensor, {xarrays + 2, 2 * xarrays + 1}],  
  TakeColumns[stensor, {2 * xarrays + 2, 3 * xarrays + 1}];  
Clear[x, y];
```

```
(* x-Center Subtensor *)
```

```
average = N[Table[1, {a, 1, xarrays}] / Sqrt[xarrays]];  
ctensor = stensor - N[Outer[Times, Dot[stensor, average], average]];
```

```
(* Create Subtensor 2 D Red & Green Raster Display *)
```

```
length = 0.00625;  
contrast = 350;  
displaying = Table[  
  If[contrast * ctensor[[i, j, k]] > 0,  
    If[contrast * ctensor[[i, j, k]] < 1, {contrast * ctensor[[i, j, k]], 0}, {1, 0}],  
    If[contrast * ctensor[[i, j, k]] > -1, {0, -contrast * ctensor[[i, j, k]]}, {0, 1}]],  
  {i, 1, yarrays}, {j, zgenes, 1, -1}, {k, 1, xarrays}];  
colortensor[i_] := Table[  
  RGBColor[displaying[[i, j, k, 1]], displaying[[i, j, k, 2]], 0],  
  {j, 1, zgenes}, {k, 1, xarrays}];  
gsubtensor2 = {  
  Graphics[RasterArray[colortensor[1], {{6.75 * space + 261, -18}, {6.75 * space + 285, 36}}]],  
  Graphics[RasterArray[colortensor[2], {{6.75 * space + 285, -6}, {6.75 * space + 309, 48}}]],  
  Graphics[RasterArray[colortensor[3], {{6.75 * space + 309, 6}, {6.75 * space + 333, 60}}]],  
  Graphics[{RGBColor[0, 0, 0], Line[{{6.75 * space + 285, -18},  
    {6.75 * space + 261, -18}, {6.75 * space + 261, 36}, {6.75 * space + 309, 60},  
    {6.75 * space + 333, 60}, {6.75 * space + 333, 6}, {6.75 * space + 285, -18}}]],  
  Graphics[{RGBColor[1, 1, 1], Line[{{6.75 * space + 333, 60}, {6.75 * space + 285, 36}}]],  
  Graphics[{RGBColor[1, 1, 1], Line[{{6.75 * space + 285, -6}, {6.75 * space + 285, 36}}]],  
  Graphics[{RGBColor[1, 1, 1], Line[{{6.75 * space + 309, -6}, {6.75 * space + 309, 48}}]],  
  Graphics[  
    {RGBColor[1, 1, 1], Thickness[0.0011], Line[{{6.75 * space + 273, -18}, {6.75 * space + 273, 36}}]}],  
  Graphics[{{RGBColor[1, 1, 1], Thickness[0.0011], Line[{{6.75 * space + 297, -6}, {6.75 * space + 297, 48}}]}],  
  Graphics[{{RGBColor[1, 1, 1], Thickness[0.0011], Line[{{6.75 * space + 321, 6}, {6.75 * space + 321, 60}}]}],  
  Table[Graphics[Line[{{6.75 * space + 261 + 24 * a - 24, 24 + 12 * a},  
    {6.75 * space + 261 + 24 * a - 28, 26 + 12 * a}}]], {a, 1, 3}],  
  Table[Graphics[Text[yarraynames[a], {6.75 * space + 232 + 24 * a, 26.5 + 12 * a}, {1, 0}]], {a, 1, 3}],  
  Graphics[Text["y-Settings", {6.75 * space + 259, 53}, {0, 0}, {1, 1}]],  
  Table[Graphics[Line[{{6.75 * space + 260 + 2 * a, 60}, {6.75 * space + 260 + 2 * a, 61}}]], {a, 25, 36}],  
  Table[Graphics[Text[StyleForm[xarraynames[a], FontSize -> 7],  
    {6.75 * space + 308 + 2 * a, 61.75}, {0, -1}, {0, 1}]], {a, 1, 12}],  
  arrows[6.75 * space + 309, 6.75 * space + 321, 6.75 * space + 333, 66, 0.75],  
  Graphics[Text["x-Settings", {6.75 * space + 321, 69}]],  
  Graphics[Text["Genes", {6.75 * space + 256, 31.5}, {0, 0}, {0, 1}]]];
```



```
(* Display Reformulated Core Tensor *)
```

```
rcore = {Sqrt[rfractions[[2]]], Sqrt[rfractions[[3]]]};
contrast = 5;
colorrcore = Table[If[contrast * rcore[[i]] < 1, RGBColor[contrast * rcore[[i]], 0, 0],
  RGBColor[1, 0, 0]], {i, 1, 2}];
grcore = {
  Graphics[RasterArray[{{colorrcore[[1]]}}, {{9 * space + 338, 31}, {9 * space + 348, 36}}]],
  Graphics[{RGBColor[0, 0, 0], Line[{{9 * space + 338, 31}, {9 * space + 348, 31},
    {9 * space + 348, 36}, {9 * space + 338, 36}, {9 * space + 338, 31}}]}],
  Graphics[RasterArray[{{colorrcore[[2]]}}, {{9 * space + 338, 24}, {9 * space + 348, 29}}]],
  Graphics[{RGBColor[0, 0, 0], Line[{{9 * space + 338, 24}, {9 * space + 348, 24},
    {9 * space + 348, 29}, {9 * space + 338, 29}, {9 * space + 338, 24}}]}];
```

```
(* Display Reformulated HOSVD *)
```

```
equal1 = Graphics[Text[StyleForm["=", FontSize -> 40], {72 + 0.5 * space, 31.5}]];
equal2 = Graphics[Text[StyleForm["=", FontSize -> 40], {3.5 * space + 184, 31.5}]];
left1 = Graphics[{Thickness[0.0044], Line[{{4 * space + 189, -18},
  {4 * space + 184, -18}, {4 * space + 184, 60}, {4 * space + 189, 60}}]}];
hdots1 = Graphics[Text[StyleForm["...", FontSize -> 40], {4.625 * space + 189, 31.5}]];
coma = Graphics[Text[StyleForm["", FontSize -> 40], {6 * space + 261, 31.5}]];
hdots2 = Graphics[Text[StyleForm["...", FontSize -> 40], {7.5 * space + 333, 31.5}]];
right1 = Graphics[{Thickness[0.0044], Line[{{8.125 * space + 333, -18},
  {8.125 * space + 338, -18}, {8.125 * space + 261 + 72 + 5, 60}, {8.125 * space + 333, 60}}]}];
text1 = Graphics[Text[StyleForm["Subtensors", FontSize -> 12], {6.0625 * space + 261, 75}]];
text2 = Graphics[Text[StyleForm["Subtensors", FontSize -> 12], {8.5 * space + 338, 31.5}, {0, 0}, {0, 1}]];
left2 = Graphics[{Thickness[0.0044], Line[{{8.75 * space + 343, -18},
  {8.75 * space + 338, -18}, {8.75 * space + 338, 60}, {8.75 * space + 343, 60}}]}];
vdots1 = Graphics[Text[StyleForm[":", FontSize -> 40], {9 * space + 343, 36 + 5}]];
vdots2 = Graphics[Text[StyleForm[":", FontSize -> 40], {9 * space + 343, 24 - 6}]];
right2 = Graphics[{Thickness[0.0044], Line[{{9.25 * space + 343, -18},
  {9.25 * space + 348, -18}, {9.25 * space + 348, 60}, {9.25 * space + 343, 60}}]}];
g = Show[{
  gtensor, equal1,
  gzeigenarrays, gcore, gxeigengenes, gyeigengenes, equal2,
  left1, hdots1, gsubtensor1, coma, gsubtensor2, hdots2, right1, text1,
  text2, left2, vdots1, grcore, vdots2, right2},
  PlotRange -> All,
  AspectRatio -> 0.4];
```

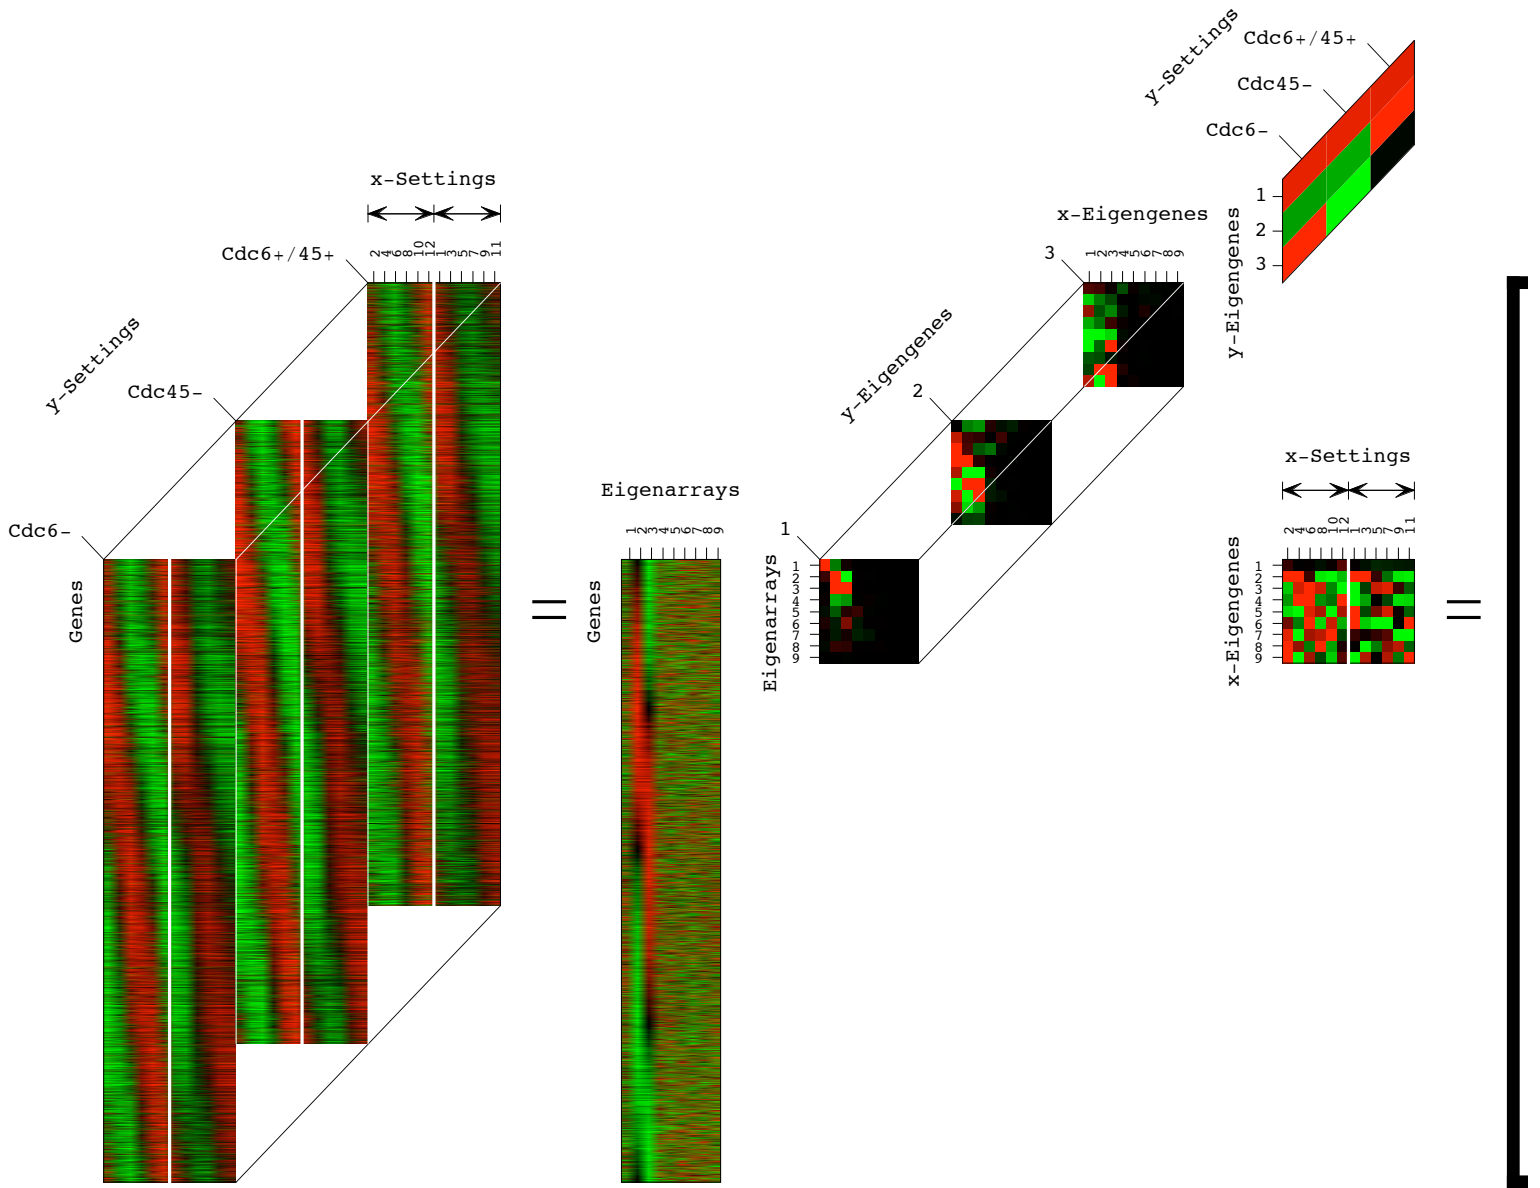

Supplement: msb200970-s3.pdf [file msb200970-s3.pdf]
